# Supplementary material
Source: PubMed Central journal article supplement (PMC3320203)
Supplement: supp_pp.111.190140_190140Table_S1.pdf [file supp_pp.111.190140_190140Table_S1.pdf]

**Table S1.** List of primers used in this study for quantitative RT-PCR, RT-PCR and genome walking experiments.

| Accession              | Gene      | Forward primer (5' to 3')                                       | Reverse primer (5' to 3')       |
|------------------------|-----------|-----------------------------------------------------------------|---------------------------------|
| <b>qRT-PCR primers</b> |           |                                                                 |                                 |
| At4g20890              | TUB9      | GTA CCT TGA AGC TTG CTA ATC CTA                                 | GTT CTG GAC GTT CAT CAT CTG TTC |
| At1g13440              | GAPDH     | TTG GTG ACA ACA GGT CAA GCA                                     | AAA CTT GTC GCT CAA TGC AAT C   |
| At1g18570              | MYB51     | ACA AAT GGT CTG CTA TAG CT                                      | CTT GTG TGT AAC TGG ATC AA      |
| At2g30750              | CYP71A12  | GAT TAT CAC CTC GGT TCC T                                       | CCA CTA ATA CTT CCC AGA TTA     |
| At4g39950              | CYP79B2   | GTA ACT TCG GAG CAT TCG T                                       | TCG CCG GAT ATC ACA TCC         |
| At5g57220              | CYP81F2   | CTC ATG CTC AGT ATG ATG C                                       | CTC CAA TCT TCT CGT CTA TC      |
| At3g12500              | PR3       | GTA TGG CTG GAC CGC CTT C                                       | GTT CTT CAC CCT TAA ACA CTT GC  |
| At3g04720              | PR4       | GTT GCT GCA TTG GTC CAC TA                                      | GGG TGA AGA ACA CAA GAA CAA A   |
| At1g75040              | PR5       | TCA TCA CAA GCG GCA TTG CT                                      | CGG TGT ACG CAC AAC TGT TT      |
| At419660               | NPR4      | ACA CCC ACT TGT TCC CAT TC                                      | TGG GGA TAC ACC CAC TTG TT      |
| At3g49110              | PRX33     | GGT CAG GTA ATC CAG TGT TGC                                     | GCT CTC CGG GGC TCA C           |
| At3g49120              | PRX34     | TAG GGT CGG GTA AAC CTG TG                                      | GTT GCT CTC TCC GGT GGT C       |
| At5g47910              | RBOHD     | CTG GAC ACG TAA GCT CAG GA                                      | GCC GAG ACC TAC GAG GAG TA      |
| At1g64060              | RBOHF     | TCA CAA ATC AAC GAC GAG AGT T                                   | CCC ATC TTC ATT CTT GTC CA      |
| <b>RT-PCR primers</b>  |           |                                                                 |                                 |
| AF149277               | AsFBP1    | ATA GGT TCA GTA GCA ACC                                         | GGA AAC AAC ATC ATG AAA ATA CAG |
| At5g62690              | B-Tubulin | CTG TCT CCA AGG GTT CCA G                                       | GAG CAA AAC CCA CCA TGA AG      |
| <b>Genome walking</b>  |           |                                                                 |                                 |
| Long adaptor           | LA        | GTA ATA CGA CTC ACT ATA GGG CAC GCG TGG TCG ACG GCC CGG GCT GGT |                                 |
| Short adaptor          | SA        | PO4- ACC AGC CC -N2H                                            |                                 |
| Adaptor                | AP1       | GTA ATA CGA CTC ACT ATA GGG C                                   |                                 |
| Adaptor                | AP2       | ACT ATA GGG CAC GCG TGG T                                       |                                 |
| Gene specific primer 1 | GSP1      | CCG TCT CAC TGG TGA AAA GAA AAA CC                              |                                 |
| Gene specific primer 2 | GSP2      | CCC AGT ACA TTA AAA ACG TCC GCA AT                              |                                 |
