# Supplementary material
Source: PubMed Central journal article supplement (PMC3320203)
Supplement: supp_pp.111.190140_190140table_S2_FINAL_FOR_PAPER.pdf [file supp_pp.111.190140_190140table_S2_FINAL_FOR_PAPER.pdf]

| Table S2. List of peptides identified by in-gel trypsin digestion of CaCl <sub>2</sub> -extracted cell wall proteins of Arabidopsis Ler (wt) and LerasFBP1 cells. |              |            |                                     |             |       |             |          |          |            |           |         |      |       |         |      |                                       |
|-------------------------------------------------------------------------------------------------------------------------------------------------------------------|--------------|------------|-------------------------------------|-------------|-------|-------------|----------|----------|------------|-----------|---------|------|-------|---------|------|---------------------------------------|
| Band N°                                                                                                                                                           | Accession N° | AlG number | Description                         | Species     | Score | Peptides N° | Cover. % | Observed | M(tryptic) | M(calcd)  | Delta   | Mass | Score | Expect  | Rank | Peptide                               |
| 2                                                                                                                                                                 | NP_564414    | A1L32950   | ATSBT3.3; subtilase                 | A. thaliana | 442   | 11          | 15       | 372.7214 | 743.4282   | 743.4290  | -0.0007 | 0    | 23    | 8.4     | 2    | K.GLAGLTLR.G                          |
|                                                                                                                                                                   | NP_564414    |            | ATSBT3.3; subtilase                 | A. thaliana | 442   |             |          | 404.7199 | 807.4232   | 807.4239  | -0.0007 | 0    | 30    | 1.8     | 1    | K.VYVSSRR.G                           |
|                                                                                                                                                                   | NP_564414    |            | ATSBT3.3; subtilase                 | A. thaliana | 442   |             |          | 404.7191 | 807.4236   | 807.4239  | -0.0003 | 0    | (24)  | 6.9     | 1    | K.VYVSSRR.G                           |
|                                                                                                                                                                   | NP_564414    |            | ATSBT3.3; subtilase                 | A. thaliana | 442   |             |          | 494.2766 | 986.5386   | 986.5397  | -0.0010 | 0    | (27)  | 2.4     | 1    | R.TLSGQPVGTV.K                        |
|                                                                                                                                                                   | NP_564414    |            | ATSBT3.3; subtilase                 | A. thaliana | 442   |             |          | 494.2767 | 986.5388   | 986.5397  | -0.0008 | 0    | (30)  | 1.2     | 1    | R.TLSGQPVGTV.K                        |
|                                                                                                                                                                   | NP_564414    |            | ATSBT3.3; subtilase                 | A. thaliana | 442   |             |          | 494.2769 | 986.5392   | 986.5397  | -0.0004 | 0    | 39    | 0.17    | 1    | R.TLSGQPVGTV.K                        |
|                                                                                                                                                                   | NP_564414    |            | ATSBT3.3; subtilase                 | A. thaliana | 442   |             |          | 514.3164 | 1026.6182  | 1026.6186 | -0.0003 | 0    | 64    | 0.00044 | 1    | K.AAGGLGLISR.N                        |
|                                                                                                                                                                   | NP_564414    |            | ATSBT3.3; subtilase                 | A. thaliana | 442   |             |          | 514.3166 | 1026.6186  | 1026.6186 | 0.0001  | 0    | (62)  | 0.00072 | 1    | K.AAGGLGLISR.N                        |
|                                                                                                                                                                   | NP_564414    |            | ATSBT3.3; subtilase                 | A. thaliana | 442   |             |          | 526.7800 | 1051.5454  | 1051.5485 | -0.0030 | 0    | 30    | 1.1     | 1    | K.VVLCFTASR.T                         |
|                                                                                                                                                                   | NP_564414    |            | ATSBT3.3; subtilase                 | A. thaliana | 442   |             |          | 526.7947 | 1051.5748  | 1051.5485 | 0.0264  | 0    | (22)  | 7.5     | 1    | K.VVLCFTASR.T                         |
|                                                                                                                                                                   | NP_564414    |            | ATSBT3.3; subtilase                 | A. thaliana | 442   |             |          | 526.8079 | 1051.6012  | 1051.6026 | -0.0014 | 0    | 30    | 1.3     | 1    | K.VSVEPPLGVR.V                        |
|                                                                                                                                                                   | NP_564414    |            | ATSBT3.3; subtilase                 | A. thaliana | 442   |             |          | 526.8083 | 1051.6020  | 1051.6026 | -0.0006 | 0    | (23)  | 5.2     | 1    | K.VSVEPPLGVR.V                        |
|                                                                                                                                                                   | NP_564414    |            | ATSBT3.3; subtilase                 | A. thaliana | 442   |             |          | 556.7247 | 1111.4348  | 1111.4353 | -0.0004 | 0    | 47    | 0.024   | 1    | K.GGCESGENFR.S                        |
|                                                                                                                                                                   | NP_564414    |            | ATSBT3.3; subtilase                 | A. thaliana | 442   |             |          | 556.7255 | 1111.4364  | 1111.4353 | 0.0012  | 0    | (46)  | 0.027   | 1    | K.GGCESGENFR.S                        |
|                                                                                                                                                                   | NP_564414    |            | ATSBT3.3; subtilase                 | A. thaliana | 442   |             |          | 614.7623 | 1227.5100  | 1227.5112 | -0.0011 | 0    | 41    | 0.088   | 1    | K.GVTCSDSDIMK.A + Oxidation (M)       |
|                                                                                                                                                                   | NP_564414    |            | ATSBT3.3; subtilase                 | A. thaliana | 442   |             |          | 614.7630 | 1227.5114  | 1227.5112 | 0.0003  | 0    | (38)  | 0.18    | 1    | K.GVTCSDSDIMK.A + Oxidation (M)       |
|                                                                                                                                                                   | NP_564414    |            | ATSBT3.3; subtilase                 | A. thaliana | 442   |             |          | 644.8479 | 1287.6812  | 1287.6823 | -0.0010 | 0    | 29    | 1.5     | 1    | R.SFPTPTLGNK.V                        |
|                                                                                                                                                                   | NP_564414    |            | ATSBT3.3; subtilase                 | A. thaliana | 442   |             |          | 644.8483 | 1287.6820  | 1287.6823 | -0.0002 | 0    | (28)  | 1.9     | 1    | R.SFPTPTLGNK.V                        |
|                                                                                                                                                                   | NP_564414    |            | ATSBT3.3; subtilase                 | A. thaliana | 442   |             |          | 820.8810 | 1639.7474  | 1639.7478 | -0.0004 | 0    | 75    | 2.5e-05 | 1    | R.TDPGEQIAGSSRK                       |
|                                                                                                                                                                   | NP_564414    |            | ATSBT3.3; subtilase                 | A. thaliana | 442   |             |          | 669.6942 | 2006.0608  | 2006.0619 | -0.0011 | 0    | 39    | 0.093   | 1    | R.GPNSMSPALKPDAAGVR.I + Oxidation (M) |
| 3                                                                                                                                                                 | NP_197595    | A7S20950   | glycosyl hydrolase family 3 protein | A. thaliana | 931   | 19          | 31       | 343.1974 | 684.3802   | 684.3806  | -0.0004 | 0    | (28)  | 3.2     | 6    | R.DPNLVR.K                            |
|                                                                                                                                                                   | NP_197595    |            | glycosyl hydrolase family 3 protein | A. thaliana | 931   |             |          | 343.1974 | 684.3802   | 684.3806  | -0.0004 | 0    | (28)  | 2       | 6    | R.DPNLVR.K                            |
|                                                                                                                                                                   | NP_197595    |            | glycosyl hydrolase family 3 protein | A. thaliana | 931   |             |          | 343.1974 | 684.3802   | 684.3806  | -0.0004 | 0    | (24)  | 5.3     | 1    | R.DPNLVR.K                            |
|                                                                                                                                                                   | NP_197595    |            | glycosyl hydrolase family 3 protein | A. thaliana | 931   |             |          | 343.1974 | 684.3802   | 684.3806  | -0.0004 | 0    | (27)  | 2.6     | 6    | R.DPNLVR.K                            |
|                                                                                                                                                                   | NP_197595    |            | glycosyl hydrolase family 3 protein | A. thaliana | 931   |             |          | 343.1974 | 684.3802   | 684.3806  | -0.0004 | 0    | (28)  | 1.9     | 7    | R.DPNLVR.K                            |
|                                                                                                                                                                   | NP_197595    |            | glycosyl hydrolase family 3 protein | A. thaliana | 931   |             |          | 343.1974 | 684.3802   | 684.3806  | -0.0004 | 0    | (28)  | 2.2     | 7    | R.DPNLVR.K                            |
|                                                                                                                                                                   | NP_197595    |            | glycosyl hydrolase family 3 protein | A. thaliana | 931   |             |          | 343.1975 | 684.3804   | 684.3806  | -0.0002 | 0    | 33    | 0.66    | 1    | R.DPNLVR.K                            |
|                                                                                                                                                                   | NP_197595    |            | glycosyl hydrolase family 3 protein | A. thaliana | 931   |             |          | 400.7836 | 799.5526   | 799.5531  | -0.0005 | 1    | 40    | 0.14    | 2    | R.KSLVLLK.N                           |
|                                                                                                                                                                   | NP_197595    |            | glycosyl hydrolase family 3 protein | A. thaliana | 931   |             |          | 400.7837 | 799.5528   | 799.5531  | -0.0003 | 1    | (33)  | 0.78    | 1    | R.KSLVLLK.N                           |
|                                                                                                                                                                   | NP_197595    |            | glycosyl hydrolase family 3 protein | A. thaliana | 931   |             |          | 413.7788 | 825.5430   | 825.5436  | -0.0005 | 1    | (18)  | 15      | 1    | K.KLIPISR.I                           |
|                                                                                                                                                                   | NP_197595    |            | glycosyl hydrolase family 3 protein | A. thaliana | 931   |             |          | 413.7788 | 825.5430   | 825.5436  | -0.0005 | 1    | (19)  | 12      | 2    | K.KLIPISR.I                           |
|                                                                                                                                                                   | NP_197595    |            | glycosyl hydrolase family 3 protein | A. thaliana | 931   |             |          | 413.7789 | 825.5432   | 825.5436  | -0.0003 | 1    | (18)  | 15      | 2    | K.KLIPISR.J                           |
|                                                                                                                                                                   | NP_197595    |            | glycosyl hydrolase family 3 protein | A. thaliana | 931   |             |          | 413.7789 | 825.5432   | 825.5436  | -0.0003 | 1    | 31    | 0.8     | 1    | K.KLIPISR.J                           |
|                                                                                                                                                                   | NP_197595    |            | glycosyl hydrolase family 3 protein | A. thaliana | 931   |             |          | 444.7684 | 887.5222   | 887.5229  | -0.0007 | 1    | (42)  | 0.087   | 1    | R.KGVPPFVGK.T                         |
|                                                                                                                                                                   | NP_197595    |            | glycosyl hydrolase family 3 protein | A. thaliana | 931   |             |          | 444.7685 | 887.5224   | 887.5229  | -0.0005 | 1    | 45    | 0.053   | 1    | R.KGVPPFVGK.T                         |
|                                                                                                                                                                   | NP_197595    |            | glycosyl hydrolase family 3 protein | A. thaliana | 931   |             |          | 444.7685 | 887.5224   | 887.5229  | -0.0005 | 1    | (41)  | 0.13    | 1    | R.KGVPPFVGK.T                         |
|                                                                                                                                                                   | NP_197595    |            | glycosyl hydrolase family 3 protein | A. thaliana | 931   |             |          | 444.7686 | 887.5226   | 887.5229  | -0.0003 | 1    | (40)  | 0.17    | 1    | R.KGVPPFVGK.T                         |
|                                                                                                                                                                   | NP_197595    |            | glycosyl hydrolase family 3 protein | A. thaliana | 931   |             |          | 444.7688 | 887.5230   | 887.5229  | 0.0001  | 1    | (32)  | 0.88    | 1    | R.KGVPPFVGK.T                         |
|                                                                                                                                                                   | NP_197595    |            | glycosyl hydrolase family 3 protein | A. thaliana | 931   |             |          | 453.7681 | 905.5216   | 905.5222  | -0.0006 | 0    | (36)  | 0.34    | 1    | K.ELVTGFLK.N                          |
|                                                                                                                                                                   | NP_197595    |            | glycosyl hydrolase family 3 protein | A. thaliana | 931   |             |          | 453.7681 | 905.5216   | 905.5222  | -0.0006 | 0    | 43    | 0.065   | 1    | K.ELVTGFLK.N                          |
|                                                                                                                                                                   | NP_197595    |            | glycosyl hydrolase family 3 protein | A. thaliana | 931   |             |          | 453.7682 | 905.5218   | 905.5222  | -0.0004 | 0    | (12)  | 88      | 2    | K.ELVTGFLK.N                          |
|                                                                                                                                                                   | NP_197595    |            | glycosyl hydrolase family 3 protein | A. thaliana | 931   |             |          | 453.7683 | 905.5220   | 905.5222  | -0.0002 | 0    | (32)  | 0.83    | 2    | K.ELVTGFLK.N                          |
|                                                                                                                                                                   | NP_197595    |            | glycosyl hydrolase family 3 protein | A. thaliana | 931   |             |          | 453.7685 | 905.5224   | 905.5222  | 0.0002  | 0    | (29)  | 2       | 2    | K.ELVTGFLK.N                          |
|                                                                                                                                                                   | NP_197595    |            | glycosyl hydrolase family 3 protein | A. thaliana | 931   |             |          | 467.2500 | 932.4854   | 932.4862  | -0.0007 | 1    | (19)  | 18      | 6    | R.RDLMNLR.M + Oxidation (M)           |
|                                                                                                                                                                   | NP_197595    |            | glycosyl hydrolase family 3 protein | A. thaliana | 931   |             |          | 467.2502 | 932.4858   | 932.4862  | -0.0003 | 1    | (29)  | 2       | 1    | R.RDLMNLR.M + Oxidation (M)           |
|                                                                                                                                                                   | NP_197595    |            | glycosyl hydrolase family 3 protein | A. thaliana | 931   |             |          | 467.2502 | 932.4858   | 932.4862  | -0.0003 | 1    | 29    | 1.8     | 5    | R.RDLMNLR.M + Oxidation (M)           |
|                                                                                                                                                                   | NP_197595    |            | glycosyl hydrolase family 3 protein | A. thaliana | 931   |             |          | 511.8360 | 932.4862   | 932.4862  | 0.0000  | 1    | (19)  | 19      | 1    | R.RDLMNLR.M + Oxidation (M)           |
|                                                                                                                                                                   | NP_197595    |            | glycosyl hydrolase family 3 protein | A. thaliana | 931   |             |          | 481.2540 | 960.4934   | 960.4950  | -0.0016 | 0    | (20)  | 14      | 6    | R.SVATPEVMK.K                         |
|                                                                                                                                                                   | NP_197595    |            | glycosyl hydrolase family 3 protein | A. thaliana | 931   |             |          | 481.2544 | 960.4942   | 960.4950  | -0.0008 | 0    | (21)  | 13      | 7    | R.SVATPEVMK.K                         |
|                                                                                                                                                                   | NP_197595    |            | glycosyl hydrolase family 3 protein | A. thaliana | 931   |             |          | 481.2547 | 960.4948   | 960.4950  | -0.0002 | 0    | (13)  | 79      | 6    | R.SVATPEVMK.K                         |
|                                                                                                                                                                   | NP_197595    |            | glycosyl hydrolase family 3 protein | A. thaliana | 931   |             |          | 489.2518 | 976.4890   | 976.4899  | -0.0009 | 0    | 30    | 1.3     | 1    | R.SVATPEVMK.K + Oxidation (M)         |
|                                                                                                                                                                   | NP_197595    |            | glycosyl hydrolase family 3 protein | A. thaliana | 931   |             |          | 489.2519 | 976.4892   | 976.4899  | -0.0007 | 0    | (24)  | 5.9     | 1    | R.SVATPEVMK.K + Oxidation (M)         |
|                                                                                                                                                                   | NP_197595    |            | glycosyl hydrolase family 3 protein | A. thaliana | 931   |             |          | 500.7923 | 999.5700   | 999.5713  | -0.0012 | 0    | (78)  | 1.8e-05 | 1    | R.IGAATLEVR.A                         |
|                                                                                                                                                                   | NP_197595    |            | glycosyl hydrolase family 3 protein | A. thaliana | 931   |             |          | 500.7927 | 999.5708   | 999.5713  | -0.0004 | 0    | (58)  | 0.002   | 1    | R.IGAATLEVR.A                         |
|                                                                                                                                                                   | NP_197595    |            | glycosyl hydrolase family 3 protein | A. thaliana | 931   |             |          | 500.7928 | 999.5710   | 999.5713  | -0.0002 | 0    | 85    | 3.4e-06 | 1    | R.IGAATLEVR.A                         |
|                                                                                                                                                                   | NP_197595    |            | glycosyl hydrolase family 3 protein | A. thaliana | 931   |             |          | 522.7643 | 1043.5140  | 1043.5149 | -0.0008 | 0    | (21)  | 11      | 1    | K.HFVDDGGTVR.G                        |
|                                                                                                                                                                   | NP_197595    |            | glycosyl hydrolase family 3 protein | A. thaliana | 931   |             |          | 522.7643 | 1043.5140  | 1043.5149 | -0.0008 | 0    | (33)  | 0.73    | 1    | K.HFVDDGGTVR.G                        |
|                                                                                                                                                                   | NP_197595    |            | glycosyl hydrolase family 3 protein | A. thaliana | 931   |             |          | 522.7643 | 1043.5140  | 1043.5149 | -0.0008 | 0    | (32)  | 0.91    | 1    | K.HFVDDGGTVR.G                        |
|                                                                                                                                                                   | NP_197595    |            | glycosyl hydrolase family 3 protein | A. thaliana | 931   |             |          | 522.7644 | 1043.5142  | 1043.5149 | -0.0006 | 0    | (36)  | 0.36    | 1    | K.HFVDDGGTVR.G                        |
|                                                                                                                                                                   | NP_197595    |            | glycosyl hydrolase family 3 protein | A. thaliana | 931   |             |          | 522.7645 | 1043.5144  | 1043.5149 | -0.0004 | 0    | 37    | 0.25    | 1    | K.HFVDDGGTVR.G                        |
|                                                                                                                                                                   | NP_197595    |            | glycosyl hydrolase family 3 protein | A. thaliana | 931   |             |          | 522.7646 | 1043.5146  | 1043.5149 | -0.0002 | 0    | (24)  | 5.8     | 1    | K.HFVDDGGTVR.G                        |
|                                                                                                                                                                   | NP_197595    |            | glycosyl hydrolase family 3 protein | A. thaliana | 931   |             |          | 523.2580 | 1044.5014  | 1044.5022 | -0.0008 | 0    | 16    | 35      | 1    | K.QLPMNVGDR.H + Oxidation (M)         |
|                                                                                                                                                                   | NP_197595    |            | glycosyl hydrolase family 3 protein | A. thaliana | 931   |             |          | 523.2582 | 1044.5018  | 1044.5022 | -0.0004 | 0    | (11)  | 1.1e+02 | 7    | K.QLPMNVGDR.H + Oxidation (M)         |
|                                                                                                                                                                   | NP_197595    |            | glycosyl hydrolase family 3 protein | A. thaliana | 931   |             |          | 537.2920 | 1072.5694  | 1072.5699 | -0.0005 | 0    | 61    | 0.00098 | 1    | K.IGQVMQIER.S                         |
|                                                                                                                                                                   | NP_197595    |            | glycosyl hydrolase family 3 protein | A. thaliana | 931   |             |          | 537.2923 | 1072.5700  | 1072.5699 | 0.0001  | 0    | (68)  | 0.002   | 1    | K.IGQVMQIER.S                         |
|                                                                                                                                                                   | NP_197595    |            | glycosyl hydrolase family 3 protein | A. thaliana | 931   |             |          | 545.2892 | 1088.5638  | 1088.5648 | -0.0010 | 0    | (49)  | 0.017   | 1    | K.IGQVMQIER.S + Oxidation (M)         |
|                                                                                                                                                                   | NP_197595    |            | glycosyl hydrolase family 3 protein | A. thaliana | 931   |             |          | 545.2894 | 1088.5642  | 1088.5648 | -0.0006 | 0    | (39)  | 0.17    | 1    | K.IGQVMQIER.S + Oxidation (M)         |
|                                                                                                                                                                   | NP_197595    |            | glycosyl hydrolase family 3 protein | A. thaliana | 931   |             |          | 545.2894 | 1088.5642  | 1088.5648 | -0.0006 | 0    | (48)  | 0.02    | 1    | K.IGQVMQIER.S + Oxidation (M)         |
|                                                                                                                                                                   | NP_197595    |            | glycosyl hydrolase family 3 protein | A. thaliana | 931   |             |          | 545.2896 | 1088.5646  | 1088.5648 | -0.0002 | 0    | (27)  | 2.4     | 1    | K.IGQVMQIER.S + Oxidation (M)         |
|                                                                                                                                                                   | NP_197595    |            | glycosyl hydrolase family 3 protein | A. thaliana | 931   |             |          | 545.2922 | 1088.5698  | 1088.5900 | 0.0001  | 1    | (20)  | 12      | 2    | R.SVATPEVMK.Y                         |
|                                                                                                                                                                   | NP_197595    |            | glycosyl hydrolase family 3 protein | A. thaliana | 931   |             |          | 553.2992 | 1104.5838  | 1         |         |      |       |         |      |                                       |

|           |           |                                                                       |                                                                       |             |     |    |           |           |           |          |         |      |         |      |                                        |            |
|-----------|-----------|-----------------------------------------------------------------------|-----------------------------------------------------------------------|-------------|-----|----|-----------|-----------|-----------|----------|---------|------|---------|------|----------------------------------------|------------|
| NP_197595 |           | glycosyl hydrolase family 3 protein                                   | A. thaliana                                                           | 931         |     |    | 567.8655  | 1133.7164 | 1133.7172 | -0.0008  | 0       | 24   | 4.9     | 3    | K.TGAKLLPLPK.K                         |            |
| NP_197595 |           | glycosyl hydrolase family 3 protein                                   | A. thaliana                                                           | 931         |     |    | 578.8433  | 1155.6720 | 1155.6724 | -0.0003  | 1       | (21) | 9.2     | 1    | K.RIGATAALEV.R.A                       |            |
| NP_197595 |           | glycosyl hydrolase family 3 protein                                   | A. thaliana                                                           | 931         |     |    | 578.8433  | 1155.6720 | 1155.6724 | -0.0003  | 1       | 32   | 0.79    | 1    | K.RIGATAALEV.R.A                       |            |
| NP_197595 |           | glycosyl hydrolase family 3 protein                                   | A. thaliana                                                           | 931         |     |    | 686.2612  | 1370.5078 | 1370.5085 | -0.0006  | 0       | 73   | 5.7e-05 | 1    | R.CYESYSEYV.R.I                        |            |
| NP_197595 |           | glycosyl hydrolase family 3 protein                                   | A. thaliana                                                           | 931         |     |    | 696.8484  | 1391.6822 | 1391.6834 | -0.0011  | 0       | 65   | 0.00034 | 1    | R.GFVSDWGQD.R.I                        |            |
| NP_197595 |           | glycosyl hydrolase family 3 protein                                   | A. thaliana                                                           | 931         |     |    | 696.8484  | 1391.6822 | 1391.6834 | -0.0011  | 0       | (68) | 0.0018  | 1    | R.GFVSDWGQD.R.I                        |            |
| NP_197595 |           | glycosyl hydrolase family 3 protein                                   | A. thaliana                                                           | 931         |     |    | 883.9391  | 1765.8636 | 1765.8644 | -0.0007  | 0       | 50   | 0.0094  | 1    | R.ATGTPYAFAPCI.V.C.R.D                 |            |
| NP_197595 |           | glycosyl hydrolase family 3 protein                                   | A. thaliana                                                           | 931         |     |    | 898.9422  | 1795.8698 | 1795.8716 | -0.0017  | 0       | (43) | 0.048   | 1    | K.GLFGHMPGYNAVNK.G + Oxidation (M)     |            |
| NP_197595 |           | glycosyl hydrolase family 3 protein                                   | A. thaliana                                                           | 931         |     |    | 599.6306  | 1795.8700 | 1795.8716 | -0.0016  | 0       | (61) | 0.0079  | 1    | K.GLFGHMPGYNAVNK.G + Oxidation (M)     |            |
| NP_197595 |           | glycosyl hydrolase family 3 protein                                   | A. thaliana                                                           | 931         |     |    | 898.9424  | 1795.8702 | 1795.8716 | -0.0013  | 0       | 54   | 0.0038  | 1    | K.GLFGHMPGYNAVNK.G + Oxidation (M)     |            |
| NP_197595 |           | glycosyl hydrolase family 3 protein                                   | A. thaliana                                                           | 931         |     |    | 898.9426  | 1795.8706 | 1795.8716 | -0.0009  | 0       | (43) | 0.046   | 1    | K.GLFGHMPGYNAVNK.G + Oxidation (M)     |            |
| NP_197595 |           | glycosyl hydrolase family 3 protein                                   | A. thaliana                                                           | 931         |     |    | 599.6313  | 1795.8721 | 1795.8716 | 0.0005   | 0       | (37) | 0.2     | 1    | K.GLFGHMPGYNAVNK.G + Oxidation (M)     |            |
| NP_197595 |           | glycosyl hydrolase family 3 protein                                   | A. thaliana                                                           | 931         |     |    | 599.6313  | 1795.8721 | 1795.8716 | 0.0005   | 0       | (33) | 0.48    | 1    | K.GLFGHMPGYNAVNK.G + Oxidation (M)     |            |
| NP_197595 |           | glycosyl hydrolase family 3 protein                                   | A. thaliana                                                           | 931         |     |    | 751.7470  | 2252.1192 | 2252.2198 | -0.0007  | 1       | 42   | 0.035   | 1    | R.HQGMTEIPLSQDGLRTRK.R + Oxidation (M) |            |
| NP_197595 |           | glycosyl hydrolase family 3 protein                                   | A. thaliana                                                           | 931         |     |    | 765.0529  | 2292.1369 | 2292.1366 | -0.0018  | 0       | (50) | 0.0066  | 1    | K.NTAVPTQVWVYNSONPDANFVK.S             |            |
| NP_197595 |           | glycosyl hydrolase family 3 protein                                   | A. thaliana                                                           | 931         |     |    | 1147.0780 | 2292.1374 | 2292.1366 | -0.0012  | 0       | 103  | 2.9e-08 | 1    | K.NTAVPTQVWVYNSONPDANFVK.S             |            |
| NP_197595 |           | glycosyl hydrolase family 3 protein                                   | A. thaliana                                                           | 931         |     |    | 1147.0780 | 2292.1374 | 2292.1366 | -0.0012  | 0       | (80) | 6.2e-08 | 1    | K.NTAVPTQVWVYNSONPDANFVK.S             |            |
| NP_197595 |           | glycosyl hydrolase family 3 protein                                   | A. thaliana                                                           | 931         |     |    | 1147.0780 | 2292.1374 | 2292.1366 | -0.0012  | 0       | (84) | 2.4e-08 | 1    | K.NTAVPTQVWVYNSONPDANFVK.S             |            |
| NP_197595 |           | glycosyl hydrolase family 3 protein                                   | A. thaliana                                                           | 931         |     |    | 765.0533  | 2292.1381 | 2292.1366 | -0.0006  | 0       | (64) | 0.00027 | 1    | K.NTAVPTQVWVYNSONPDANFVK.S             |            |
| 4         | NP_177743 | AT4G12420                                                             | SK55 copper ion binding / oxidoreductase                              | A. thaliana | 673 | 15 | 25        | 361.6949  | 721.3752  | 721.3759 | -0.0006 | 0    | (31)    | 0.88 | 1                                      | K.IDGVYR.S |
| NP_177743 |           | SK55 copper ion binding / oxidoreductase                              | A. thaliana                                                           | 673         |     |    | 361.6950  | 721.3754  | 721.3759  | -0.0004  | 0       | (34) | 0.48    | 1    | K.IDGVYR.S                             |            |
| NP_177743 |           | SK55 copper ion binding / oxidoreductase                              | A. thaliana                                                           | 673         |     |    | 361.6950  | 721.3754  | 721.3759  | -0.0004  | 0       | 34   | 0.43    | 1    | K.IDGVYR.S                             |            |
| NP_177743 |           | SK55 copper ion binding / oxidoreductase                              | A. thaliana                                                           | 673         |     |    | 361.6952  | 721.3758  | 721.3759  | -0.0000  | 0       | (28) | 1.7     | 1    | K.IDGVYR.S                             |            |
| NP_177743 |           | SK55 copper ion binding / oxidoreductase                              | A. thaliana                                                           | 673         |     |    | 371.2398  | 740.4650  | 740.4657  | -0.0006  | 0       | (26) | 2       | 5    | R.I.R.S.PP.R.I                         |            |
| NP_177743 |           | SK55 copper ion binding / oxidoreductase                              | A. thaliana                                                           | 673         |     |    | 371.2399  | 740.4652  | 740.4657  | -0.0004  | 0       | (27) | 1.6     | 5    | R.I.R.S.PP.R.I                         |            |
| NP_177743 |           | SK55 copper ion binding / oxidoreductase                              | A. thaliana                                                           | 673         |     |    | 371.2400  | 740.4654  | 740.4657  | -0.0002  | 0       | 29   | 1.1     | 5    | R.I.R.S.PP.R.I                         |            |
| NP_177743 |           | SK55 copper ion binding / oxidoreductase                              | A. thaliana                                                           | 673         |     |    | 378.6998  | 755.3850  | 755.3854  | -0.0003  | 0       | (20) | 12      | 6    | K.IADYFK.I                             |            |
| NP_177743 |           | SK55 copper ion binding / oxidoreductase                              | A. thaliana                                                           | 673         |     |    | 378.6998  | 755.3850  | 755.3854  | -0.0003  | 0       | 28   | 1.6     | 3    | K.IADYFK.I                             |            |
| NP_177743 |           | SK55 copper ion binding / oxidoreductase                              | A. thaliana                                                           | 673         |     |    | 378.6999  | 755.3852  | 755.3854  | -0.0001  | 0       | (18) | 16      | 9    | K.IADYFK.I                             |            |
| NP_177743 |           | SK55 copper ion binding / oxidoreductase                              | A. thaliana                                                           | 673         |     |    | 378.7000  | 755.3854  | 755.3854  | 0.0001   | 0       | (18) | 18      | 7    | K.IADYFK.I                             |            |
| NP_177743 |           | SK55 copper ion binding / oxidoreductase                              | A. thaliana                                                           | 673         |     |    | 398.1927  | 794.3708  | 794.3711  | -0.0003  | 0       | 17   | 23      | 1    | R.SEFWAR.Q                             |            |
| NP_177743 |           | SK55 copper ion binding / oxidoreductase                              | A. thaliana                                                           | 673         |     |    | 402.2130  | 802.4114  | 802.4119  | -0.0005  | 0       | 44   | 0.066   | 1    | K.NALLCGR.A                            |            |
| NP_177743 |           | SK55 copper ion binding / oxidoreductase                              | A. thaliana                                                           | 673         |     |    | 402.2133  | 802.4114  | 802.4119  | 0.0001   | 0       | (22) | 12      | 1    | K.NALLCGR.A                            |            |
| NP_177743 |           | SK55 copper ion binding / oxidoreductase                              | A. thaliana                                                           | 673         |     |    | 402.2138  | 802.4130  | 802.4119  | 0.0011   | 0       | (29) | 2.1     | 1    | K.NALLCGR.A                            |            |
| NP_177743 |           | SK55 copper ion binding / oxidoreductase                              | A. thaliana                                                           | 673         |     |    | 403.2191  | 804.4236  | 804.4242  | -0.0006  | 0       | (44) | 0.097   | 1    | K.AAGFGGIR.I                           |            |
| NP_177743 |           | SK55 copper ion binding / oxidoreductase                              | A. thaliana                                                           | 673         |     |    | 403.2192  | 804.4238  | 804.4242  | -0.0004  | 0       | (29) | 2.6     | 1    | K.AAGFGGIR.I                           |            |
| NP_177743 |           | SK55 copper ion binding / oxidoreductase                              | A. thaliana                                                           | 673         |     |    | 403.2192  | 804.4238  | 804.4242  | -0.0004  | 0       | 52   | 0.013   | 1    | K.AAGFGGIR.I                           |            |
| NP_177743 |           | SK55 copper ion binding / oxidoreductase                              | A. thaliana                                                           | 673         |     |    | 403.2193  | 804.4240  | 804.4242  | -0.0002  | 0       | (52) | 0.014   | 1    | K.AAGFGGIR.I                           |            |
| NP_177743 |           | SK55 copper ion binding / oxidoreductase                              | A. thaliana                                                           | 673         |     |    | 404.7007  | 807.3868  | 807.3875  | -0.0006  | 0       | (13) | 86      | 8    | R.K.NEYLD.R.A                          |            |
| NP_177743 |           | SK55 copper ion binding / oxidoreductase                              | A. thaliana                                                           | 673         |     |    | 404.7008  | 807.3870  | 807.3875  | -0.0004  | 0       | 15   | 62      | 6    | R.NEYLD.R.A                            |            |
| NP_177743 |           | SK55 copper ion binding / oxidoreductase                              | A. thaliana                                                           | 673         |     |    | 431.2211  | 860.4276  | 860.4280  | -0.0003  | 0       | (13) | 85      | 2    | R.DEYPIK.N                             |            |
| NP_177743 |           | SK55 copper ion binding / oxidoreductase                              | A. thaliana                                                           | 673         |     |    | 431.2213  | 860.4280  | 860.4280  | 0.0001   | 0       | 16   | 36      | 1    | R.DEYPIK.N                             |            |
| NP_177743 |           | SK55 copper ion binding / oxidoreductase                              | A. thaliana                                                           | 673         |     |    | 512.2764  | 1022.5382 | 1022.5397 | -0.0014  | 0       | (28) | 2       | 1    | R.VYTPSLR.D                            |            |
| NP_177743 |           | SK55 copper ion binding / oxidoreductase                              | A. thaliana                                                           | 673         |     |    | 512.2769  | 1022.5392 | 1022.5397 | -0.0004  | 0       | (19) | 16      | 6    | R.VYTPSLR.D                            |            |
| NP_177743 |           | SK55 copper ion binding / oxidoreductase                              | A. thaliana                                                           | 673         |     |    | 512.2769  | 1022.5392 | 1022.5397 | -0.0004  | 0       | (32) | 0.88    | 1    | R.VYTPSLR.D                            |            |
| NP_177743 |           | SK55 copper ion binding / oxidoreductase                              | A. thaliana                                                           | 673         |     |    | 512.2769  | 1022.5392 | 1022.5397 | -0.0004  | 0       | 32   | 0.88    | 1    | R.VYTPSLR.D                            |            |
| NP_177743 |           | SK55 copper ion binding / oxidoreductase                              | A. thaliana                                                           | 673         |     |    | 516.7692  | 1031.5238 | 1031.5247 | -0.0009  | 0       | (44) | 0.056   | 1    | R.LASSAGQVDGK.Q                        |            |
| NP_177743 |           | SK55 copper ion binding / oxidoreductase                              | A. thaliana                                                           | 673         |     |    | 516.7692  | 1031.5238 | 1031.5247 | -0.0009  | 0       | (45) | 0.048   | 1    | R.LASSAGQVDGK.Q                        |            |
| NP_177743 |           | SK55 copper ion binding / oxidoreductase                              | A. thaliana                                                           | 673         |     |    | 516.7693  | 1031.5240 | 1031.5247 | -0.0007  | 0       | (61) | 0.001   | 1    | R.LASSAGQVDGK.Q                        |            |
| NP_177743 |           | SK55 copper ion binding / oxidoreductase                              | A. thaliana                                                           | 673         |     |    | 516.7694  | 1031.5242 | 1031.5247 | -0.0005  | 0       | 63   | 0.00065 | 1    | R.LASSAGQVDGK.Q                        |            |
| NP_177743 |           | SK55 copper ion binding / oxidoreductase                              | A. thaliana                                                           | 673         |     |    | 516.7695  | 1031.5244 | 1031.5247 | -0.0003  | 0       | (46) | 0.032   | 1    | R.LASSAGQVDGK.Q                        |            |
| NP_177743 |           | SK55 copper ion binding / oxidoreductase                              | A. thaliana                                                           | 673         |     |    | 516.7696  | 1031.5246 | 1031.5247 | -0.0001  | 0       | (48) | 0.021   | 1    | R.LASSAGQVDGK.Q                        |            |
| NP_177743 |           | SK55 copper ion binding / oxidoreductase                              | A. thaliana                                                           | 673         |     |    | 544.2738  | 1086.5330 | 1086.5346 | -0.0015  | 0       | (44) | 0.044   | 1    | R.DYVVVSSR.F                           |            |
| NP_177743 |           | SK55 copper ion binding / oxidoreductase                              | A. thaliana                                                           | 673         |     |    | 544.2741  | 1086.5336 | 1086.5346 | -0.0009  | 0       | (38) | 0.19    | 2    | R.DYVVVSSR.F                           |            |
| NP_177743 |           | SK55 copper ion binding / oxidoreductase                              | A. thaliana                                                           | 673         |     |    | 544.2742  | 1086.5338 | 1086.5346 | -0.0007  | 0       | 50   | 0.012   | 1    | R.DYVVVSSR.F                           |            |
| NP_177743 |           | SK55 copper ion binding / oxidoreductase                              | A. thaliana                                                           | 673         |     |    | 544.2745  | 1086.5344 | 1086.5346 | -0.0001  | 0       | (43) | 0.058   | 1    | R.DYVVVSSR.F                           |            |
| NP_177743 |           | SK55 copper ion binding / oxidoreductase                              | A. thaliana                                                           | 673         |     |    | 595.8033  | 1189.5920 | 1189.5939 | -0.0018  | 0       | (64) | 0.00049 | 1    | R.SSGATLNVEQGT.T                       |            |
| NP_177743 |           | SK55 copper ion binding / oxidoreductase                              | A. thaliana                                                           | 673         |     |    | 595.8038  | 1189.5930 | 1189.5939 | -0.0008  | 0       | (68) | 0.0002  | 1    | R.SSGATLNVEQGT.T                       |            |
| NP_177743 |           | SK55 copper ion binding / oxidoreductase                              | A. thaliana                                                           | 673         |     |    | 595.8039  | 1189.5932 | 1189.5939 | -0.0006  | 0       | (67) | 0.00023 | 1    | R.SSGATLNVEQGT.T                       |            |
| NP_177743 |           | SK55 copper ion binding / oxidoreductase                              | A. thaliana                                                           | 673         |     |    | 595.8040  | 1189.5934 | 1189.5939 | -0.0004  | 0       | 78   | 2e-05   | 1    | R.SSGATLNVEQGT.T                       |            |
| NP_177743 |           | SK55 copper ion binding / oxidoreductase                              | A. thaliana                                                           | 673         |     |    | 728.8929  | 1455.7712 | 1455.7722 | -0.0010  | 0       | 68   | 0.00018 | 1    | R.FTNSLVTTTGF.R.Y                      |            |
| NP_177743 |           | SK55 copper ion binding / oxidoreductase                              | A. thaliana                                                           | 673         |     |    | 731.8857  | 1461.7568 | 1461.7576 | -0.0007  | 0       | 79   | 1.4e-05 | 1    | R.ISNVLQDLSL.N.R.I                     |            |
| NP_177743 |           | SK55 copper ion binding / oxidoreductase                              | A. thaliana                                                           | 673         |     |    | 868.9635  | 1735.9124 | 1735.9145 | -0.0020  | 0       | 41   | 0.063   | 1    | R.YAVNSYFKPQDPLTK.I                    |            |
| NP_177743 |           | SK55 copper ion binding / oxidoreductase                              | A. thaliana                                                           | 673         |     |    | 879.8453  | 1735.9141 | 1735.9145 | -0.0004  | 0       | (38) | 0.15    | 1    | R.YAVNSYFKPQDPLTK.I                    |            |
| NP_177743 |           | SK55 copper ion binding / oxidoreductase                              | A. thaliana                                                           | 673         |     |    | 879.8454  | 1735.9144 | 1735.9145 | -0.0001  | 0       | (34) | 0.32    | 1    | R.YAVNSYFKPQDPLTK.I                    |            |
| NP_177743 |           | SK55 copper ion binding / oxidoreductase                              | A. thaliana                                                           | 673         |     |    | 888.9645  | 1735.9144 | 1735.9145 | -0.0000  | 0       | (38) | 0.12    | 1    | R.YAVNSYFKPQDPLTK.I                    |            |
| NP_177743 |           | SK55 copper ion binding / oxidoreductase                              | A. thaliana                                                           | 673         |     |    | 888.9646  | 1735.9146 | 1735.9145 | 0.0002   | 0       | (32) | 0.57    | 1    | R.YAVNSYFKPQDPLTK.I                    |            |
| NP_177743 |           | SK55 copper ion binding / oxidoreductase                              | A. thaliana                                                           | 673         |     |    | 879.8457  | 1735.9153 | 1735.9145 | 0.0008   | 0       | (31) | 0.62    | 1    | R.YAVNSYFKPQDPLTK.I                    |            |
| NP_177743 |           | SK55 copper ion binding / oxidoreductase                              | A. thaliana                                                           | 673         |     |    | 933.4835  | 1864.9524 | 1864.9571 | -0.0046  | 1       | (24) | 3.3     | 1    | R.VYTPSLRDEYPIK.N                      |            |
| NP_177743 |           | SK55 copper ion binding / oxidoreductase                              | A. thaliana                                                           | 673         |     |    | 933.4854  | 1864.9562 | 1864.9571 | -0.0008  | 1       | 26   | 2.2     | 1    | R.VYTPSLRDEYPIK.N                      |            |
| 4         | NP_199747 | AT5G49360                                                             | BX1L (BETA-XYLOSIDASE 1); hydrolase, hydrolyzing O-glycosyl compounds | A. thaliana | 393 | 9  | 11        | 382.1980  | 762.3814  | 762.3813 | 0.0001  | 0    | 17      | 32   | 10                                     | R.FHNAK.V  |
| NP_199747 |           | BX1L (BETA-XYLOSIDASE 1); hydrolase, hydrolyzing O-glycosyl compounds | A. thaliana                                                           | 393         |     |    | 400.7346  | 799.4546  | 799.4552  | -0.0006  | 0       | 32   | 0.97    | 1    | R.VODLLGR.L                            |            |
| NP_199747 |           | BX1L (BETA-XYLOSIDASE 1); hydrolase, hydrolyzing O-glycosyl compounds | A. thaliana                                                           | 393         |     |    | 400.7347  | 799.4548  | 799.4552  | -0.0004  | 0       | (31) | 1.1     | 1    | R.VODLLGR.L                            |            |
| NP_199747 |           | BX1L (BETA-XYLOSIDASE 1); hydrolase, hydrolyzing O-glycosyl compounds | A. thaliana                                                           | 393         |     |    | 415.2136  | 828.4126  | 828.4130  | -0.0003  | 0       | (25) | 5.1     | 1    | K.YAASYR.G                             |            |
| NP_199747 |           | BX1L (BETA-XYLOSIDASE 1); hydrolase, hydrolyzing O-glycosyl compounds | A. thaliana                                                           | 393         |     |    | 415.2138  | 828.4130  | 828.4130  | 0.0001   | 0       | 31   | 1.1     | 1    | K.YAASYR.G                             |            |
| NP_199747 |           | BX1L (BETA-XYLOSIDASE 1); hydrolase, hydrolyzing O-glycosyl compounds | A. thaliana                                                           | 393         |     |    | 453.2689  | 904.5232  | 904.5243  | -0.0010  | 0       | 31   | 1.4     | 1    | R.ANVPIHR.V                            |            |
| NP_199747 |           | BX1L (BETA-XYLOSIDASE 1); hydrolase, hydrolyzing O-glycosyl compounds | A. thaliana                                                           | 393         |     |    | 453.2693  | 904.5240  | 904.5243  | -0.0002  | 0       | (28) | 2.9     | 1    | R.ANVPIHR.V                            |            |
| NP_199747 |           | BX1L (BETA-XYLOSIDASE 1); hydrolase, hydrolyzing O-glycosyl compounds | A. thaliana                                                           | 393         |     |    | 542.2531  | 1082.4916 | 1082.4923 | -0.0006  | 0       | (19) | 14      | 2    | K.VPMTVMAMIR.A + 3 Oxidation (M)       |            |
| NP_199747 |           | BX                                                                    |                                                                       |             |     |    |           |           |           |          |         |      |         |      |                                        |            |



|             |           |                                                       |             |     |    |           |           |           |          |         |      |         |      |                                |             |
|-------------|-----------|-------------------------------------------------------|-------------|-----|----|-----------|-----------|-----------|----------|---------|------|---------|------|--------------------------------|-------------|
| NP 188436   |           | glycosyl hydrolase family 1 protein                   | A. thaliana | 771 |    | 429.7249  | 857.4352  | 857.4355  | -0.0003  | 0       | (43) | 0.081   | 1    | K.ADN.LAAQR.A                  |             |
| NP 188436   |           | glycosyl hydrolase family 1 protein                   | A. thaliana | 771 |    | 429.7249  | 857.4352  | 857.4355  | -0.0003  | 0       | (55) | 0.0046  | 1    | K.ADN.LAAQR.A                  |             |
| NP 188436   |           | glycosyl hydrolase family 1 protein                   | A. thaliana | 771 |    | 429.7249  | 857.4352  | 857.4355  | -0.0003  | 0       | (59) | 0.0017  | 1    | K.ADN.LAAQR.A                  |             |
| NP 188436   |           | glycosyl hydrolase family 1 protein                   | A. thaliana | 771 |    | 429.7249  | 857.4352  | 857.4355  | -0.0003  | 0       | (62) | 0.001   | 1    | K.ADN.LAAQR.A                  |             |
| NP 188436   |           | glycosyl hydrolase family 1 protein                   | A. thaliana | 771 |    | 429.7249  | 857.4352  | 857.4355  | -0.0003  | 0       | (55) | 0.0049  | 1    | K.ADN.LAAQR.A                  |             |
| NP 188436   |           | glycosyl hydrolase family 1 protein                   | A. thaliana | 771 |    | 429.7249  | 857.4352  | 857.4355  | -0.0003  | 0       | 73   | 8.2e-05 | 1    | K.ADN.LAAQR.A                  |             |
| NP 188436   |           | glycosyl hydrolase family 1 protein                   | A. thaliana | 771 |    | 429.7249  | 857.4352  | 857.4355  | -0.0003  | 0       | (65) | 0.005   | 1    | K.ADN.LAAQR.A                  |             |
| NP 188436   |           | glycosyl hydrolase family 1 protein                   | A. thaliana | 771 |    | 429.7249  | 857.4352  | 857.4355  | -0.0003  | 0       | (68) | 0.0022  | 1    | K.ADN.LAAQR.A                  |             |
| NP 188436   |           | glycosyl hydrolase family 1 protein                   | A. thaliana | 771 |    | 429.7249  | 857.4352  | 857.4355  | -0.0003  | 0       | (69) | 0.0018  | 1    | K.ADN.LAAQR.A                  |             |
| NP 188436   |           | glycosyl hydrolase family 1 protein                   | A. thaliana | 771 |    | 429.7249  | 857.4352  | 857.4355  | -0.0003  | 0       | (65) | 0.00043 | 1    | K.ADN.LAAQR.A                  |             |
| NP 188436   |           | glycosyl hydrolase family 1 protein                   | A. thaliana | 771 |    | 429.7249  | 857.4352  | 857.4355  | -0.0003  | 0       | (68) | 0.0022  | 1    | K.ADN.LAAQR.A                  |             |
| NP 188436   |           | glycosyl hydrolase family 1 protein                   | A. thaliana | 771 |    | 429.7249  | 857.4352  | 857.4355  | -0.0003  | 0       | (55) | 0.0049  | 1    | K.ADN.LAAQR.A                  |             |
| NP 188436   |           | glycosyl hydrolase family 1 protein                   | A. thaliana | 771 |    | 429.7249  | 857.4352  | 857.4355  | -0.0003  | 0       | (62) | 0.00096 | 1    | K.ADN.LAAQR.A                  |             |
| NP 188436   |           | glycosyl hydrolase family 1 protein                   | A. thaliana | 771 |    | 429.7249  | 857.4352  | 857.4355  | -0.0003  | 0       | (44) | 0.13    | 1    | K.ADN.LAAQR.A                  |             |
| NP 188436   |           | glycosyl hydrolase family 1 protein                   | A. thaliana | 771 |    | 429.7250  | 857.4354  | 857.4355  | -0.0001  | 0       | (55) | 0.0043  | 1    | K.ADN.LAAQR.A                  |             |
| NE 188436   |           | glycosyl hydrolase family 1 protein                   | A. thaliana | 771 |    | 429.7251  | 857.4356  | 857.4355  | 0.0001   | 0       | (51) | 0.011   | 1    | K.ADN.LAAQR.A                  |             |
| NP 188436   |           | glycosyl hydrolase family 1 protein                   | A. thaliana | 771 |    | 433.7342  | 865.4538  | 865.4545  | -0.0007  | 0       | (16) | 32      | 2    | K.DYLN.LK.K                    |             |
| NP 188436   |           | glycosyl hydrolase family 1 protein                   | A. thaliana | 771 |    | 433.7342  | 865.4538  | 865.4545  | -0.0007  | 0       | 27   | 2       | 2    | K.DYLN.LK.K                    |             |
| NP 188436   |           | glycosyl hydrolase family 1 protein                   | A. thaliana | 771 |    | 433.7344  | 865.4542  | 865.4545  | -0.0003  | 0       | (18) | 16      | 3    | K.DYLN.LK.K                    |             |
| NP 188436   |           | glycosyl hydrolase family 1 protein                   | A. thaliana | 771 |    | 449.7242  | 897.4338  | 897.4344  | -0.0006  | 0       | (17) | 35      | 2    | K.LNFDAYR.F                    |             |
| NP 188436   |           | glycosyl hydrolase family 1 protein                   | A. thaliana | 771 |    | 449.7242  | 897.4338  | 897.4344  | -0.0006  | 0       | (33) | 0.85    | 1    | K.LNFDAYR.F                    |             |
| NP 188436   |           | glycosyl hydrolase family 1 protein                   | A. thaliana | 771 |    | 449.7243  | 897.4340  | 897.4344  | -0.0004  | 0       | 39   | 0.22    | 1    | K.LNFDAYR.F                    |             |
| NP 188436   |           | glycosyl hydrolase family 1 protein                   | A. thaliana | 771 |    | 449.7243  | 897.4340  | 897.4344  | -0.0004  | 0       | (37) | 0.31    | 1    | K.LNFDAYR.F                    |             |
| NP 188436   |           | glycosyl hydrolase family 1 protein                   | A. thaliana | 771 |    | 449.7246  | 897.4346  | 897.4344  | 0.0002   | 0       | (19) | 20      | 1    | K.LNFDAYR.F                    |             |
| NP 188436   |           | glycosyl hydrolase family 1 protein                   | A. thaliana | 771 |    | 457.2153  | 912.4160  | 912.4164  | -0.0003  | 0       | 24   | 4.6     | 1    | K.M.SAQWFK.Q + Oxidation (M)   |             |
| NP 188436   |           | glycosyl hydrolase family 1 protein                   | A. thaliana | 771 |    | 497.7816  | 993.5486  | 993.5495  | -0.0008  | 1       | (18) | 16      | 5    | K.DYLN.LK.K                    |             |
| NP 188436   |           | glycosyl hydrolase family 1 protein                   | A. thaliana | 771 |    | 497.7817  | 993.5488  | 993.5495  | -0.0006  | 1       | (22) | 6.7     | 5    | K.DYLN.LK.K                    |             |
| NP 188436   |           | glycosyl hydrolase family 1 protein                   | A. thaliana | 771 |    | 497.7818  | 993.5490  | 993.5495  | -0.0004  | 1       | (21) | 9.3     | 9    | K.DYLN.LK.K                    |             |
| NP 188436   |           | glycosyl hydrolase family 1 protein                   | A. thaliana | 771 |    | 497.7818  | 993.5490  | 993.5495  | -0.0004  | 1       | 24   | 4.1     | 2    | K.DYLN.LK.K                    |             |
| NP 188436   |           | glycosyl hydrolase family 1 protein                   | A. thaliana | 771 |    | 497.7821  | 993.5496  | 993.5495  | 0.0002   | 1       | (9)  | 1.3e+02 | 4    | K.DYLN.LK.K                    |             |
| NP 188436   |           | glycosyl hydrolase family 1 protein                   | A. thaliana | 771 |    | 497.7824  | 993.5502  | 993.5495  | 0.0008   | 1       | (15) | 36      | 5    | K.DYLN.LK.K                    |             |
| NP 188436   |           | glycosyl hydrolase family 1 protein                   | A. thaliana | 771 |    | 505.2727  | 1008.5308 | 1008.5314 | -0.0005  | 0       | 39   | 0.15    | 1    | R.LIDY.MVK.G                   |             |
| NP 188436   |           | glycosyl hydrolase family 1 protein                   | A. thaliana | 771 |    | 505.2727  | 1008.5308 | 1008.5314 | -0.0005  | 0       | (33) | 0.53    | 1    | R.LIDY.MVK.G                   |             |
| NP 188436   |           | glycosyl hydrolase family 1 protein                   | A. thaliana | 771 |    | 505.2728  | 1008.5310 | 1008.5314 | -0.0003  | 0       | (16) | 29      | 1    | R.LIDY.MVK.G                   |             |
| NP 188436   |           | glycosyl hydrolase family 1 protein                   | A. thaliana | 771 |    | 505.2728  | 1008.5310 | 1008.5314 | -0.0003  | 0       | (22) | 7.2     | 1    | R.LIDY.MVK.G                   |             |
| NP 188436   |           | glycosyl hydrolase family 1 protein                   | A. thaliana | 771 |    | 513.2701  | 1024.5256 | 1024.5263 | -0.0007  | 0       | (24) | 4.1     | 1    | R.LIDY.MVK.G + Oxidation (M)   |             |
| NP 188436   |           | glycosyl hydrolase family 1 protein                   | A. thaliana | 771 |    | 513.2702  | 1024.5258 | 1024.5263 | -0.0005  | 0       | (31) | 0.84    | 2    | R.LIDY.MVK.G + Oxidation (M)   |             |
| NP 188436   |           | glycosyl hydrolase family 1 protein                   | A. thaliana | 771 |    | 513.2702  | 1024.5258 | 1024.5263 | -0.0005  | 0       | (36) | 0.26    | 1    | R.LIDY.MVK.G + Oxidation (M)   |             |
| NP 188436   |           | glycosyl hydrolase family 1 protein                   | A. thaliana | 771 |    | 513.2703  | 1024.5260 | 1024.5263 | 0.0003   | 0       | (33) | 0.51    | 1    | R.LIDY.MVK.G + Oxidation (M)   |             |
| NP 188436   |           | glycosyl hydrolase family 1 protein                   | A. thaliana | 771 |    | 513.2705  | 1024.5264 | 1024.5263 | 0.0001   | 0       | (29) | 1.5     | 1    | R.LIDY.MVK.G + Oxidation (M)   |             |
| NE 188436   |           | glycosyl hydrolase family 1 protein                   | A. thaliana | 771 |    | 513.7717  | 1025.5288 | 1025.5294 | -0.0006  | 1       | (45) | 0.036   | 1    | K.KLNFDAYR.F                   |             |
| NP 188436   |           | glycosyl hydrolase family 1 protein                   | A. thaliana | 771 |    | 513.7717  | 1025.5288 | 1025.5294 | -0.0006  | 1       | (49) | 0.014   | 1    | K.KLNFDAYR.F                   |             |
| NP 188436   |           | glycosyl hydrolase family 1 protein                   | A. thaliana | 771 |    | 513.7717  | 1025.5288 | 1025.5294 | -0.0006  | 1       | 52   | 0.0072  | 1    | K.KLNFDAYR.F                   |             |
| NP 188436   |           | glycosyl hydrolase family 1 protein                   | A. thaliana | 771 |    | 513.7720  | 1025.5294 | 1025.5294 | 0.0000   | 1       | (36) | 0.25    | 1    | K.KLNFDAYR.F                   |             |
| NP 188436   |           | glycosyl hydrolase family 1 protein                   | A. thaliana | 771 |    | 513.7722  | 1025.5298 | 1025.5294 | 0.0004   | 1       | (46) | 0.027   | 1    | K.KLNFDAYR.F                   |             |
| NP 188436   |           | glycosyl hydrolase family 1 protein                   | A. thaliana | 771 |    | 537.2883  | 1072.5620 | 1072.5625 | -0.0004  | 1       | (49) | 0.015   | 1    | R.SKADN.LAAQR.A                |             |
| NP 188436   |           | glycosyl hydrolase family 1 protein                   | A. thaliana | 771 |    | 537.2883  | 1072.5620 | 1072.5625 | -0.0004  | 1       | 79   | 1.8e-05 | 1    | R.SKADN.LAAQR.A                |             |
| NP 188436   |           | glycosyl hydrolase family 1 protein                   | A. thaliana | 771 |    | 537.2883  | 1072.5620 | 1072.5625 | -0.0004  | 1       | (61) | 0.0011  | 1    | R.SKADN.LAAQR.A                |             |
| NP 188436   |           | glycosyl hydrolase family 1 protein                   | A. thaliana | 771 |    | 358.6280  | 1072.5622 | 1072.5625 | -0.0003  | 1       | (35) | 0.43    | 1    | R.SKADN.LAAQR.A                |             |
| NP 188436   |           | glycosyl hydrolase family 1 protein                   | A. thaliana | 771 |    | 537.2884  | 1072.5622 | 1072.5625 | -0.0002  | 1       | (60) | 0.013   | 1    | R.SKADN.LAAQR.A                |             |
| NP 188436   |           | glycosyl hydrolase family 1 protein                   | A. thaliana | 771 |    | 552.2918  | 1102.5690 | 1102.5699 | -0.0009  | 0       | 51   | 0.01    | 1    | R.F.GVYVDYK.T                  |             |
| NP 188436   |           | glycosyl hydrolase family 1 protein                   | A. thaliana | 771 |    | 552.2920  | 1102.5694 | 1102.5699 | -0.0005  | 0       | (51) | 0.011   | 1    | R.F.GVYVDYK.T                  |             |
| NP 188436   |           | glycosyl hydrolase family 1 protein                   | A. thaliana | 771 |    | 552.2921  | 1102.5696 | 1102.5699 | -0.0003  | 0       | (45) | 0.039   | 1    | R.F.GVYVDYK.T                  |             |
| NP 188436   |           | glycosyl hydrolase family 1 protein                   | A. thaliana | 771 |    | 552.2924  | 1102.5702 | 1102.5699 | 0.0003   | 0       | (44) | 0.053   | 1    | R.F.GVYVDYK.T                  |             |
| NP 188436   |           | glycosyl hydrolase family 1 protein                   | A. thaliana | 771 |    | 570.7836  | 1139.5526 | 1139.5532 | -0.0006  | 1       | 42   | 0.066   | 1    | R.YKEDV.DLMK.K                 |             |
| NP 188436   |           | glycosyl hydrolase family 1 protein                   | A. thaliana | 771 |    | 570.7838  | 1139.5530 | 1139.5532 | -0.0002  | 1       | (33) | 0.49    | 1    | R.YKEDV.DLMK.K                 |             |
| NP 188436   |           | glycosyl hydrolase family 1 protein                   | A. thaliana | 771 |    | 570.7838  | 1139.5530 | 1139.5532 | -0.0002  | 1       | (39) | 0.14    | 1    | R.YKEDV.DLMK.K                 |             |
| NP 188436   |           | glycosyl hydrolase family 1 protein                   | A. thaliana | 771 |    | 380.8583  | 1139.5531 | 1139.5532 | -0.0002  | 1       | (21) | 8.3     | 1    | R.YKEDV.DLMK.K                 |             |
| NP 188436   |           | glycosyl hydrolase family 1 protein                   | A. thaliana | 771 |    | 570.7840  | 1139.5534 | 1139.5532 | 0.0002   | 1       | (13) | 50      | 4    | R.YKEDV.DLMK.K                 |             |
| NP 188436   |           | glycosyl hydrolase family 1 protein                   | A. thaliana | 771 |    | 380.8590  | 1139.5552 | 1139.5532 | 0.0019   | 1       | (26) | 2.4     | 1    | R.YKEDV.DLMK.K                 |             |
| NP 188436   |           | glycosyl hydrolase family 1 protein                   | A. thaliana | 771 |    | 578.7809  | 1155.5472 | 1155.5482 | -0.0009  | 1       | (25) | 4.2     | 3    | R.YKEDV.DLMK.K + Oxidation (M) |             |
| NP 188436   |           | glycosyl hydrolase family 1 protein                   | A. thaliana | 771 |    | 578.7809  | 1155.5472 | 1155.5482 | -0.0009  | 1       | (32) | 0.86    | 1    | R.YKEDV.DLMK.K + Oxidation (M) |             |
| NP 188436   |           | glycosyl hydrolase family 1 protein                   | A. thaliana | 771 |    | 578.7811  | 1155.5476 | 1155.5482 | -0.0005  | 1       | (38) | 0.22    | 1    | R.YKEDV.DLMK.K + Oxidation (M) |             |
| NP 188436   |           | glycosyl hydrolase family 1 protein                   | A. thaliana | 771 |    | 578.7811  | 1155.5476 | 1155.5482 | -0.0005  | 1       | (25) | 4       | 3    | R.YKEDV.DLMK.K + Oxidation (M) |             |
| NP 188436   |           | glycosyl hydrolase family 1 protein                   | A. thaliana | 771 |    | 578.7812  | 1155.5478 | 1155.5482 | -0.0003  | 1       | (21) | 9.2     | 1    | R.YKEDV.DLMK.K + Oxidation (M) |             |
| NE 188436   |           | glycosyl hydrolase family 1 protein                   | A. thaliana | 771 |    | 578.7812  | 1155.5478 | 1155.5482 | -0.0003  | 1       | (29) | 1.5     | 2    | R.YKEDV.DLMK.K + Oxidation (M) |             |
| NP 188436   |           | glycosyl hydrolase family 1 protein                   | A. thaliana | 771 |    | 388.1900  | 1155.5482 | 1155.5482 | 0.0000   | 1       | (24) | 5.1     | 3    | R.YKEDV.DLMK.K + Oxidation (M) |             |
| NP 188436   |           | glycosyl hydrolase family 1 protein                   | A. thaliana | 771 |    | 605.7686  | 1209.5226 | 1209.5237 | -0.0010  | 0       | 31   | 0.97    | 1    | K.NWMTFNEPR.V + Oxidation (M)  |             |
| NP 188436   |           | glycosyl hydrolase family 1 protein                   | A. thaliana | 771 |    | 60.8453   | 1319.6760 | 1319.6761 | -0.0001  | 1       | 43   | 0.053   | 1    | K.YKYDYL.NLTK.K                |             |
| NP 188436   |           | glycosyl hydrolase family 1 protein                   | A. thaliana | 771 |    | 714.7923  | 1427.5700 | 1427.5704 | -0.0003  | 0       | 86   | 0.00027 | 1    | K.DFADYAEFCYK.T                |             |
| NP 188436   |           | glycosyl hydrolase family 1 protein                   | A. thaliana | 771 |    | 714.7923  | 1427.5700 | 1427.5704 | -0.0003  | 0       | (63) | 0.0005  | 1    | K.DFADYAEFCYK.T                |             |
| NP 188436   |           | glycosyl hydrolase family 1 protein                   | A. thaliana | 771 |    | 810.4300  | 1618.8454 | 1618.8467 | -0.0013  | 0       | 82   | 0.00056 | 1    | R.VAALGYDNGIFAPGR.C            |             |
| NP 188436   |           | glycosyl hydrolase family 1 protein                   | A. thaliana | 771 |    | 769.0668  | 2304.1786 | 2304.1790 | -0.0004  | 0       | 24   | 2.4     | 1    | K.GITPYANLHYDLP.LLENK.Y        |             |
| NP 188436   |           | glycosyl hydrolase family 1 protein                   | A. thaliana | 771 |    | 1179.0420 | 2356.0694 | 2356.0720 | -0.0026  | 0       | 111  | 4.6e-09 | 1    | K.G.FVFGTAT.SAVQVEGETHQDGR.G   |             |
| NP 188436   |           | glycosyl hydrolase family 1 protein                   | A. thaliana | 771 |    | 786.3641  | 2356.0705 | 2356.0720 | -0.0016  | 0       | (46) | 0.014   | 1    | K.G.FVFGTAT.SAVQVEGETHQDGR.G   |             |
| NP 188436   |           | glycosyl hydrolase family 1 protein                   | A. thaliana | 771 |    | 786.3641  | 2356.0705 | 2356.0720 | -0.0016  | 0       | (42) | 0.036   | 1    | K.G.FVFGTAT.SAVQVEGETHQDGR.G   |             |
| 6 NP 178006 | AT1G78850 | curculin-like (mannose-binding) lectin family protein | A. thaliana | 810 | 17 | 37        | 416.7296  | 831.4446  | 831.4450 | -0.0004 | 0    | (27)    | 3.2  | 1                              | R.VOESTLR.W |
| NP 178006   |           | curculin-like (mannose-binding) lectin family protein | A. thaliana | 810 |    |           | 416.7296  | 831.4446  | 831.4450 | -0.0004 | 0    | 33      | 0.83 | 1                              | R.VOESTLR.W |
| NP 178006   |           | curculin-like (mannose-binding) lectin family protein | A. thaliana | 810 |    |           | 416.7297  | 831.4448  | 831.4450 | -0.0002 | 0    | (24)    | 6.6  | 1                              | R.VOESTLR.W |
| NP 178006   |           | curculin-like (mannose-binding) lectin family protein | A. thaliana | 810 |    |           | 421.7132  | 841.4118  | 841.4123 | -0.0004 | 0    | (19)    | 16   | 3                              | K.TFHYFK.I  |
| NP 178006   |           | curculin-like (mannose-binding) lectin family protein | A. thaliana | 810 |    |           | 421.7132  | 841.4118  | 841.4123 | -0.0004 | 0    | 23      | 6.1  | 2                              | K.TFHYFK.I  |

|           |           |                                                       |                         |             |     |           |           |           |           |           |         |         |      |                                   |   |                             |
|-----------|-----------|-------------------------------------------------------|-------------------------|-------------|-----|-----------|-----------|-----------|-----------|-----------|---------|---------|------|-----------------------------------|---|-----------------------------|
| NP 178006 |           | curculin-like (mannose-binding) lectin family protein | A. thaliana             | 810         |     | 421.7132  | 841.4118  | 841.4123  | -0.0004   | 0         | (22)    | 8.2     | 2    | K.TFHYFK.I                        |   |                             |
| NP 178006 |           | curculin-like (mannose-binding) lectin family protein | A. thaliana             | 810         |     | 421.7132  | 841.4118  | 841.4123  | -0.0004   | 0         | (23)    | 6.6     | 1    | K.TFHYFK.I                        |   |                             |
| NP 178006 |           | curculin-like (mannose-binding) lectin family protein | A. thaliana             | 810         |     | 421.7582  | 841.5018  | 841.4123  | 0.0896    | 0         | (18)    | 17      | 2    | K.TFHYFK.I                        |   |                             |
| NP 178006 |           | curculin-like (mannose-binding) lectin family protein | A. thaliana             | 810         |     | 452.2299  | 902.4452  | 902.4457  | -0.0005   | 0         | (26)    | 3.6     | 2    | R.LESDGNR.V                       |   |                             |
| NP 178006 |           | curculin-like (mannose-binding) lectin family protein | A. thaliana             | 810         |     | 452.2299  | 902.4452  | 902.4457  | -0.0005   | 0         | (42)    | 0.093   | 1    | R.LESDGNR.V                       |   |                             |
| NP 178006 |           | curculin-like (mannose-binding) lectin family protein | A. thaliana             | 810         |     | 452.2300  | 902.4454  | 902.4457  | -0.0003   | 0         | (42)    | 0.092   | 1    | R.LESDGNR.V                       |   |                             |
| NP 178006 |           | curculin-like (mannose-binding) lectin family protein | A. thaliana             | 810         |     | 452.2300  | 902.4454  | 902.4457  | -0.0003   | 0         | (37)    | 0.33    | 1    | R.LESDGNR.V                       |   |                             |
| NP 178006 |           | curculin-like (mannose-binding) lectin family protein | A. thaliana             | 810         |     | 480.7379  | 959.4612  | 959.4613  | -0.0001   | 0         | (20)    | 13      | 1    | R.WVWEANR.G                       |   |                             |
| NP 178006 |           | curculin-like (mannose-binding) lectin family protein | A. thaliana             | 810         |     | 480.7381  | 959.4616  | 959.4613  | 0.0003    | 0         | (17)    | 25      | 4    | R.WVWEANR.G                       |   |                             |
| NP 178006 |           | curculin-like (mannose-binding) lectin family protein | A. thaliana             | 810         |     | 488.2475  | 974.4804  | 974.4822  | -0.0017   | 0         | (12)    | 98      | 4    | K.SPVLDDQFR.V                     |   |                             |
| NP 178006 |           | curculin-like (mannose-binding) lectin family protein | A. thaliana             | 810         |     | 531.2499  | 1060.4852 | 1060.4859 | -0.0007   | 0         | (25)    | 4.2     | 1    | K.SPPLASCDPK.T                    |   |                             |
| NP 178006 |           | curculin-like (mannose-binding) lectin family protein | A. thaliana             | 810         |     | 531.2499  | 1060.4852 | 1060.4859 | -0.0007   | 0         | (32)    | 0.91    | 1    | K.SPPLASCDPK.T                    |   |                             |
| NP 178006 |           | curculin-like (mannose-binding) lectin family protein | A. thaliana             | 810         |     | 531.2499  | 1060.4852 | 1060.4859 | -0.0007   | 0         | (29)    | 1.6     | 1    | K.SPPLASCDPK.T                    |   |                             |
| NP 178006 |           | curculin-like (mannose-binding) lectin family protein | A. thaliana             | 810         |     | 531.2500  | 1060.4854 | 1060.4859 | -0.0005   | 0         | (45)    | 0.042   | 1    | K.SPPLASCDPK.T                    |   |                             |
| NP 178006 |           | curculin-like (mannose-binding) lectin family protein | A. thaliana             | 810         |     | 531.2500  | 1060.4854 | 1060.4859 | -0.0005   | 0         | (45)    | 0.04    | 1    | K.SPPLASCDPK.T                    |   |                             |
| NP 178006 |           | curculin-like (mannose-binding) lectin family protein | A. thaliana             | 810         |     | 531.2500  | 1060.4854 | 1060.4859 | -0.0005   | 0         | (41)    | 0.11    | 1    | K.SPPLASCDPK.T                    |   |                             |
| NP 178006 |           | curculin-like (mannose-binding) lectin family protein | A. thaliana             | 810         |     | 531.2501  | 1060.4856 | 1060.4859 | -0.0003   | 0         | (33)    | 0.64    | 1    | K.SPPLASCDPK.T                    |   |                             |
| NP 178006 |           | curculin-like (mannose-binding) lectin family protein | A. thaliana             | 810         |     | 531.2501  | 1060.4856 | 1060.4859 | -0.0003   | 0         | (39)    | 0.16    | 1    | K.SPPLASCDPK.T                    |   |                             |
| NP 178006 |           | curculin-like (mannose-binding) lectin family protein | A. thaliana             | 810         |     | 538.7524  | 1075.4902 | 1075.4909 | -0.0007   | 0         | (27)    | 2.8     | 1    | K.CLGFVYNR.K                      |   |                             |
| NP 178006 |           | curculin-like (mannose-binding) lectin family protein | A. thaliana             | 810         |     | 549.7601  | 1097.5056 | 1097.5063 | -0.0007   | 0         | (39)    | 0.14    | 1    | K.IEGADSFMTK.Y                    |   |                             |
| NP 178006 |           | curculin-like (mannose-binding) lectin family protein | A. thaliana             | 810         |     | 549.7603  | 1097.5060 | 1097.5063 | -0.0003   | 0         | (39)    | 0.13    | 1    | K.IEGADSFMTK.Y                    |   |                             |
| NP 178006 |           | curculin-like (mannose-binding) lectin family protein | A. thaliana             | 810         |     | 549.7603  | 1097.5060 | 1097.5063 | -0.0003   | 0         | (41)    | 0.09    | 1    | K.IEGADSFMTK.Y                    |   |                             |
| NP 178006 |           | curculin-like (mannose-binding) lectin family protein | A. thaliana             | 810         |     | 557.7573  | 1113.5000 | 1113.5012 | -0.0012   | 0         | (27)    | 2.6     | 1    | K.IEGADSFMTK.Y + Oxidation (M)    |   |                             |
| NP 178006 |           | curculin-like (mannose-binding) lectin family protein | A. thaliana             | 810         |     | 557.7574  | 1113.5002 | 1113.5012 | -0.0010   | 0         | (49)    | 0.015   | 1    | K.IEGADSFMTK.Y + Oxidation (M)    |   |                             |
| NP 178006 |           | curculin-like (mannose-binding) lectin family protein | A. thaliana             | 810         |     | 557.7575  | 1113.5004 | 1113.5012 | -0.0008   | 0         | (45)    | 0.035   | 1    | K.IEGADSFMTK.Y + Oxidation (M)    |   |                             |
| NP 178006 |           | curculin-like (mannose-binding) lectin family protein | A. thaliana             | 810         |     | 557.7576  | 1113.5006 | 1113.5012 | -0.0006   | 0         | (22)    | 7.9     | 1    | K.IEGADSFMTK.Y + Oxidation (M)    |   |                             |
| NP 178006 |           | curculin-like (mannose-binding) lectin family protein | A. thaliana             | 810         |     | 557.7576  | 1113.5006 | 1113.5012 | -0.0006   | 0         | (33)    | 0.61    | 1    | K.IEGADSFMTK.Y + Oxidation (M)    |   |                             |
| NP 178006 |           | curculin-like (mannose-binding) lectin family protein | A. thaliana             | 810         |     | 557.7576  | 1113.5006 | 1113.5012 | -0.0006   | 0         | (49)    | 0.016   | 1    | K.IEGADSFMTK.Y + Oxidation (M)    |   |                             |
| NP 178006 |           | curculin-like (mannose-binding) lectin family protein | A. thaliana             | 810         |     | 557.7577  | 1113.5008 | 1113.5012 | -0.0004   | 0         | (54)    | 0.0043  | 1    | K.IEGADSFMTK.Y + Oxidation (M)    |   |                             |
| NP 178006 |           | curculin-like (mannose-binding) lectin family protein | A. thaliana             | 810         |     | 557.7578  | 1113.5010 | 1113.5012 | -0.0002   | 0         | (45)    | 0.035   | 1    | K.IEGADSFMTK.Y + Oxidation (M)    |   |                             |
| NP 178006 |           | curculin-like (mannose-binding) lectin family protein | A. thaliana             | 810         |     | 557.8102  | 1113.6058 | 1113.6070 | -0.0011   | 0         | (35)    | 0.39    | 1    | K.LVLYYTNK.T                      |   |                             |
| NP 178006 |           | curculin-like (mannose-binding) lectin family protein | A. thaliana             | 810         |     | 557.8104  | 1113.6062 | 1113.6070 | -0.0007   | 0         | (45)    | 0.039   | 1    | K.LVLYYTNK.T                      |   |                             |
| NP 178006 |           | curculin-like (mannose-binding) lectin family protein | A. thaliana             | 810         |     | 570.2997  | 1138.5848 | 1138.5870 | -0.0022   | 0         | (47)    | 0.021   | 1    | R.TGDSSLVAVYK.A                   |   |                             |
| NP 178006 |           | curculin-like (mannose-binding) lectin family protein | A. thaliana             | 810         |     | 570.3004  | 1138.5862 | 1138.5870 | -0.0008   | 0         | (68)    | 0.00017 | 1    | R.TGDSSLVAVYK.A                   |   |                             |
| NP 178006 |           | curculin-like (mannose-binding) lectin family protein | A. thaliana             | 810         |     | 570.3005  | 1138.5864 | 1138.5870 | -0.0006   | 0         | (68)    | 0.00017 | 1    | R.TGDSSLVAVYK.A                   |   |                             |
| NP 178006 |           | curculin-like (mannose-binding) lectin family protein | A. thaliana             | 810         |     | 587.8139  | 1173.6132 | 1173.6142 | -0.0010   | 0         | (47)    | 0.026   | 1    | R.LWQNTANK.G                      |   |                             |
| NP 178006 |           | curculin-like (mannose-binding) lectin family protein | A. thaliana             | 810         |     | 587.8141  | 1173.6136 | 1173.6142 | -0.0006   | 0         | (42)    | 0.077   | 1    | R.LWQNTANK.G                      |   |                             |
| NP 178006 |           | curculin-like (mannose-binding) lectin family protein | A. thaliana             | 810         |     | 587.8143  | 1173.6140 | 1173.6142 | -0.0002   | 0         | (45)    | 0.042   | 1    | R.LWQNTANK.G                      |   |                             |
| NP 178006 |           | curculin-like (mannose-binding) lectin family protein | A. thaliana             | 810         |     | 588.7791  | 1177.5436 | 1177.5438 | 0.0001    | 0         | (27)    | 2.4     | 1    | K.KLGLWQETCK.S                    |   |                             |
| NP 178006 |           | curculin-like (mannose-binding) lectin family protein | A. thaliana             | 810         |     | 621.8575  | 1241.7094 | 1241.7019 | -0.0015   | 1         | (28)    | 2       | 1    | K.KVLYYTNK.T                      |   |                             |
| NP 178006 |           | curculin-like (mannose-binding) lectin family protein | A. thaliana             | 810         |     | 621.8578  | 1241.7010 | 1241.7019 | -0.0009   | 1         | (34)    | 0.5     | 1    | K.KVLYYTNK.T                      |   |                             |
| NP 178006 |           | curculin-like (mannose-binding) lectin family protein | A. thaliana             | 810         |     | 621.8580  | 1241.7014 | 1241.7019 | -0.0005   | 1         | (40)    | 0.13    | 1    | K.KVLYYTNK.T                      |   |                             |
| NP 178006 |           | curculin-like (mannose-binding) lectin family protein | A. thaliana             | 810         |     | 621.8580  | 1241.7014 | 1241.7019 | -0.0005   | 1         | (35)    | 0.41    | 1    | K.KVLYYTNK.T                      |   |                             |
| NP 178006 |           | curculin-like (mannose-binding) lectin family protein | A. thaliana             | 810         |     | 621.8581  | 1241.7016 | 1241.7019 | -0.0003   | 1         | (44)    | 0.055   | 1    | K.KVLYYTNK.T                      |   |                             |
| NP 178006 |           | curculin-like (mannose-binding) lectin family protein | A. thaliana             | 810         |     | 621.8582  | 1241.7018 | 1241.7019 | -0.0001   | 1         | (30)    | 1.2     | 1    | K.KVLYYTNK.T                      |   |                             |
| NP 178006 |           | curculin-like (mannose-binding) lectin family protein | A. thaliana             | 810         |     | 621.8582  | 1241.7018 | 1241.7019 | -0.0001   | 1         | (35)    | 0.45    | 1    | K.KVLYYTNK.T                      |   |                             |
| NP 178006 |           | curculin-like (mannose-binding) lectin family protein | A. thaliana             | 810         |     | 477.5686  | 1429.6840 | 1429.6846 | -0.0007   | 0         | (39)    | 0.13    | 1    | R.IPEHCLGFLGCK.K                  |   |                             |
| NP 178006 |           | curculin-like (mannose-binding) lectin family protein | A. thaliana             | 810         |     | 715.8494  | 1429.6842 | 1429.6846 | -0.0004   | 0         | (60)    | 0.01    | 1    | R.IPEHCLGFLGCK.K                  |   |                             |
| NP 178006 |           | curculin-like (mannose-binding) lectin family protein | A. thaliana             | 810         |     | 715.8494  | 1429.6842 | 1429.6846 | -0.0004   | 0         | (62)    | 0.00073 | 1    | R.IPEHCLGFLGCK.K                  |   |                             |
| NP 178006 |           | curculin-like (mannose-binding) lectin family protein | A. thaliana             | 810         |     | 767.3100  | 1532.6054 | 1532.6049 | 0.0005    | 0         | (84)    | 4.3e-06 | 1    | K.YNGSSTTSCACGDK.C                |   |                             |
| NP 178006 |           | curculin-like (mannose-binding) lectin family protein | A. thaliana             | 810         |     | 828.4001  | 1654.7856 | 1654.7872 | -0.0016   | 0         | (85)    | 2.9e-06 | 1    | K.ILENGNMVYDSSGKF + Oxidation (M) |   |                             |
| NP 178006 |           | curculin-like (mannose-binding) lectin family protein | A. thaliana             | 810         |     | 828.4003  | 1654.7860 | 1654.7872 | -0.0012   | 0         | (73)    | 5e-05   | 1    | K.ILENGNMVYDSSGKF + Oxidation (M) |   |                             |
| NP 178006 |           | curculin-like (mannose-binding) lectin family protein | A. thaliana             | 810         |     | 828.4009  | 1654.7872 | 1654.7872 | 0.0000    | 0         | (85)    | 3e-06   | 1    | K.ILENGNMVYDSSGKF + Oxidation (M) |   |                             |
| NP 178006 |           | curculin-like (mannose-binding) lectin family protein | A. thaliana             | 810         |     | 1144.0270 | 2286.0394 | 2286.0441 | -0.0046   | 0         | (93)    | 2.8e-07 | 1    | R.VVNEGGYDYSPIENPDVR.G            |   |                             |
| NP 178006 |           | curculin-like (mannose-binding) lectin family protein | A. thaliana             | 810         |     | 1144.0280 | 2286.0414 | 2286.0441 | -0.0026   | 0         | (80)    | 5.8e-06 | 1    | R.VVNEGGYDYSPIENPDVR.G            |   |                             |
| NP 178006 |           | curculin-like (mannose-binding) lectin family protein | A. thaliana             | 810         |     | 1144.0290 | 2286.0434 | 2286.0441 | -0.0006   | 0         | (61)    | 0.0043  | 1    | R.VVNEGGYDYSPIENPDVR.G            |   |                             |
| NP 178006 |           | curculin-like (mannose-binding) lectin family protein | A. thaliana             | 810         |     | 1144.0290 | 2286.0434 | 2286.0441 | -0.0006   | 0         | (98)    | 9.4e-08 | 1    | R.VVNEGGYDYSPIENPDVR.G            |   |                             |
| 6         | NP 564120 | AT1G20620                                             | CAT3 catalase           | A. thaliana | 217 | 6         | 10        | 384.7215  | 767.4284  | 767.4290  | -0.0005 | 0       | 36   | 0.24                              | 1 | R.LTHEIR.V                  |
|           | NP 564120 |                                                       | CAT3 catalase           | A. thaliana | 217 |           |           | 400.2248  | 798.4350  | 798.4348  | 0.0003  | 1       | 24   | 5.3                               | 6 | R.ERIPER.V                  |
|           | NP 564120 |                                                       | CAT3 catalase           | A. thaliana | 217 |           |           | 460.2223  | 918.4300  | 918.4294  | 0.0006  | 0       | 21   | 15                                | 1 | K.NLTDDEAK.V                |
|           | NP 564120 |                                                       | CAT3 catalase           | A. thaliana | 217 |           |           | 487.7562  | 973.4978  | 973.4981  | -0.0003 | 0       | 22   | 8.4                               | 1 | R.FSTVHHER.A                |
|           | NP 564120 |                                                       | CAT3 catalase           | A. thaliana | 217 |           |           | 568.8433  | 1135.6720 | 1135.6714 | 0.0007  | 0       | 55   | 0.0042                            | 1 | R.APGQVTPVWR.F              |
|           | NP 564120 |                                                       | CAT3 catalase           | A. thaliana | 217 |           |           | 653.3431  | 1304.6716 | 1304.6725 | -0.0008 | 0       | 60   | 0.0011                            | 1 | K.VYPTPTNYSIGR.T            |
| 7         | CAA67157  | AT1G70710                                             | endo-1,4-beta-glucanase | A. thaliana | 635 | 13        | 28        | 358.2299  | 714.4272  | 714.4276  | -0.0003 | 0       | 30   | 1.7                               | 4 | K.NEHLK.A                   |
|           | CAA67157  |                                                       | endo-1,4-beta-glucanase | A. thaliana | 635 |           |           | 363.2003  | 724.3860  | 724.3868  | -0.0007 | 0       | (12) | 61                                | 4 | K.LPPDQRL                   |
|           | CAA67157  |                                                       | endo-1,4-beta-glucanase | A. thaliana | 635 |           |           | 363.2826  | 724.5506  | 724.3868  | 0.1639  | 0       | 19   | 13                                | 1 | K.LPPDQRL                   |
|           | CAA67157  |                                                       | endo-1,4-beta-glucanase | A. thaliana | 635 |           |           | 402.2074  | 802.4002  | 802.4007  | -0.0005 | 0       | (28) | 2.8                               | 2 | K.TMGPELR.N                 |
|           | CAA67157  |                                                       | endo-1,4-beta-glucanase | A. thaliana | 635 |           |           | 402.2075  | 802.4004  | 802.4007  | -0.0003 | 0       | (28) | 2.9                               | 1 | K.TMGPELR.N                 |
|           | CAA67157  |                                                       | endo-1,4-beta-glucanase | A. thaliana | 635 |           |           | 402.2075  | 802.4004  | 802.4007  | -0.0003 | 0       | (27) | 3.4                               | 1 | K.TMGPELR.N                 |
|           | CAA67157  |                                                       | endo-1,4-beta-glucanase | A. thaliana | 635 |           |           | 410.2048  | 818.3950  | 818.3956  | -0.0006 | 0       | (31) | 1.4                               | 3 | K.TMGPELR.N + Oxidation (M) |
|           | CAA67157  |                                                       | endo-1,4-beta-glucanase | A. thaliana | 635 |           |           | 410.2049  | 818.3952  | 818.3956  | -0.0004 | 0       | (24) | 6.9                               | 3 | K.TMGPELR.N + Oxidation (M) |
|           | CAA67157  |                                                       | endo-1,4-beta-glucanase | A. thaliana | 635 |           |           | 410.2049  | 818.3952  | 818.3956  | -0.0004 | 0       | (31) | 1.3                               | 3 | K.TMGPELR.N + Oxidation (M) |
|           | CAA67157  |                                                       | endo-1,4-beta-glucanase | A. thaliana | 635 |           |           | 410.2050  | 818.3954  | 818.3956  | -0.0002 | 0       | (31) | 1.3                               | 3 | K.TMGPELR.N + Oxidation (M) |
|           | CAA67157  |                                                       | endo-1,4-beta-glucanase | A. thaliana | 635 |           |           | 410.2050  | 818.3954  | 818.3956  | -0.0002 | 0       | (27) | 3.4                               | 3 | K.TMGPELR.N + Oxidation (M) |
|           | CAA67157  |                                                       | endo-1,4-beta-glucanase | A. thaliana | 635 |           |           | 412.7241  | 823.4336  | 823.4341  | -0.0004 | 0       | (35) | 0.33                              | 1 | R.VFAFANR.Y                 |
|           | CAA67157  |                                                       | endo-1,4-beta-glucanase | A. thaliana | 635 |           |           | 412.7241  | 823.4336  | 823.4341  | -0.0004 | 0       | (37) | 0.21                              | 1 | R.VFAFANR.Y                 |
|           | CAA67157  |                                                       | endo-1,4-beta-glucanase | A. thaliana | 635 |           |           | 412.7241  | 823.4336  | 823.4341  | -0.0004 | 0       | (46) | 0.026                             | 1 | R.VFAFANR.Y                 |
|           | CAA67157  |                                                       | endo-1,4-beta-glucanase | A. thaliana | 635 |           |           | 412.7242  | 823.4338  | 823.4341  | -0.0002 | 0       | (29) | 1.5                               | 2 | R.VFAFANR.Y                 |
|           | CAA67157  |                                                       | endo-1,4-beta-glucanase | A. thaliana | 635 |           |           | 412.7242  | 823.4338  | 823.4341  | -0.0002 | 0       | (43) | 0.052                             | 1 | R.VFAFANR.Y                 |
|           | CAA67157  |                                                       | endo-1,4-beta-glucanase | A. thaliana | 635 |           |           | 447.7555  | 893.4964  | 893.4971  | -0.0006 | 1       | 22   | 7.2                               | 2 | R.TVYKIDR.A                 |
|           |           |                                                       |                         |             |     |           |           |           |           |           |         |         |      |                                   |   |                             |

|           |           |                                         |                                         |             |     |           |           |           |          |          |         |         |      |                               |   |            |
|-----------|-----------|-----------------------------------------|-----------------------------------------|-------------|-----|-----------|-----------|-----------|----------|----------|---------|---------|------|-------------------------------|---|------------|
| CAA67157  |           | endo-1,4-beta-glucanase                 | A. thaliana                             | 635         |     | 447.7558  | 893.4970  | 893.4971  | -0.0000  | 1        | (10)    | 1.2e+02 | 6    | R.TVYKIDR.A                   |   |            |
| CAA67157  |           | endo-1,4-beta-glucanase                 | A. thaliana                             | 635         |     | 499.2748  | 996.5350  | 996.5352  | -0.0002  | 1        | 22      | 7.2     | 1    | R.SGKLPDQRL                   |   |            |
| CAA67157  |           | endo-1,4-beta-glucanase                 | A. thaliana                             | 635         |     | 510.7369  | 1019.4592 | 1019.4600 | -0.0007  | 0        | 28      | 2.2     | 1    | K.AEYFESFK.Q                  |   |            |
| CAA67157  |           | endo-1,4-beta-glucanase                 | A. thaliana                             | 635         |     | 510.7370  | 1019.4594 | 1019.4600 | -0.0005  | 0        | (14)    | 55      | 2    | K.AEYFESFK.Q                  |   |            |
| CAA67157  |           | endo-1,4-beta-glucanase                 | A. thaliana                             | 635         |     | 510.7372  | 1019.4598 | 1019.4600 | -0.0001  | 0        | (24)    | 5.8     | 2    | K.AEYFESFK.Q                  |   |            |
| CAA67157  |           | endo-1,4-beta-glucanase                 | A. thaliana                             | 635         |     | 526.3159  | 1050.6172 | 1050.6186 | -0.0013  | 0        | 48      | 0.019   | 1    | K.HAGNVLSK.E                  |   |            |
| CAA67157  |           | endo-1,4-beta-glucanase                 | A. thaliana                             | 635         |     | 526.3163  | 1050.6180 | 1050.6186 | -0.0005  | 0        | (33)    | 0.54    | 1    | K.HAGNVLSK.E                  |   |            |
| CAA67157  |           | endo-1,4-beta-glucanase                 | A. thaliana                             | 635         |     | 526.3163  | 1050.6180 | 1050.6186 | -0.0005  | 0        | (37)    | 0.24    | 1    | K.HAGNVLSK.E                  |   |            |
| CAA67157  |           | endo-1,4-beta-glucanase                 | A. thaliana                             | 635         |     | 526.3163  | 1050.6180 | 1050.6186 | -0.0005  | 0        | (40)    | 0.12    | 1    | K.HAGNVLSK.E                  |   |            |
| CAA67157  |           | endo-1,4-beta-glucanase                 | A. thaliana                             | 635         |     | 612.8400  | 1223.6654 | 1223.6662 | -0.0008  | 1        | 59      | 0.0014  | 1    | R.KSILFFEGQR.S                |   |            |
| CAA67157  |           | endo-1,4-beta-glucanase                 | A. thaliana                             | 635         |     | 612.8404  | 1223.6662 | 1223.6662 | 0.0000   | 1        | (53)    | 0.0049  | 1    | R.KSILFFEGQR.S                |   |            |
| CAA67157  |           | endo-1,4-beta-glucanase                 | A. thaliana                             | 635         |     | 799.9320  | 1597.8494 | 1597.8498 | -0.0003  | 0        | 67      | 0.00018 | 1    | K.VPFGELTASPSSLR.Q            |   |            |
| CAA67157  |           | endo-1,4-beta-glucanase                 | A. thaliana                             | 635         |     | 853.9169  | 1705.8192 | 1705.8206 | -0.0014  | 0        | (63)    | 0.00046 | 1    | R.GSSVPSVAHPSHGCK.E           |   |            |
| CAA67157  |           | endo-1,4-beta-glucanase                 | A. thaliana                             | 635         |     | 589.6138  | 1705.8198 | 1705.8206 | -0.0010  | 0        | (15)    | 30      | 4    | R.GSSVPSVAHPSHGCK.E           |   |            |
| CAA67157  |           | endo-1,4-beta-glucanase                 | A. thaliana                             | 635         |     | 589.6138  | 1705.8198 | 1705.8206 | -0.0010  | 0        | (22)    | 8.5     | 1    | R.GSSVPSVAHPSHGCK.E           |   |            |
| CAA67157  |           | endo-1,4-beta-glucanase                 | A. thaliana                             | 635         |     | 853.9172  | 1705.8198 | 1705.8206 | -0.0008  | 0        | (48)    | 0.013   | 1    | R.GSSVPSVAHPSHGCK.E           |   |            |
| CAA67157  |           | endo-1,4-beta-glucanase                 | A. thaliana                             | 635         |     | 589.6140  | 1705.8202 | 1705.8206 | -0.0004  | 0        | (21)    | 7       | 1    | R.GSSVPSVAHPSHGCK.E           |   |            |
| CAA67157  |           | endo-1,4-beta-glucanase                 | A. thaliana                             | 635         |     | 589.6140  | 1705.8202 | 1705.8206 | -0.0004  | 0        | (26)    | 2.2     | 1    | R.GSSVPSVAHPSHGCK.E           |   |            |
| CAA67157  |           | endo-1,4-beta-glucanase                 | A. thaliana                             | 635         |     | 589.6141  | 1705.8205 | 1705.8206 | -0.0001  | 0        | (20)    | 8.6     | 1    | R.GSSVPSVAHPSHGCK.E           |   |            |
| CAA67157  |           | endo-1,4-beta-glucanase                 | A. thaliana                             | 635         |     | 853.9177  | 1705.8208 | 1705.8206 | 0.0002   | 0        | 67      | 0.00017 | 1    | R.GSSVPSVAHPSHGCK.E           |   |            |
| CAA67157  |           | endo-1,4-beta-glucanase                 | A. thaliana                             | 635         |     | 1030.9560 | 2059.8974 | 2059.8971 | 0.0004   | 0        | 88      | 1.3e-06 | 1    | R.DGSSAGVDLGGYYDAGDNK.F       |   |            |
| CAA67157  |           | endo-1,4-beta-glucanase                 | A. thaliana                             | 635         |     | 1030.9560 | 2059.8974 | 2059.8971 | 0.0004   | 0        | (69)    | 9.4e-05 | 1    | R.DGSSAGVDLGGYYDAGDNK.F       |   |            |
| CAA67157  |           | endo-1,4-beta-glucanase                 | A. thaliana                             | 635         |     | 1030.9560 | 2059.8974 | 2059.8971 | 0.0004   | 0        | (76)    | 2.3e-05 | 1    | R.DGSSAGVDLGGYYDAGDNK.F       |   |            |
| CAA67157  |           | endo-1,4-beta-glucanase                 | A. thaliana                             | 635         |     | 728.0461  | 2181.1165 | 2181.1178 | -0.0013  | 0        | (30)    | 0.58    | 1    | R.AHPGSDVAGETAALAASIVFR.K     |   |            |
| CAA67157  |           | endo-1,4-beta-glucanase                 | A. thaliana                             | 635         |     | 728.0462  | 2181.1168 | 2181.1178 | -0.0010  | 0        | (38)    | 0.1     | 1    | R.AHPGSDVAGETAALAASIVFR.K     |   |            |
| CAA67157  |           | endo-1,4-beta-glucanase                 | A. thaliana                             | 635         |     | 1091.5670 | 2181.1194 | 2181.1178 | 0.0016   | 0        | 108     | 1e-08   | 1    | R.AHPGSDVAGETAALAASIVFR.K     |   |            |
| 8         | NP_177294 | AT1G71380                               | ATCELS/ATGH9B3 (Glycosyl Hydrolase 9B3) | A. thaliana | 916 | 17        | 34        | 313.6845  | 625.3544 | 625.3548 | -0.0003 | 0       | (44) | 0.037                         | 1 | R.SGPLPR.G |
| NP_177294 |           | ATCELS/ATGH9B3 (Glycosyl Hydrolase 9B3) | A. thaliana                             | 916         |     | 313.6845  | 625.3544  | 625.3548  | -0.0003  | 0        | (47)    | 0.017   | 1    | R.SGPLPR.G                    |   |            |
| NP_177294 |           | ATCELS/ATGH9B3 (Glycosyl Hydrolase 9B3) | A. thaliana                             | 916         |     | 313.6845  | 625.3544  | 625.3548  | -0.0003  | 0        | (37)    | 0.19    | 1    | R.SGPLPR.G                    |   |            |
| NP_177294 |           | ATCELS/ATGH9B3 (Glycosyl Hydrolase 9B3) | A. thaliana                             | 916         |     | 313.6845  | 625.3544  | 625.3548  | -0.0003  | 0        | (44)    | 0.037   | 1    | R.SGPLPR.G                    |   |            |
| NP_177294 |           | ATCELS/ATGH9B3 (Glycosyl Hydrolase 9B3) | A. thaliana                             | 916         |     | 313.6845  | 625.3544  | 625.3548  | -0.0003  | 0        | (44)    | 0.032   | 1    | R.SGPLPR.G                    |   |            |
| NP_177294 |           | ATCELS/ATGH9B3 (Glycosyl Hydrolase 9B3) | A. thaliana                             | 916         |     | 313.6845  | 625.3544  | 625.3548  | -0.0003  | 0        | (47)    | 0.019   | 1    | R.SGPLPR.G                    |   |            |
| NP_177294 |           | ATCELS/ATGH9B3 (Glycosyl Hydrolase 9B3) | A. thaliana                             | 916         |     | 313.6845  | 625.3544  | 625.3548  | -0.0003  | 0        | (47)    | 0.016   | 1    | R.SGPLPR.G                    |   |            |
| NP_177294 |           | ATCELS/ATGH9B3 (Glycosyl Hydrolase 9B3) | A. thaliana                             | 916         |     | 313.6845  | 625.3544  | 625.3548  | -0.0003  | 0        | (42)    | 0.049   | 1    | R.SGPLPR.G                    |   |            |
| NP_177294 |           | ATCELS/ATGH9B3 (Glycosyl Hydrolase 9B3) | A. thaliana                             | 916         |     | 313.6845  | 625.3544  | 625.3548  | -0.0003  | 0        | (39)    | 0.099   | 1    | R.SGPLPR.G                    |   |            |
| NP_177294 |           | ATCELS/ATGH9B3 (Glycosyl Hydrolase 9B3) | A. thaliana                             | 916         |     | 313.6845  | 625.3544  | 625.3548  | -0.0003  | 0        | (45)    | 0.029   | 1    | R.SGPLPR.G                    |   |            |
| NP_177294 |           | ATCELS/ATGH9B3 (Glycosyl Hydrolase 9B3) | A. thaliana                             | 916         |     | 313.6845  | 625.3544  | 625.3548  | -0.0003  | 0        | (47)    | 0.018   | 1    | R.SGPLPR.G                    |   |            |
| NP_177294 |           | ATCELS/ATGH9B3 (Glycosyl Hydrolase 9B3) | A. thaliana                             | 916         |     | 313.6845  | 625.3544  | 625.3548  | -0.0003  | 0        | 49      | 0.011   | 1    | R.SGPLPR.G                    |   |            |
| NP_177294 |           | ATCELS/ATGH9B3 (Glycosyl Hydrolase 9B3) | A. thaliana                             | 916         |     | 313.6845  | 625.3544  | 625.3548  | -0.0003  | 0        | (38)    | 0.13    | 1    | R.SGPLPR.G                    |   |            |
| NP_177294 |           | ATCELS/ATGH9B3 (Glycosyl Hydrolase 9B3) | A. thaliana                             | 916         |     | 313.6845  | 625.3544  | 625.3548  | -0.0003  | 0        | (38)    | 0.13    | 1    | R.SGPLPR.G                    |   |            |
| NP_177294 |           | ATCELS/ATGH9B3 (Glycosyl Hydrolase 9B3) | A. thaliana                             | 916         |     | 313.6845  | 625.3544  | 625.3548  | -0.0003  | 0        | (47)    | 0.018   | 1    | R.SGPLPR.G                    |   |            |
| NP_177294 |           | ATCELS/ATGH9B3 (Glycosyl Hydrolase 9B3) | A. thaliana                             | 916         |     | 313.6845  | 625.3544  | 625.3548  | -0.0003  | 0        | (44)    | 0.036   | 1    | R.SGPLPR.G                    |   |            |
| NP_177294 |           | ATCELS/ATGH9B3 (Glycosyl Hydrolase 9B3) | A. thaliana                             | 916         |     | 313.6846  | 625.3546  | 625.3548  | -0.0001  | 0        | (40)    | 0.091   | 1    | R.SGPLPR.G                    |   |            |
| NP_177294 |           | ATCELS/ATGH9B3 (Glycosyl Hydrolase 9B3) | A. thaliana                             | 916         |     | 313.6846  | 625.3546  | 625.3548  | -0.0001  | 0        | (47)    | 0.018   | 1    | R.SGPLPR.G                    |   |            |
| NP_177294 |           | ATCELS/ATGH9B3 (Glycosyl Hydrolase 9B3) | A. thaliana                             | 916         |     | 313.6846  | 625.3546  | 625.3548  | -0.0001  | 0        | (47)    | 0.018   | 1    | R.SGPLPR.G                    |   |            |
| NP_177294 |           | ATCELS/ATGH9B3 (Glycosyl Hydrolase 9B3) | A. thaliana                             | 916         |     | 313.6846  | 625.3546  | 625.3548  | -0.0001  | 0        | (47)    | 0.018   | 1    | R.SGPLPR.G                    |   |            |
| NP_177294 |           | ATCELS/ATGH9B3 (Glycosyl Hydrolase 9B3) | A. thaliana                             | 916         |     | 313.6846  | 625.3546  | 625.3548  | -0.0001  | 0        | (39)    | 0.099   | 1    | R.SGPLPR.G                    |   |            |
| NP_177294 |           | ATCELS/ATGH9B3 (Glycosyl Hydrolase 9B3) | A. thaliana                             | 916         |     | 313.6846  | 625.3546  | 625.3548  | -0.0001  | 0        | (47)    | 0.018   | 1    | R.SGPLPR.G                    |   |            |
| NP_177294 |           | ATCELS/ATGH9B3 (Glycosyl Hydrolase 9B3) | A. thaliana                             | 916         |     | 313.6846  | 625.3546  | 625.3548  | -0.0001  | 0        | (47)    | 0.018   | 1    | R.SGPLPR.G                    |   |            |
| NP_177294 |           | ATCELS/ATGH9B3 (Glycosyl Hydrolase 9B3) | A. thaliana                             | 916         |     | 313.6846  | 625.3546  | 625.3548  | -0.0001  | 0        | (47)    | 0.018   | 1    | R.SGPLPR.G                    |   |            |
| NP_177294 |           | ATCELS/ATGH9B3 (Glycosyl Hydrolase 9B3) | A. thaliana                             | 916         |     | 365.2444  | 728.4742  | 728.4796  | -0.0054  | 0        | (27)    | 3.3     | 1    | R.LLLATK.D                    |   |            |
| NP_177294 |           | ATCELS/ATGH9B3 (Glycosyl Hydrolase 9B3) | A. thaliana                             | 916         |     | 365.2469  | 728.4792  | 728.4796  | -0.0004  | 0        | 37      | 0.33    | 1    | R.LLLATK.D                    |   |            |
| NP_177294 |           | ATCELS/ATGH9B3 (Glycosyl Hydrolase 9B3) | A. thaliana                             | 916         |     | 437.7295  | 873.4444  | 873.4457  | -0.0012  | 0        | 29      | 2.1     | 1    | R.GQOISWR.A                   |   |            |
| NP_177294 |           | ATCELS/ATGH9B3 (Glycosyl Hydrolase 9B3) | A. thaliana                             | 916         |     | 505.2709  | 1008.5272 | 1008.5280 | -0.0008  | 0        | (32)    | 0.7     | 1    | R.WATDYLLK.C                  |   |            |
| NP_177294 |           | ATCELS/ATGH9B3 (Glycosyl Hydrolase 9B3) | A. thaliana                             | 916         |     | 505.2712  | 1008.5278 | 1008.5280 | -0.0002  | 0        | 33      | 0.53    | 1    | R.WATDYLLK.C                  |   |            |
| NP_177294 |           | ATCELS/ATGH9B3 (Glycosyl Hydrolase 9B3) | A. thaliana                             | 916         |     | 505.2714  | 1008.5282 | 1008.5280 | 0.0002   | 0        | (31)    | 0.96    | 1    | R.WATDYLLK.C                  |   |            |
| NP_177294 |           | ATCELS/ATGH9B3 (Glycosyl Hydrolase 9B3) | A. thaliana                             | 916         |     | 508.7447  | 1015.4748 | 1015.4756 | -0.0008  | 0        | (66)    | 0.0034  | 1    | R.MGPELENAR.V                 |   |            |
| NP_177294 |           | ATCELS/ATGH9B3 (Glycosyl Hydrolase 9B3) | A. thaliana                             | 916         |     | 508.7449  | 1015.4752 | 1015.4756 | -0.0004  | 0        | 59      | 0.0016  | 1    | R.MGPELENAR.V                 |   |            |
| NP_177294 |           | ATCELS/ATGH9B3 (Glycosyl Hydrolase 9B3) | A. thaliana                             | 916         |     | 508.7449  | 1015.4752 | 1015.4756 | -0.0004  | 0        | (65)    | 0.0047  | 1    | R.MGPELENAR.V                 |   |            |
| NP_177294 |           | ATCELS/ATGH9B3 (Glycosyl Hydrolase 9B3) | A. thaliana                             | 916         |     | 508.7449  | 1015.4752 | 1015.4756 | -0.0004  | 0        | (68)    | 0.0023  | 1    | R.MGPELENAR.V                 |   |            |
| NP_177294 |           | ATCELS/ATGH9B3 (Glycosyl Hydrolase 9B3) | A. thaliana                             | 916         |     | 508.7450  | 1015.4754 | 1015.4756 | -0.0002  | 0        | (64)    | 0.0059  | 1    | R.MGPELENAR.V                 |   |            |
| NP_177294 |           | ATCELS/ATGH9B3 (Glycosyl Hydrolase 9B3) | A. thaliana                             | 916         |     | 515.7270  | 1029.4394 | 1029.4403 | -0.0009  | 0        | (37)    | 0.28    | 1    | K.DSNFEQYK.Q                  |   |            |
| NP_177294 |           | ATCELS/ATGH9B3 (Glycosyl Hydrolase 9B3) | A. thaliana                             | 916         |     | 515.7272  | 1029.4398 | 1029.4403 | -0.0005  | 0        | (41)    | 0.11    | 1    | K.DSNFEQYK.Q                  |   |            |
| NP_177294 |           | ATCELS/ATGH9B3 (Glycosyl Hydrolase 9B3) | A. thaliana                             | 916         |     | 515.7272  | 1029.4398 | 1029.4403 | -0.0005  | 0        | 44      | 0.052   | 1    | K.DSNFEQYK.Q                  |   |            |
| NP_177294 |           | ATCELS/ATGH9B3 (Glycosyl Hydrolase 9B3) | A. thaliana                             | 916         |     | 516.7421  | 1031.4696 | 1031.4706 | -0.0009  | 0        | (49)    | 0.019   | 1    | R.MGPELENAR.V + Oxidation (M) |   |            |
| NP_177294 |           | ATCELS/ATGH9B3 (Glycosyl Hydrolase 9B3) | A. thaliana                             | 916         |     | 516.7421  | 1031.4696 | 1031.4706 | -0.0009  | 0        | (51)    | 0.011   | 1    | R.MGPELENAR.V + Oxidation (M) |   |            |
| NP_177294 |           | ATCELS/ATGH9B3 (Glycosyl Hydrolase 9B3) | A. thaliana                             | 916         |     | 516.7423  | 1031.4700 | 1031.4706 | -0.0005  | 0        | (53)    | 0.0073  | 1    | R.MGPELENAR.V + Oxidation (M) |   |            |
| NP_177294 |           | ATCELS/ATGH9B3 (Glycosyl Hydrolase 9B3) | A. thaliana                             | 916         |     | 516.7424  | 1031.4702 | 1031.4706 | -0.0003  | 0        | (42)    | 0.09    | 1    | R.MGPELENAR.V + Oxidation (M) |   |            |
| NP_177294 |           | ATCELS/ATGH9B3 (Glycosyl Hydrolase 9B3) | A. thaliana                             | 916         |     | 516.7426  | 1031.4706 | 1031.4706 | 0.0001   | 0        | (46)    | 0.031   | 1    | R.MGPELENAR.V + Oxidation (M) |   |            |
| NP_177294 |           | ATCELS/ATGH9B3 (Glycosyl Hydrolase 9B3) | A. thaliana                             | 916         |     | 346.8604  | 1037.5594 | 1037.5618 | -0.0024  | 0        | (25)    | 3.2     | 1    | R.ASSPISHALR.S                |   |            |
| NP_177294 |           | ATCELS/ATGH9B3 (Glycosyl Hydrolase 9B3) | A. thaliana                             | 916         |     | 519.7875  | 1037.5604 | 1037.5618 | -0.0013  | 0        | 82      | 0.00064 | 1    | R.ASSPISHALR.S                |   |            |
| NP_177294 |           | ATCELS/ATGH9B3 (Glycosyl Hydrolase 9B3) | A. thaliana                             | 916         |     | 346.8608  | 1037.5606 | 1037.5618 | -0.0012  | 0        | (13)    | 50      | 3    | R.ASSPISHALR.S                |   |            |
| NP_177294 |           | ATCELS/ATGH9B3 (Glycosyl Hydrolase 9B3) | A. thaliana                             | 916         |     | 346.8608  | 1037.5606 | 1037.5618 | -0.0012  | 0        | (27)    | 2.3     | 1    | R.ASSPISHALR.S                |   |            |
| NP_177294 |           | ATCELS/ATGH9B3 (Glycosyl Hydrolase 9B3) | A. thaliana                             | 916         |     | 519.7876  | 1037.5606 | 1037.5618 | -0.0011  | 0        | (49)    | 0.014   | 1    | R.ASSPISHALR.S                |   |            |
| NP_177294 |           | ATCELS/ATGH9B3 (Glycosyl Hydrolase 9B3) | A. thaliana                             | 916         |     | 519.7876  | 1037.5606 | 1037.5618 | -0.0011  | 0        | (42)    | 0.073   | 1    | R.ASSPISHALR.S                |   |            |
| NP_177294 |           | ATCELS/ATGH9B3 (Glycosyl Hydrolase 9B3) | A. thaliana                             | 916         |     | 346.8609  | 1037.5609 | 1037.5618 | -0.0009  | 0        | (22)    | 6.6     | 1    | R.ASSPISHALR.S                |   |            |
| NP_177294 |           | ATCELS/ATGH9B3 (Glycosyl Hydrolase 9B3) | A. thaliana                             | 916         |     | 519.7878  | 1037.5610 | 1037.5618 | -0.0007  | 0        | (37)    | 0.24    | 3    | R.ASSPISHALR.S                |   |            |
| NP_177294 |           | ATCELS/ATGH9B3 (Glycosyl Hydrolase 9B3) | A. thaliana                             | 916         |     | 519.7878  | 1037.5610 | 1037.5618 | -0.0007  | 0        | (62)    | 0.0065  | 1    | R.ASSPISHALR.S                |   |            |
| NP_177294 |           | ATCELS/ATGH9B3 (Glycosyl Hydrolase 9B3) | A. thaliana                             | 916         |     | 519.7878  | 103       |           |          |          |         |         |      |                               |   |            |

|           |           |                                          |                               |             |     |    |           |           |           |          |         |       |         |    |                                         |            |
|-----------|-----------|------------------------------------------|-------------------------------|-------------|-----|----|-----------|-----------|-----------|----------|---------|-------|---------|----|-----------------------------------------|------------|
| NP 177294 |           | ATCEL3/ATGH9B3 ( Glycosyl Hydrolase 9B3) | A. thaliana                   | 916         |     |    | 346.8611  | 1037.5615 | 1037.5618 | -0.0003  | 0       | (27)  | 2.1     | 1  | R.ASSLFPHALR.S                          |            |
| NP 177294 |           | ATCEL3/ATGH9B3 ( Glycosyl Hydrolase 9B3) | A. thaliana                   | 916         |     |    | 519.7885  | 1037.5624 | 1037.5618 | 0.0007   | 0       | (36)  | 0.26    | 1  | R.ASSLFPHALR.S                          |            |
| NP 177294 |           | ATCEL3/ATGH9B3 ( Glycosyl Hydrolase 9B3) | A. thaliana                   | 916         |     |    | 548.3008  | 1094.5870 | 1094.5873 | -0.0002  | 0       | 46    | 0.026   | 1  | K.SLLFFQGR.S                            |            |
| NP 177294 |           | ATCEL3/ATGH9B3 ( Glycosyl Hydrolase 9B3) | A. thaliana                   | 916         |     |    | 556.8082  | 1111.6018 | 1111.6026 | -0.0007  | 0       | (71)  | 8.4e-05 | 1  | K.YAGAYLLSR.R                           |            |
| NP 177294 |           | ATCEL3/ATGH9B3 ( Glycosyl Hydrolase 9B3) | A. thaliana                   | 916         |     |    | 556.8082  | 1111.6018 | 1111.6026 | -0.0007  | 0       | (67)  | 0.0021  | 1  | K.YAGAYLLSR.R                           |            |
| NP 177294 |           | ATCEL3/ATGH9B3 ( Glycosyl Hydrolase 9B3) | A. thaliana                   | 916         |     |    | 556.8086  | 1111.6026 | 1111.6026 | 0.0001   | 0       | (68)  | 0.00018 | 1  | K.YAGAYLLSR.R                           |            |
| NP 177294 |           | ATCEL3/ATGH9B3 ( Glycosyl Hydrolase 9B3) | A. thaliana                   | 916         |     |    | 556.8086  | 1111.6026 | 1111.6026 | 0.0001   | 0       | 75    | 3.5e-05 | 1  | K.YAGAYLLSR.R                           |            |
| NP 177294 |           | ATCEL3/ATGH9B3 ( Glycosyl Hydrolase 9B3) | A. thaliana                   | 916         |     |    | 586.7955  | 1171.5764 | 1171.5768 | -0.0003  | 1       | (33)  | 0.54    | 1  | K.RMGPELENAR.V                          |            |
| NP 177294 |           | ATCEL3/ATGH9B3 ( Glycosyl Hydrolase 9B3) | A. thaliana                   | 916         |     |    | 396.8643  | 1187.5711 | 1187.5717 | -0.0006  | 1       | (39)  | 0.16    | 1  | K.RMGPELENAR.V + Oxidation (M)          |            |
| NP 177294 |           | ATCEL3/ATGH9B3 ( Glycosyl Hydrolase 9B3) | A. thaliana                   | 916         |     |    | 594.7929  | 1187.5712 | 1187.5717 | -0.0004  | 1       | (15)  | 39      | 1  | K.RMGPELENAR.V + Oxidation (M)          |            |
| NP 177294 |           | ATCEL3/ATGH9B3 ( Glycosyl Hydrolase 9B3) | A. thaliana                   | 916         |     |    | 396.8644  | 1187.5714 | 1187.5717 | -0.0003  | 1       | 39    | 0.15    | 1  | K.RMGPELENAR.V + Oxidation (M)          |            |
| NP 177294 |           | ATCEL3/ATGH9B3 ( Glycosyl Hydrolase 9B3) | A. thaliana                   | 916         |     |    | 594.7930  | 1187.5714 | 1187.5717 | -0.0002  | 1       | (23)  | 5.9     | 1  | K.RMGPELENAR.V + Oxidation (M)          |            |
| NP 177294 |           | ATCEL3/ATGH9B3 ( Glycosyl Hydrolase 9B3) | A. thaliana                   | 916         |     |    | 594.7931  | 1187.5716 | 1187.5717 | -0.0000  | 1       | (34)  | 0.5     | 1  | K.RMGPELENAR.V + Oxidation (M)          |            |
| NP 177294 |           | ATCEL3/ATGH9B3 ( Glycosyl Hydrolase 9B3) | A. thaliana                   | 916         |     |    | 396.8645  | 1187.5717 | 1187.5717 | 0.0000   | 1       | (34)  | 0.45    | 1  | K.RMGPELENAR.V + Oxidation (M)          |            |
| NP 177294 |           | ATCEL3/ATGH9B3 ( Glycosyl Hydrolase 9B3) | A. thaliana                   | 916         |     |    | 594.7932  | 1187.5718 | 1187.5717 | 0.0002   | 1       | (24)  | 4.4     | 1  | K.RMGPELENAR.V + Oxidation (M)          |            |
| NP 177294 |           | ATCEL3/ATGH9B3 ( Glycosyl Hydrolase 9B3) | A. thaliana                   | 916         |     |    | 396.8646  | 1187.5720 | 1187.5717 | 0.0003   | 1       | (29)  | 1.6     | 3  | K.RMGPELENAR.V + Oxidation (M)          |            |
| NP 177294 |           | ATCEL3/ATGH9B3 ( Glycosyl Hydrolase 9B3) | A. thaliana                   | 916         |     |    | 687.8663  | 1373.7180 | 1373.7191 | -0.0010  | 0       | (66)  | 0.0003  | 1  | R.DVDYLDGNPK.M                          |            |
| NP 177294 |           | ATCEL3/ATGH9B3 ( Glycosyl Hydrolase 9B3) | A. thaliana                   | 916         |     |    | 687.8666  | 1373.7186 | 1373.7191 | -0.0004  | 0       | (61)  | 0.00082 | 1  | R.DVDYLDGNPK.M                          |            |
| NP 177294 |           | ATCEL3/ATGH9B3 ( Glycosyl Hydrolase 9B3) | A. thaliana                   | 916         |     |    | 687.8666  | 1373.7186 | 1373.7191 | -0.0004  | 0       | 71    | 8.3e-05 | 1  | R.DVDYLDGNPK.M                          |            |
| NP 177294 |           | ATCEL3/ATGH9B3 ( Glycosyl Hydrolase 9B3) | A. thaliana                   | 916         |     |    | 706.8608  | 1411.7070 | 1411.7096 | -0.0025  | 0       | (46)  | 0.024   | 1  | K.LYVGVGDPNVH.C                         |            |
| NP 177294 |           | ATCEL3/ATGH9B3 ( Glycosyl Hydrolase 9B3) | A. thaliana                   | 916         |     |    | 706.8608  | 1411.7070 | 1411.7096 | -0.0025  | 0       | (45)  | 0.035   | 1  | K.LYVGVGDPNVH.C                         |            |
| NP 177294 |           | ATCEL3/ATGH9B3 ( Glycosyl Hydrolase 9B3) | A. thaliana                   | 916         |     |    | 471.5766  | 1411.7080 | 1411.7096 | -0.0016  | 0       | (34)  | 0.41    | 1  | K.LYVGVGDPNVH.C                         |            |
| NP 177294 |           | ATCEL3/ATGH9B3 ( Glycosyl Hydrolase 9B3) | A. thaliana                   | 916         |     |    | 706.8613  | 1411.7080 | 1411.7096 | -0.0015  | 0       | 47    | 0.021   | 1  | K.LYVGVGDPNVH.C                         |            |
| NP 177294 |           | ATCEL3/ATGH9B3 ( Glycosyl Hydrolase 9B3) | A. thaliana                   | 916         |     |    | 706.8617  | 1411.7088 | 1411.7096 | -0.0007  | 0       | (39)  | 0.14    | 1  | K.LYVGVGDPNVH.C                         |            |
| NP 177294 |           | ATCEL3/ATGH9B3 ( Glycosyl Hydrolase 9B3) | A. thaliana                   | 916         |     |    | 471.5769  | 1411.7089 | 1411.7096 | -0.0007  | 0       | (35)  | 0.35    | 1  | K.LYVGVGDPNVH.C                         |            |
| NP 177294 |           | ATCEL3/ATGH9B3 ( Glycosyl Hydrolase 9B3) | A. thaliana                   | 916         |     |    | 471.5769  | 1411.7089 | 1411.7096 | -0.0007  | 0       | (38)  | 0.16    | 1  | K.LYVGVGDPNVH.C                         |            |
| NP 177294 |           | ATCEL3/ATGH9B3 ( Glycosyl Hydrolase 9B3) | A. thaliana                   | 916         |     |    | 706.8618  | 1411.7090 | 1411.7096 | -0.0005  | 0       | (32)  | 0.58    | 1  | K.LYVGVGDPNVH.C                         |            |
| NP 177294 |           | ATCEL3/ATGH9B3 ( Glycosyl Hydrolase 9B3) | A. thaliana                   | 916         |     |    | 765.9171  | 1529.8196 | 1529.8202 | -0.0005  | 1       | 64    | 0.00042 | 1  | K.RQVDYLDGNPK.M                         |            |
| NP 177294 |           | ATCEL3/ATGH9B3 ( Glycosyl Hydrolase 9B3) | A. thaliana                   | 916         |     |    | 510.9476  | 1529.8210 | 1529.8202 | 0.0008   | 1       | (22)  | 5.8     | 3  | K.RQVDYLDGNPK.M                         |            |
| NP 177294 |           | ATCEL3/ATGH9B3 ( Glycosyl Hydrolase 9B3) | A. thaliana                   | 916         |     |    | 715.3764  | 2143.1074 | 2143.1096 | -0.0022  | 0       | (68)  | 0.0012  | 1  | K.HTFNCGSSVIVNALISL.SK.R                |            |
| NP 177294 |           | ATCEL3/ATGH9B3 ( Glycosyl Hydrolase 9B3) | A. thaliana                   | 916         |     |    | 1072.5610 | 2143.1074 | 2143.1096 | -0.0021  | 0       | (73)  | 3.4e-05 | 1  | K.HTFNCGSSVIVNALISL.SK.R                |            |
| NP 177294 |           | ATCEL3/ATGH9B3 ( Glycosyl Hydrolase 9B3) | A. thaliana                   | 916         |     |    | 1072.5610 | 2143.1074 | 2143.1096 | -0.0021  | 0       | 80    | 7.1e-06 | 1  | K.HTFNCGSSVIVNALISL.SK.R                |            |
| NP 177294 |           | ATCEL3/ATGH9B3 ( Glycosyl Hydrolase 9B3) | A. thaliana                   | 916         |     |    | 715.3766  | 2143.1080 | 2143.1096 | -0.0016  | 0       | (63)  | 0.0037  | 1  | K.HTFNCGSSVIVNALISL.SK.R                |            |
| NP 177294 |           | ATCEL3/ATGH9B3 ( Glycosyl Hydrolase 9B3) | A. thaliana                   | 916         |     |    | 1072.5620 | 2143.1094 | 2143.1096 | -0.0001  | 0       | (77)  | 1.6e-05 | 1  | K.HTFNCGSSVIVNALISL.SK.R                |            |
| NP 177294 |           | ATCEL3/ATGH9B3 ( Glycosyl Hydrolase 9B3) | A. thaliana                   | 916         |     |    | 1087.0270 | 2172.0394 | 2172.0409 | -0.0014  | 0       | (104) | 2.8e-08 | 1  | K.LLPDPSSSSTQYTGGLMYK.L                 |            |
| NP 177294 |           | ATCEL3/ATGH9B3 ( Glycosyl Hydrolase 9B3) | A. thaliana                   | 916         |     |    | 1087.0280 | 2172.0414 | 2172.0409 | 0.0006   | 0       | 124   | 3e-10   | 1  | K.LLPDPSSSSTQYTGGLMYK.L                 |            |
| NP 177294 |           | ATCEL3/ATGH9B3 ( Glycosyl Hydrolase 9B3) | A. thaliana                   | 916         |     |    | 1095.0240 | 2188.0354 | 2188.0358 | -0.0023  | 0       | (93)  | 4.5e-07 | 1  | K.LLPDPSSSSTQYTGGLMYK.L + Oxidation (M) |            |
| NP 177294 |           | ATCEL3/ATGH9B3 ( Glycosyl Hydrolase 9B3) | A. thaliana                   | 916         |     |    | 1095.0240 | 2188.0354 | 2188.0358 | -0.0023  | 0       | (91)  | 7e-07   | 1  | K.LLPDPSSSSTQYTGGLMYK.L + Oxidation (M) |            |
| NP 177294 |           | ATCEL3/ATGH9B3 ( Glycosyl Hydrolase 9B3) | A. thaliana                   | 916         |     |    | 1095.0250 | 2188.0354 | 2188.0358 | 0.0003   | 0       | (99)  | 1.2e-07 | 1  | K.LLPDPSSSSTQYTGGLMYK.L + Oxidation (M) |            |
| NP 177294 |           | ATCEL3/ATGH9B3 ( Glycosyl Hydrolase 9B3) | A. thaliana                   | 916         |     |    | 730.3529  | 2188.0366 | 2188.0368 | 0.0008   | 0       | (38)  | 0.17    | 1  | K.LLPDPSSSSTQYTGGLMYK.L + Oxidation (M) |            |
| NP 177294 |           | ATCEL3/ATGH9B3 ( Glycosyl Hydrolase 9B3) | A. thaliana                   | 916         |     |    | 876.3986  | 2626.1740 | 2626.1783 | -0.0044  | 0       | (52)  | 0.0035  | 1  | R.ASSGLSDGSAHVDLTGGYYDAGDNV.K.F         |            |
| NP 177294 |           | ATCEL3/ATGH9B3 ( Glycosyl Hydrolase 9B3) | A. thaliana                   | 916         |     |    | 1314.0950 | 2626.1754 | 2626.1783 | -0.0029  | 0       | (56)  | 0.0013  | 1  | R.ASSGLSDGSAHVDLTGGYYDAGDNV.K.F         |            |
| NP 177294 |           | ATCEL3/ATGH9B3 ( Glycosyl Hydrolase 9B3) | A. thaliana                   | 916         |     |    | 876.3995  | 2626.1767 | 2626.1783 | -0.0017  | 0       | (55)  | 0.0017  | 1  | R.ASSGLSDGSAHVDLTGGYYDAGDNV.K.F         |            |
| NP 177294 |           | ATCEL3/ATGH9B3 ( Glycosyl Hydrolase 9B3) | A. thaliana                   | 916         |     |    | 876.4002  | 2626.1788 | 2626.1783 | 0.0004   | 0       | (53)  | 0.0027  | 1  | R.ASSGLSDGSAHVDLTGGYYDAGDNV.K.F         |            |
| NP 177294 |           | ATCEL3/ATGH9B3 ( Glycosyl Hydrolase 9B3) | A. thaliana                   | 916         |     |    | 1314.0970 | 2626.1794 | 2626.1783 | 0.0011   | 0       | 57    | 0.0012  | 1  | R.ASSGLSDGSAHVDLTGGYYDAGDNV.K.F         |            |
| 9         | NP 196455 | AT5G08380                                | ATAGAL1 alpha-galactosidase 1 | A. thaliana | 536 | 11 | 27        | 300.8892  | 599.3638  | 599.3643 | -0.0004 | 0     | (17)    | 27 | 3                                       | K.GSLVPK.K |
| NP 196455 |           | ATAGAL1 alpha-galactosidase 1            | A. thaliana                   | 536         |     |    | 300.8893  | 599.3640  | 599.3643  | -0.0002  | 0       | 33    | 0.65    | 1  | K.GSLVPK.K                              |            |
| NP 196455 |           | ATAGAL1 alpha-galactosidase 1            | A. thaliana                   | 536         |     |    | 300.8893  | 599.3640  | 599.3643  | -0.0002  | 0       | (24)  | 5.7     | 1  | K.GSLVPK.K                              |            |
| NP 196455 |           | ATAGAL1 alpha-galactosidase 1            | A. thaliana                   | 536         |     |    | 383.6991  | 765.3836  | 765.3843  | -0.0007  | 0       | (18)  | 26      | 1  | R.YPVMTR.A                              |            |
| NP 196455 |           | ATAGAL1 alpha-galactosidase 1            | A. thaliana                   | 536         |     |    | 383.6994  | 765.3842  | 765.3843  | -0.0001  | 0       | (17)  | 36      | 3  | R.YPVMTR.A                              |            |
| NP 196455 |           | ATAGAL1 alpha-galactosidase 1            | A. thaliana                   | 536         |     |    | 391.6967  | 781.3788  | 781.3793  | -0.0004  | 0       | (28)  | 2.2     | 1  | R.YPVMTR.A + Oxidation (M)              |            |
| NP 196455 |           | ATAGAL1 alpha-galactosidase 1            | A. thaliana                   | 536         |     |    | 391.6968  | 781.3790  | 781.3793  | -0.0002  | 0       | (20)  | 13      | 2  | R.YPVMTR.A + Oxidation (M)              |            |
| NP 196455 |           | ATAGAL1 alpha-galactosidase 1            | A. thaliana                   | 536         |     |    | 391.6968  | 781.3790  | 781.3793  | -0.0002  | 0       | (21)  | 10      | 2  | R.YPVMTR.A + Oxidation (M)              |            |
| NP 196455 |           | ATAGAL1 alpha-galactosidase 1            | A. thaliana                   | 536         |     |    | 391.6968  | 781.3790  | 781.3793  | -0.0002  | 0       | (18)  | 18      | 1  | R.YPVMTR.A + Oxidation (M)              |            |
| NP 196455 |           | ATAGAL1 alpha-galactosidase 1            | A. thaliana                   | 536         |     |    | 391.6968  | 781.3790  | 781.3793  | -0.0002  | 0       | 29    | 1.7     | 1  | R.YPVMTR.A + Oxidation (M)              |            |
| NP 196455 |           | ATAGAL1 alpha-galactosidase 1            | A. thaliana                   | 536         |     |    | 391.6968  | 781.3790  | 781.3793  | -0.0002  | 0       | (26)  | 3.5     | 3  | R.YPVMTR.A + Oxidation (M)              |            |
| NP 196455 |           | ATAGAL1 alpha-galactosidase 1            | A. thaliana                   | 536         |     |    | 451.7889  | 901.5632  | 901.5637  | -0.0004  | 0       | 25    | 4.4     | 1  | K.LYVLPV.A                              |            |
| NP 196455 |           | ATAGAL1 alpha-galactosidase 1            | A. thaliana                   | 536         |     |    | 482.7760  | 963.5374  | 963.5389  | -0.0015  | 1       | (14)  | 58      | 7  | K.KSTFPSSGK.A                           |            |
| NP 196455 |           | ATAGAL1 alpha-galactosidase 1            | A. thaliana                   | 536         |     |    | 482.7764  | 963.5382  | 963.5389  | -0.0007  | 1       | (19)  | 19      | 1  | K.KSTFPSSGK.A                           |            |
| NP 196455 |           | ATAGAL1 alpha-galactosidase 1            | A. thaliana                   | 536         |     |    | 482.7766  | 963.5386  | 963.5389  | -0.0003  | 1       | (18)  | 21      | 2  | K.KSTFPSSGK.A                           |            |
| NP 196455 |           | ATAGAL1 alpha-galactosidase 1            | A. thaliana                   | 536         |     |    | 482.7766  | 963.5386  | 963.5389  | -0.0003  | 1       | (25)  | 4       | 1  | K.KSTFPSSGK.A                           |            |
| NP 196455 |           | ATAGAL1 alpha-galactosidase 1            | A. thaliana                   | 536         |     |    | 482.7766  | 963.5386  | 963.5389  | -0.0003  | 1       | (32)  | 0.84    | 1  | K.KSTFPSSGK.A                           |            |
| NP 196455 |           | ATAGAL1 alpha-galactosidase 1            | A. thaliana                   | 536         |     |    | 482.7767  | 963.5388  | 963.5389  | -0.0001  | 1       | (27)  | 2.5     | 1  | K.KSTFPSSGK.A                           |            |
| NP 196455 |           | ATAGAL1 alpha-galactosidase 1            | A. thaliana                   | 536         |     |    | 482.7767  | 963.5388  | 963.5389  | -0.0001  | 1       | 38    | 0.21    | 1  | K.KSTFPSSGK.A                           |            |
| NP 196455 |           | ATAGAL1 alpha-galactosidase 1            | A. thaliana                   | 536         |     |    | 495.2559  | 988.4972  | 988.4978  | -0.0005  | 0       | 50    | 0.013   | 1  | K.AVADYHSK.G                            |            |
| NP 196455 |           | ATAGAL1 alpha-galactosidase 1            | A. thaliana                   | 536         |     |    | 330.5064  | 988.4974  | 988.4978  | -0.0004  | 0       | (17)  | 32      | 7  | K.AVADYHSK.G                            |            |
| NP 196455 |           | ATAGAL1 alpha-galactosidase 1            | A. thaliana                   | 536         |     |    | 330.5064  | 988.4974  | 988.4978  | -0.0004  | 0       | (20)  | 16      | 1  | K.AVADYHSK.G                            |            |
| NP 196455 |           | ATAGAL1 alpha-galactosidase 1            | A. thaliana                   | 536         |     |    | 495.2560  | 988.4974  | 988.4978  | -0.0003  | 0       | (27)  | 2.6     | 1  | K.AVADYHSK.G                            |            |
| NP 196455 |           | ATAGAL1 alpha-galactosidase 1            | A. thaliana                   | 536         |     |    | 495.2560  | 988.4974  | 988.4978  | -0.0003  | 0       | (26)  | 3.9     | 1  | K.AVADYHSK.G                            |            |
| NP 196455 |           | ATAGAL1 alpha-galactosidase 1            | A. thaliana                   | 536         |     |    | 495.2560  | 988.4974  | 988.4978  | -0.0003  | 0       | (46)  | 0.035   | 1  | K.AVADYHSK.G                            |            |
| NP 196455 |           | ATAGAL1 alpha-galactosidase 1            | A. thaliana                   | 536         |     |    | 495.2560  | 988.4974  | 988.4978  | -0.0003  | 0       | (43)  | 0.068   | 1  | K.AVADYHSK.G                            |            |
| NP 196455 |           | ATAGAL1 alpha-galactosidase 1            | A. thaliana                   | 536         |     |    | 330.5067  | 988.4983  | 988.4978  | 0.0005   | 0       | (15)  | 43      | 2  | K.AVADYHSK.G                            |            |
| NP 196455 |           | ATAGAL1 alpha-galactosidase 1            | A. thaliana                   | 536         |     |    | 517.7626  | 1033.5106 | 1033.5114 | -0.0007  | 0       | (22)  | 8.7     | 1  | K.ETMEIVANK.E                           |            |
| NP 196455 |           | ATAGAL1 alpha-galactosidase 1            | A. thaliana                   | 536         |     |    | 517.7629  | 1033.5112 | 1033.5114 | -0.0001  | 0       | (23)  | 7.4     | 1  | K.ETMEIVANK.E                           |            |
| NP 196455 |           | ATAGAL1 alpha-galactosidase 1            | A. thaliana                   | 536         |     |    | 517.7629  | 1033.5112 | 1033.5114 | -0.0001  | 0       | (17)  | 25      | 1  | K.ETMEIVANK.E                           |            |
| NP 196455 |           | ATAGAL1 alpha-galactosidase 1            | A. thaliana                   | 536         |     |    |           |           |           |          |         |       |         |    |                                         |            |

|           |           |                               |                                               |             |     |    |          |           |           |           |         |      |         |         |                                    |                                     |
|-----------|-----------|-------------------------------|-----------------------------------------------|-------------|-----|----|----------|-----------|-----------|-----------|---------|------|---------|---------|------------------------------------|-------------------------------------|
| NP 196455 |           | ATAGAL1 alpha-galactosidase 1 | A. thaliana                                   | 536         |     |    | 564.3156 | 1126.6166 | 1126.6169 | -0.0002   | 0       | 44   | 0.043   | 1       | K.AP.LLLGCDIR.N                    |                                     |
| NP 196455 |           | ATAGAL1 alpha-galactosidase 1 | A. thaliana                                   | 536         |     |    | 767.8444 | 1533.6742 | 1533.6769 | -0.0027   | 0       | 69   | 0.00012 | 1       | K.T.MPGSLGYEEHDAKT                 |                                     |
| NP 196455 |           | ATAGAL1 alpha-galactosidase 1 | A. thaliana                                   | 536         |     |    | 767.8462 | 1533.6778 | 1533.6769 | -0.0009   | 0       | (62) | 0.00063 | 1       | K.T.MPGSLGYEEHDAKT                 |                                     |
| NP 196455 |           | ATAGAL1 alpha-galactosidase 1 | A. thaliana                                   | 536         |     |    | 775.8428 | 1549.6710 | 1549.6719 | -0.0008   | 0       | (68) | 0.00017 | 1       | K.T.MPGSLGYEEHDAKT + Oxidation (M) |                                     |
| NP 196455 |           | ATAGAL1 alpha-galactosidase 1 | A. thaliana                                   | 536         |     |    | 775.8428 | 1549.6710 | 1549.6719 | -0.0008   | 0       | (68) | 0.00017 | 1       | K.T.MPGSLGYEEHDAKT + Oxidation (M) |                                     |
| NP 196455 |           | ATAGAL1 alpha-galactosidase 1 | A. thaliana                                   | 536         |     |    | 517.5643 | 1549.6711 | 1549.6719 | -0.0008   | 0       | (18) | 16      | 1       | K.T.MPGSLGYEEHDAKT + Oxidation (M) |                                     |
| NP 196455 |           | ATAGAL1 alpha-galactosidase 1 | A. thaliana                                   | 536         |     |    | 517.5643 | 1549.6711 | 1549.6719 | -0.0008   | 0       | (29) | 1.2     | 1       | K.T.MPGSLGYEEHDAKT + Oxidation (M) |                                     |
| NP 196455 |           | ATAGAL1 alpha-galactosidase 1 | A. thaliana                                   | 536         |     |    | 517.5644 | 1549.6714 | 1549.6719 | -0.0005   | 0       | (20) | 9.1     | 1       | K.T.MPGSLGYEEHDAKT + Oxidation (M) |                                     |
| NP 196455 |           | ATAGAL1 alpha-galactosidase 1 | A. thaliana                                   | 536         |     |    | 517.5645 | 1549.6717 | 1549.6719 | -0.0002   | 0       | (18) | 16      | 1       | K.T.MPGSLGYEEHDAKT + Oxidation (M) |                                     |
| NP 196455 |           | ATAGAL1 alpha-galactosidase 1 | A. thaliana                                   | 536         |     |    | 775.8432 | 1549.6718 | 1549.6719 | -0.0000   | 0       | (49) | 0.012   | 1       | K.T.MPGSLGYEEHDAKT + Oxidation (M) |                                     |
| NP 196455 |           | ATAGAL1 alpha-galactosidase 1 | A. thaliana                                   | 536         |     |    | 791.3658 | 1580.7170 | 1580.7181 | -0.0010   | 0       | 74   | 3.4e-05 | 1       | K.LGYSDAGYFTCSKT                   |                                     |
| NP 196455 |           | ATAGAL1 alpha-galactosidase 1 | A. thaliana                                   | 536         |     |    | 806.8541 | 1611.6936 | 1611.6947 | -0.0011   | 0       | (60) | 0.00088 | 1       | K.YDNCNSDGSKPTVRY                  |                                     |
| NP 196455 |           | ATAGAL1 alpha-galactosidase 1 | A. thaliana                                   | 536         |     |    | 806.8541 | 1611.6936 | 1611.6947 | -0.0011   | 0       | 63   | 0.00052 | 1       | K.YDNCNSDGSKPTVRY                  |                                     |
| NP 196455 |           | ATAGAL1 alpha-galactosidase 1 | A. thaliana                                   | 536         |     |    | 538.2386 | 1611.6940 | 1611.6947 | -0.0008   | 0       | (27) | 2       | 1       | K.YDNCNSDGSKPTVRY                  |                                     |
| NP 196455 |           | ATAGAL1 alpha-galactosidase 1 | A. thaliana                                   | 536         |     |    | 506.8543 | 1611.6940 | 1611.6947 | -0.0007   | 0       | (56) | 0.0022  | 1       | K.YDNCNSDGSKPTVRY                  |                                     |
| NP 196455 |           | ATAGAL1 alpha-galactosidase 1 | A. thaliana                                   | 536         |     |    | 538.2387 | 1611.6943 | 1611.6947 | -0.0005   | 0       | (45) | 0.031   | 1       | K.YDNCNSDGSKPTVRY                  |                                     |
| NP 196455 |           | ATAGAL1 alpha-galactosidase 1 | A. thaliana                                   | 536         |     |    | 538.2388 | 1611.6946 | 1611.6947 | -0.0002   | 0       | (48) | 0.015   | 1       | K.YDNCNSDGSKPTVRY                  |                                     |
| NP 196455 |           | ATAGAL1 alpha-galactosidase 1 | A. thaliana                                   | 536         |     |    | 809.9291 | 1617.8436 | 1617.8475 | -0.0038   | 0       | 80   | 1.1e-05 | 1       | K.EVAINQDPHGVOAKK                  |                                     |
| NP 196455 |           | ATAGAL1 alpha-galactosidase 1 | A. thaliana                                   | 536         |     |    | 540.2892 | 1617.8458 | 1617.8475 | -0.0017   | 0       | (30) | 1.1     | 1       | K.EVAINQDPHGVOAKK                  |                                     |
| NP 196455 |           | ATAGAL1 alpha-galactosidase 1 | A. thaliana                                   | 536         |     |    | 809.9303 | 1617.8460 | 1617.8475 | -0.0014   | 0       | (67) | 0.00019 | 1       | K.EVAINQDPHGVOAKK                  |                                     |
| NP 196455 |           | ATAGAL1 alpha-galactosidase 1 | A. thaliana                                   | 536         |     |    | 809.9305 | 1617.8464 | 1617.8475 | -0.0010   | 0       | (61) | 0.00075 | 1       | K.EVAINQDPHGVOAKK                  |                                     |
| NP 196455 |           | ATAGAL1 alpha-galactosidase 1 | A. thaliana                                   | 536         |     |    | 540.2896 | 1617.8470 | 1617.8475 | -0.0005   | 0       | (33) | 0.49    | 1       | K.EVAINQDPHGVOAKK                  |                                     |
| NP 196455 |           | ATAGAL1 alpha-galactosidase 1 | A. thaliana                                   | 536         |     |    | 809.9309 | 1617.8472 | 1617.8475 | -0.0002   | 0       | (67) | 0.00018 | 1       | K.EVAINQDPHGVOAKK                  |                                     |
| 9         | NP 190481 | AT3G049120                    | ATPERX34; peroxidase 34                       | A. thaliana | 408 | 9  | 25       | 372.2419  | 742.4692  | 742.4701  | -0.0008 | 0    | (39)    | 0.16    | 1                                  | R.IAASLR.L                          |
|           | NP 190481 |                               | ATPERX34; peroxidase 34                       | A. thaliana | 408 |    |          | 372.2421  | 742.4696  | 742.4701  | -0.0004 | 0    | (33)    | 0.59    | 1                                  | R.IAASLR.L                          |
|           | NP 190481 |                               | ATPERX34; peroxidase 34                       | A. thaliana | 408 |    |          | 372.2422  | 742.4698  | 742.4701  | -0.0002 | 0    | (21)    | 11      | 6                                  | R.IAASLR.L                          |
|           | NP 190481 |                               | ATPERX34; peroxidase 34                       | A. thaliana | 408 |    |          | 372.2422  | 742.4698  | 742.4701  | -0.0002 | 0    | 41      | 0.11    | 1                                  | R.IAASLR.L                          |
|           | NP 190481 |                               | ATPERX34; peroxidase 34                       | A. thaliana | 408 |    |          | 400.2207  | 798.4268  | 798.4276  | -0.0007 | 0    | (17)    | 26      | 7                                  | K.YVYNLKE                           |
|           | NP 190481 |                               | ATPERX34; peroxidase 34                       | A. thaliana | 408 |    |          | 400.2209  | 798.4272  | 798.4276  | -0.0003 | 0    | 21      | 10      | 3                                  | K.YVYNLKE                           |
|           | NP 190481 |                               | ATPERX34; peroxidase 34                       | A. thaliana | 408 |    |          | 400.2210  | 798.4274  | 798.4276  | -0.0001 | 0    | (18)    | 19      | 2                                  | K.YVYNLKE                           |
|           | NP 190481 |                               | ATPERX34; peroxidase 34                       | A. thaliana | 408 |    |          | 402.2240  | 802.4334  | 802.4337  | -0.0003 | 0    | (17)    | 35      | 5                                  | R.GFPVIDR.M                         |
|           | NP 190481 |                               | ATPERX34; peroxidase 34                       | A. thaliana | 408 |    |          | 402.2241  | 802.4336  | 802.4337  | -0.0001 | 0    | (25)    | 5.4     | 2                                  | R.GFPVIDR.M                         |
|           | NP 190481 |                               | ATPERX34; peroxidase 34                       | A. thaliana | 408 |    |          | 402.2241  | 802.4336  | 802.4337  | -0.0001 | 0    | 26      | 3.9     | 3                                  | R.GFPVIDR.M                         |
|           | NP 190481 |                               | ATPERX34; peroxidase 34                       | A. thaliana | 408 |    |          | 461.2369  | 920.4592  | 920.4604  | -0.0011 | 0    | (26)    | 4.5     | 1                                  | R.TPTVFNK.Y                         |
|           | NP 190481 |                               | ATPERX34; peroxidase 34                       | A. thaliana | 408 |    |          | 461.2372  | 920.4598  | 920.4604  | -0.0005 | 0    | (28)    | 2.6     | 1                                  | R.TPTVFNK.Y                         |
|           | NP 190481 |                               | ATPERX34; peroxidase 34                       | A. thaliana | 408 |    |          | 461.2373  | 920.4600  | 920.4604  | -0.0003 | 0    | 33      | 0.96    | 1                                  | R.TPTVFNK.Y                         |
|           | NP 190481 |                               | ATPERX34; peroxidase 34                       | A. thaliana | 408 |    |          | 461.2373  | 920.4600  | 920.4604  | -0.0003 | 0    | (25)    | 5.1     | 1                                  | R.TPTVFNK.Y                         |
|           | NP 190481 |                               | ATPERX34; peroxidase 34                       | A. thaliana | 408 |    |          | 461.2374  | 920.4602  | 920.4604  | -0.0001 | 0    | (30)    | 1.6     | 1                                  | R.TPTVFNK.Y                         |
|           | NP 190481 |                               | ATPERX34; peroxidase 34                       | A. thaliana | 408 |    |          | 487.2691  | 872.5236  | 872.5240  | -0.0003 | 0    | 33      | 0.63    | 1                                  | R.ETINELR.S                         |
|           | NP 190481 |                               | ATPERX34; peroxidase 34                       | A. thaliana | 408 |    |          | 487.2692  | 872.5238  | 872.5240  | -0.0001 | 0    | (30)    | 1.4     | 1                                  | R.ETINELR.S                         |
|           | NP 190481 |                               | ATPERX34; peroxidase 34                       | A. thaliana | 408 |    |          | 511.7356  | 1021.4566 | 1021.4577 | -0.0011 | 0    | (51)    | 0.012   | 1                                  | K.DAFGNANSAR.G                      |
|           | NP 190481 |                               | ATPERX34; peroxidase 34                       | A. thaliana | 408 |    |          | 511.7358  | 1021.4570 | 1021.4577 | -0.0007 | 0    | (57)    | 0.0029  | 1                                  | K.DAFGNANSAR.G                      |
|           | NP 190481 |                               | ATPERX34; peroxidase 34                       | A. thaliana | 408 |    |          | 511.7359  | 1021.4572 | 1021.4577 | -0.0005 | 0    | (52)    | 0.0098  | 1                                  | K.DAFGNANSAR.G                      |
|           | NP 190481 |                               | ATPERX34; peroxidase 34                       | A. thaliana | 408 |    |          | 511.7360  | 1021.4574 | 1021.4577 | -0.0003 | 0    | (45)    | 0.04    | 1                                  | K.DAFGNANSAR.G                      |
|           | NP 190481 |                               | ATPERX34; peroxidase 34                       | A. thaliana | 408 |    |          | 511.7360  | 1021.4574 | 1021.4577 | -0.0003 | 0    | 59      | 0.0017  | 1                                  | K.DAFGNANSAR.G                      |
|           | NP 190481 |                               | ATPERX34; peroxidase 34                       | A. thaliana | 408 |    |          | 518.2770  | 1034.5394 | 1034.5397 | -0.0002 | 0    | 52      | 0.0086  | 1                                  | R.SALVDFDLR.T                       |
|           | NP 190481 |                               | ATPERX34; peroxidase 34                       | A. thaliana | 408 |    |          | 787.9006  | 1573.7866 | 1573.7883 | -0.0016 | 0    | 81      | 7.3e-06 | 1                                  | R.MGNITPTTGTGGQIR.L                 |
|           | NP 190481 |                               | ATPERX34; peroxidase 34                       | A. thaliana | 408 |    |          | 787.9009  | 1573.7872 | 1573.7883 | -0.0010 | 0    | (66)    | 0.00027 | 1                                  | R.MGNITPTTGTGGQIR.L + Oxidation (M) |
|           | NP 190481 |                               | ATPERX34; peroxidase 34                       | A. thaliana | 408 |    |          | 795.8977  | 1589.7808 | 1589.7832 | -0.0023 | 0    | (61)    | 0.0008  | 1                                  | R.MGNITPTTGTGGQIR.L + Oxidation (M) |
|           | NP 190481 |                               | ATPERX34; peroxidase 34                       | A. thaliana | 408 |    |          | 795.8979  | 1589.7812 | 1589.7832 | -0.0019 | 0    | (57)    | 0.0017  | 1                                  | R.MGNITPTTGTGGQIR.L + Oxidation (M) |
|           | NP 190481 |                               | ATPERX34; peroxidase 34                       | A. thaliana | 408 |    |          | 795.8984  | 1589.7822 | 1589.7832 | -0.0009 | 0    | (66)    | 0.00022 | 1                                  | R.MGNITPTTGTGGQIR.L + Oxidation (M) |
|           | NP 190481 |                               | ATPERX34; peroxidase 34                       | A. thaliana | 408 |    |          | 795.8985  | 1589.7824 | 1589.7832 | -0.0007 | 0    | (69)    | 0.00012 | 1                                  | R.MGNITPTTGTGGQIR.L + Oxidation (M) |
|           | NP 190481 |                               | ATPERX34; peroxidase 34                       | A. thaliana | 408 |    |          | 714.0427  | 2139.1063 | 2139.1073 | -0.0010 | 0    | 62      | 0.00045 | 1                                  | R.NVGLDRPSDLVLSGGHTFGK.N            |
|           | NP 190481 |                               | ATPERX34; peroxidase 34                       | A. thaliana | 408 |    |          | 714.0427  | 2139.1063 | 2139.1073 | -0.0010 | 0    | (54)    | 0.003   | 1                                  | R.NVGLDRPSDLVLSGGHTFGK.N            |
| 10        | NP 567585 | AT5G19410                     | pectinacetyltransferase                       | A. thaliana | 295 | 8  | 20       | 354.1952  | 706.3758  | 706.3762  | -0.0004 | 0    | (17)    | 33      | 4                                  | K.TVOGFR.D                          |
|           | NP 567585 |                               | pectinacetyltransferase                       | A. thaliana | 295 |    |          | 354.1955  | 706.3764  | 706.3762  | 0.0002  | 0    | 20      | 18      | 2                                  | K.TVOGFR.D                          |
|           | NP 567585 |                               | pectinacetyltransferase                       | A. thaliana | 295 |    |          | 441.2638  | 880.5130  | 880.5130  | 0.0000  | 0    | (36)    | 0.28    | 1                                  | K.VVALHGSAS.K                       |
|           | NP 567585 |                               | pectinacetyltransferase                       | A. thaliana | 295 |    |          | 441.2639  | 880.5132  | 880.5130  | 0.0002  | 0    | 47      | 0.026   | 1                                  | K.VVALHGSAS.K                       |
|           | NP 567585 |                               | pectinacetyltransferase                       | A. thaliana | 295 |    |          | 481.2544  | 960.4942  | 960.4950  | -0.0008 | 0    | 45      | 0.049   | 1                                  | R.AVVDDLMAK.G                       |
|           | NP 567585 |                               | pectinacetyltransferase                       | A. thaliana | 295 |    |          | 489.2520  | 976.4894  | 976.4899  | -0.0005 | 0    | (37)    | 0.25    | 1                                  | R.AVVDDLMAK.G + Oxidation (M)       |
|           | NP 567585 |                               | pectinacetyltransferase                       | A. thaliana | 295 |    |          | 489.7498  | 977.4850  | 977.4852  | -0.0001 | 0    | 17      | 30      | 1                                  | K.SLPVSTSK.M                        |
|           | NP 567585 |                               | pectinacetyltransferase                       | A. thaliana | 295 |    |          | 514.2926  | 1026.5708 | 1026.5710 | -0.0003 | 0    | (29)    | 1.5     | 1                                  | K.NVLAPTAVDK.G                      |
|           | NP 567585 |                               | pectinacetyltransferase                       | A. thaliana | 295 |    |          | 514.2927  | 1026.5708 | 1026.5710 | -0.0001 | 0    | (30)    | 1.2     | 1                                  | K.NVLAPTAVDK.G                      |
|           | NP 567585 |                               | pectinacetyltransferase                       | A. thaliana | 295 |    |          | 514.2928  | 1026.5710 | 1026.5710 | 0.0001  | 0    | 33      | 0.68    | 1                                  | K.NVLAPTAVDK.G                      |
|           | NP 567585 |                               | pectinacetyltransferase                       | A. thaliana | 295 |    |          | 549.2848  | 1098.5550 | 1098.5553 | -0.0003 | 0    | 51      | 0.0072  | 1                                  | K.DFGFSGLGGK.Q                      |
|           | NP 567585 |                               | pectinacetyltransferase                       | A. thaliana | 295 |    |          | 549.2853  | 1098.5560 | 1098.5553 | 0.0007  | 0    | (49)    | 0.016   | 1                                  | K.DFGFSGLGGK.Q                      |
|           | NP 567585 |                               | pectinacetyltransferase                       | A. thaliana | 295 |    |          | 384.5430  | 1150.6072 | 1150.6095 | -0.0023 | 0    | (18)    | 26      | 2                                  | R.ALSPVHSTPSR.G                     |
|           | NP 567585 |                               | pectinacetyltransferase                       | A. thaliana | 295 |    |          | 384.5437  | 1150.6093 | 1150.6095 | -0.0002 | 0    | (22)    | 9.9     | 1                                  | R.ALSPVHSTPSR.G                     |
|           | NP 567585 |                               | pectinacetyltransferase                       | A. thaliana | 295 |    |          | 576.3120  | 1150.6094 | 1150.6095 | -0.0000 | 0    | (50)    | 0.015   | 1                                  | R.ALSPVHSTPSR.G                     |
|           | NP 567585 |                               | pectinacetyltransferase                       | A. thaliana | 295 |    |          | 384.5438  | 1150.6096 | 1150.6095 | 0.0001  | 0    | (17)    | 27      | 4                                  | R.ALSPVHSTPSR.G                     |
|           | NP 567585 |                               | pectinacetyltransferase                       | A. thaliana | 295 |    |          | 576.3121  | 1150.6096 | 1150.6095 | 0.0002  | 0    | (50)    | 0.014   | 1                                  | R.ALSPVHSTPSR.G                     |
|           | NP 567585 |                               | pectinacetyltransferase                       | A. thaliana | 295 |    |          | 576.3121  | 1150.6096 | 1150.6095 | 0.0002  | 0    | 52      | 0.01    | 1                                  | R.ALSPVHSTPSR.G                     |
|           | NP 567585 |                               | pectinacetyltransferase                       | A. thaliana | 295 |    |          | 384.5439  | 1150.6099 | 1150.6095 | 0.0004  | 0    | (19)    | 20      | 2                                  | R.ALSPVHSTPSR.G                     |
|           | NP 567585 |                               | pectinacetyltransferase                       | A. thaliana | 295 |    |          | 576.3123  | 1150.6100 | 1150.6095 | 0.0006  | 0    | (46)    | 0.035   | 1                                  | R.ALSPVHSTPSR.G                     |
|           | NP 567585 |                               | pectinacetyltransferase                       | A. thaliana | 295 |    |          | 569.9307  | 1706.7703 | 1706.7723 | -0.0020 | 0    | 32      | 0.06    | 1                                  | K.GAVCLDGSAPAYHFDK.G                |
| 11        | AAF69828  | AT5G06870                     | PGIP2; polygalacturonase inhibiting protein 2 | A. thaliana | 739 | 16 | 51       | 302.1765  | 602.3384  | 602.3388  | -0.0003 | 0    | (17)    | 57      | 6                                  | R.IDLSR.N                           |
|           | AAF69828  |                               | PGIP2; polygalacturonase inhibiting protein 2 | A. thaliana | 739 |    |          | 302.1765  | 602.3384  | 602.3388  | -0.0003 | 0    | (28)    | 4.4     | 1                                  | R.IDLSR.N                           |
|           | AAF69828  |                               | PGIP2; polygalacturonase inhibiting protein 2 | A. thaliana | 739 | </ |          |           |           |           |         |      |         |         |                                    |                                     |



|    |           |           |                                               |             |     |   |    |           |           |           |         |   |      |         |   |                                          |
|----|-----------|-----------|-----------------------------------------------|-------------|-----|---|----|-----------|-----------|-----------|---------|---|------|---------|---|------------------------------------------|
|    | AAF69828  |           | PGIP2: polygalacturonase inhibiting protein 2 | A. thaliana | 739 |   |    | 302.1766  | 602.3386  | 602.3388  | -0.0001 | 0 | (29) | 3.6     | 1 | R.IDLSR.N                                |
|    | AAF69828  |           | PGIP2: polygalacturonase inhibiting protein 2 | A. thaliana | 739 |   |    | 302.1766  | 602.3386  | 602.3388  | -0.0001 | 0 | 30   | 3       | 1 | R.IDLSR.N                                |
|    | AAF69828  |           | PGIP2: polygalacturonase inhibiting protein 2 | A. thaliana | 739 |   |    | 302.1767  | 602.3388  | 602.3388  | 0.0001  | 0 | (18) | 4.7     | 6 | R.IDLSR.N                                |
|    | AAF69828  |           | PGIP2: polygalacturonase inhibiting protein 2 | A. thaliana | 739 |   |    | 382.2263  | 762.4380  | 762.4388  | -0.0008 | 0 | (31) | 1.5     | 2 | K.NLTLR.L                                |
|    | AAF69828  |           | PGIP2: polygalacturonase inhibiting protein 2 | A. thaliana | 739 |   |    | 382.2264  | 762.4382  | 762.4388  | -0.0006 | 0 | 33   | 0.86    | 1 | K.NLTLR.L                                |
|    | AAF69828  |           | PGIP2: polygalacturonase inhibiting protein 2 | A. thaliana | 739 |   |    | 383.1976  | 764.3806  | 764.3817  | -0.0010 | 0 | (21) | 12      | 6 | K.GEYQRF.F                               |
|    | AAF69828  |           | PGIP2: polygalacturonase inhibiting protein 2 | A. thaliana | 739 |   |    | 383.1979  | 764.3812  | 764.3817  | -0.0004 | 0 | (23) | 7.9     | 2 | K.GEYQRF.F                               |
|    | AAF69828  |           | PGIP2: polygalacturonase inhibiting protein 2 | A. thaliana | 739 |   |    | 383.1980  | 764.3814  | 764.3817  | -0.0002 | 0 | 24   | 5.9     | 5 | K.GEYQRF.F                               |
|    | AAF69828  |           | PGIP2: polygalacturonase inhibiting protein 2 | A. thaliana | 739 |   |    | 383.1981  | 764.3816  | 764.3817  | -0.0000 | 0 | (19) | 18      | 4 | K.GEYQRF.F                               |
|    | AAF69828  |           | PGIP2: polygalacturonase inhibiting protein 2 | A. thaliana | 739 |   |    | 467.2658  | 932.5170  | 932.5179  | -0.0008 | 1 | (23) | 7.2     | 1 | K.DDKTTLK.I                              |
|    | AAF69828  |           | PGIP2: polygalacturonase inhibiting protein 2 | A. thaliana | 739 |   |    | 467.2660  | 932.5174  | 932.5179  | -0.0004 | 1 | (16) | 36      | 8 | K.DDKTTLK.I                              |
|    | AAF69828  |           | PGIP2: polygalacturonase inhibiting protein 2 | A. thaliana | 739 |   |    | 467.2660  | 932.5174  | 932.5179  | -0.0004 | 1 | (24) | 6       | 2 | K.DDKTTLK.I                              |
|    | AAF69828  |           | PGIP2: polygalacturonase inhibiting protein 2 | A. thaliana | 739 |   |    | 467.2660  | 932.5174  | 932.5179  | -0.0004 | 1 | (20) | 16      | 3 | K.DDKTTLK.I                              |
|    | AAF69828  |           | PGIP2: polygalacturonase inhibiting protein 2 | A. thaliana | 739 |   |    | 467.2660  | 932.5174  | 932.5179  | -0.0004 | 1 | 25   | 4.4     | 2 | K.DDKTTLK.I                              |
|    | AAF69828  |           | PGIP2: polygalacturonase inhibiting protein 2 | A. thaliana | 739 |   |    | 467.2660  | 932.5174  | 932.5179  | -0.0004 | 1 | (22) | 9.1     | 3 | K.DDKTTLK.I                              |
|    | AAF69828  |           | PGIP2: polygalacturonase inhibiting protein 2 | A. thaliana | 739 |   |    | 502.8160  | 1003.6174 | 1003.6178 | -0.0004 | 1 | 43   | 0.068   | 1 | K.KNLTFLR.L                              |
|    | AAF69828  |           | PGIP2: polygalacturonase inhibiting protein 2 | A. thaliana | 739 |   |    | 534.7586  | 1067.5026 | 1067.5036 | -0.0010 | 0 | (42) | 0.069   | 1 | K.SLGNPQF.R.I                            |
|    | AAF69828  |           | PGIP2: polygalacturonase inhibiting protein 2 | A. thaliana | 739 |   |    | 534.7590  | 1067.5034 | 1067.5036 | -0.0002 | 0 | 54   | 0.0043  | 1 | K.SLGNPQF.R.I                            |
|    | AAF69828  |           | PGIP2: polygalacturonase inhibiting protein 2 | A. thaliana | 739 |   |    | 534.7590  | 1067.5034 | 1067.5036 | -0.0002 | 0 | (41) | 0.081   | 1 | K.SLGNPQF.R.I                            |
|    | AAF69828  |           | PGIP2: polygalacturonase inhibiting protein 2 | A. thaliana | 739 |   |    | 534.7592  | 1067.5038 | 1067.5036 | 0.0002  | 0 | (35) | 0.31    | 1 | K.SLGNPQF.R.I                            |
|    | AAF69828  |           | PGIP2: polygalacturonase inhibiting protein 2 | A. thaliana | 739 |   |    | 562.3138  | 1102.6130 | 1102.6135 | -0.0004 | 1 | (31) | 1.2     | 1 | R.IPKGEYQRF.F                            |
|    | AAF69828  |           | PGIP2: polygalacturonase inhibiting protein 2 | A. thaliana | 739 |   |    | 562.3144  | 1102.6142 | 1102.6135 | 0.0008  | 1 | 38   | 0.2     | 1 | R.IPKGEYQRF.F                            |
|    | AAF69828  |           | PGIP2: polygalacturonase inhibiting protein 2 | A. thaliana | 739 |   |    | 565.2705  | 1128.5264 | 1128.5274 | -0.0009 | 0 | (30) | 1.2     | 1 | R.MMFQDLSK.V                             |
|    | AAF69828  |           | PGIP2: polygalacturonase inhibiting protein 2 | A. thaliana | 739 |   |    | 565.5172  | 1129.0198 | 1128.5274 | 0.4925  | 0 | (29) | 1.5     | 1 | R.MMFQDLSK.V                             |
|    | AAF69828  |           | PGIP2: polygalacturonase inhibiting protein 2 | A. thaliana | 739 |   |    | 573.2680  | 1144.5214 | 1144.5223 | -0.0008 | 0 | (31) | 0.97    | 1 | R.MMFQDLSK.V + Oxidation (M)             |
|    | AAF69828  |           | PGIP2: polygalacturonase inhibiting protein 2 | A. thaliana | 739 |   |    | 573.2682  | 1144.5218 | 1144.5223 | -0.0004 | 0 | (30) | 1.1     | 1 | R.MMFQDLSK.V + Oxidation (M)             |
|    | AAF69828  |           | PGIP2: polygalacturonase inhibiting protein 2 | A. thaliana | 739 |   |    | 573.2683  | 1144.5220 | 1144.5223 | -0.0002 | 0 | (31) | 1       | 1 | R.MMFQDLSK.V + Oxidation (M)             |
|    | AAF69828  |           | PGIP2: polygalacturonase inhibiting protein 2 | A. thaliana | 739 |   |    | 573.2683  | 1144.5220 | 1144.5223 | -0.0002 | 0 | 39   | 0.15    | 1 | R.MMFQDLSK.V + Oxidation (M)             |
|    | AAF69828  |           | PGIP2: polygalacturonase inhibiting protein 2 | A. thaliana | 739 |   |    | 575.8264  | 1149.6382 | 1149.6393 | -0.0011 | 1 | (45) | 0.033   | 1 | R.KLEVLELSR.N                            |
|    | AAF69828  |           | PGIP2: polygalacturonase inhibiting protein 2 | A. thaliana | 739 |   |    | 575.8268  | 1149.6390 | 1149.6393 | -0.0003 | 1 | (35) | 0.34    | 1 | R.KLEVLELSR.N                            |
|    | AAF69828  |           | PGIP2: polygalacturonase inhibiting protein 2 | A. thaliana | 739 |   |    | 384.2203  | 1149.6391 | 1149.6393 | -0.0003 | 1 | (31) | 0.81    | 1 | R.KLEVLELSR.N                            |
|    | AAF69828  |           | PGIP2: polygalacturonase inhibiting protein 2 | A. thaliana | 739 |   |    | 575.8270  | 1149.6394 | 1149.6393 | 0.0001  | 1 | 45   | 0.033   | 1 | R.KLEVLELSR.N                            |
|    | AAF69828  |           | PGIP2: polygalacturonase inhibiting protein 2 | A. thaliana | 739 |   |    | 610.3387  | 1218.6628 | 1218.6608 | 0.0020  | 0 | (39) | 0.16    | 1 | K.LGGDASILFGAK.K                         |
|    | AAF69828  |           | PGIP2: polygalacturonase inhibiting protein 2 | A. thaliana | 739 |   |    | 610.5017  | 1218.9888 | 1218.9608 | 0.3280  | 0 | 46   | 0.032   | 1 | K.LGGDASILFGAK.K                         |
|    | AAF69828  |           | PGIP2: polygalacturonase inhibiting protein 2 | A. thaliana | 739 |   |    | 631.7878  | 1261.5610 | 1261.5617 | -0.0007 | 0 | (53) | 0.0059  | 1 | K.CLOGGAPLPSCK.-                         |
|    | AAF69828  |           | PGIP2: polygalacturonase inhibiting protein 2 | A. thaliana | 739 |   |    | 631.7879  | 1261.5612 | 1261.5617 | -0.0005 | 0 | 53   | 0.0055  | 1 | K.CLOGGAPLPSCK.-                         |
|    | AAF69828  |           | PGIP2: polygalacturonase inhibiting protein 2 | A. thaliana | 739 |   |    | 631.7880  | 1261.5614 | 1261.5617 | -0.0003 | 0 | (47) | 0.023   | 1 | K.CLOGGAPLPSCK.-                         |
|    | AAF69828  |           | PGIP2: polygalacturonase inhibiting protein 2 | A. thaliana | 739 |   |    | 631.7881  | 1261.5616 | 1261.5617 | -0.0001 | 0 | (50) | 0.012   | 1 | K.CLOGGAPLPSCK.-                         |
|    | AAF69828  |           | PGIP2: polygalacturonase inhibiting protein 2 | A. thaliana | 739 |   |    | 631.8317  | 1261.6488 | 1261.5617 | 0.0871  | 0 | (14) | 42      | 2 | K.CLOGGAPLPSCK.-                         |
|    | AAF69828  |           | PGIP2: polygalacturonase inhibiting protein 2 | A. thaliana | 739 |   |    | 646.2005  | 1290.5664 | 1290.5669 | -0.0005 | 0 | 49   | 0.17    | 1 | R.FDSVYFHNK.C                            |
|    | AAF69828  |           | PGIP2: polygalacturonase inhibiting protein 2 | A. thaliana | 739 |   |    | 769.3976  | 1536.7806 | 1536.7824 | -0.0018 | 0 | (56) | 0.0028  | 1 | K.LTGPPIPESGTFSGK.V                      |
|    | AAF69828  |           | PGIP2: polygalacturonase inhibiting protein 2 | A. thaliana | 739 |   |    | 769.3979  | 1536.7812 | 1536.7824 | -0.0012 | 0 | 63   | 0.00053 | 1 | K.LTGPPIPESGTFSGK.V                      |
|    | AAF69828  |           | PGIP2: polygalacturonase inhibiting protein 2 | A. thaliana | 739 |   |    | 769.3982  | 1536.7818 | 1536.7824 | -0.0006 | 0 | (53) | 0.0054  | 1 | K.LTGPPIPESGTFSGK.V                      |
|    | AAF69828  |           | PGIP2: polygalacturonase inhibiting protein 2 | A. thaliana | 739 |   |    | 919.5107  | 1837.0068 | 1837.0098 | -0.0029 | 0 | (56) | 0.0027  | 1 | K.VPSFLFHHNQLSGTIPK.S                    |
|    | AAF69828  |           | PGIP2: polygalacturonase inhibiting protein 2 | A. thaliana | 739 |   |    | 919.5110  | 1837.0074 | 1837.0098 | -0.0023 | 0 | 84   | 0.00039 | 1 | K.VPSFLFHHNQLSGTIPK.S                    |
|    | AAF69828  |           | PGIP2: polygalacturonase inhibiting protein 2 | A. thaliana | 739 |   |    | 613.3433  | 1837.0081 | 1837.0098 | -0.0017 | 0 | (41) | 0.074   | 1 | K.VPSFLFHHNQLSGTIPK.S                    |
|    | AAF69828  |           | PGIP2: polygalacturonase inhibiting protein 2 | A. thaliana | 739 |   |    | 613.3434  | 1837.0084 | 1837.0098 | -0.0014 | 0 | (39) | 0.13    | 1 | K.VPSFLFHHNQLSGTIPK.S                    |
|    | AAF69828  |           | PGIP2: polygalacturonase inhibiting protein 2 | A. thaliana | 739 |   |    | 613.3437  | 1837.0093 | 1837.0098 | -0.0005 | 0 | (38) | 0.17    | 1 | K.VPSFLFHHNQLSGTIPK.S                    |
|    | AAF69828  |           | PGIP2: polygalacturonase inhibiting protein 2 | A. thaliana | 739 |   |    | 810.0567  | 2427.1483 | 2427.1488 | -0.0006 | 0 | 42   | 0.046   | 1 | K.TLNNLDMNHNGITGSPAWEK.A + Oxidation (M) |
|    | AAF69828  |           | PGIP2: polygalacturonase inhibiting protein 2 | A. thaliana | 739 |   |    | 1314.1620 | 2626.3094 | 2626.3126 | -0.0031 | 0 | 100  | 5.3e-08 | 1 | K.NLEVIDLSFNDLSGIPSSLSLR.K               |
| 11 | CAA67362  | AT4G37520 | peroxidase ATP9a                              | A. thaliana | 134 | 3 | 11 | 568.2909  | 1134.5672 | 1134.5669 | 0.0003  | 0 | 20   | 12      | 1 | K.LPHPTDVK.N.L                           |
|    | CAA67362  |           | peroxidase ATP9a                              | A. thaliana | 134 |   |    | 615.8105  | 1229.6064 | 1229.6074 | -0.0010 | 0 | (69) | 0.00014 | 1 | R.VAINMDPTTPR.Q + Oxidation (M)          |
|    | CAA67362  |           | peroxidase ATP9a                              | A. thaliana | 134 |   |    | 615.8107  | 1229.6068 | 1229.6074 | -0.0006 | 0 | 77   | 2.5e-05 | 1 | R.VAINMDPTTPR.Q + Oxidation (M)          |
|    | CAA67362  |           | peroxidase ATP9a                              | A. thaliana | 134 |   |    | 631.7881  | 1261.5616 | 1261.6514 | -0.0897 | 0 | (34) | 0.43    | 2 | R.LDGLSSTAASVGGK.L                       |
|    | CAA67362  |           | peroxidase ATP9a                              | A. thaliana | 134 |   |    | 631.8317  | 1261.6488 | 1261.6514 | -0.0026 | 0 | 37   | 0.22    | 1 | R.LDGLSSTAASVGGK.L                       |
| 21 | NP_201217 | AT5G64120 | peroxidase, putative                          | A. thaliana | 524 | 8 | 29 | 344.7028  | 687.3910  | 687.3915  | -0.0005 | 0 | (35) | 0.54    | 1 | RAETIVR.N                                |
|    | NP_201217 |           | peroxidase, putative                          | A. thaliana | 524 |   |    | 344.7029  | 687.3912  | 687.3915  | -0.0003 | 0 | (34) | 0.7     | 1 | RAETIVR.N                                |
|    | NP_201217 |           | peroxidase, putative                          | A. thaliana | 524 |   |    | 344.7029  | 687.3912  | 687.3915  | -0.0003 | 0 | (37) | 0.37    | 1 | RAETIVR.N                                |
|    | NP_201217 |           | peroxidase, putative                          | A. thaliana | 524 |   |    | 344.7029  | 687.3912  | 687.3915  | -0.0003 | 0 | (31) | 1.5     | 4 | RAETIVR.N                                |
|    | NP_201217 |           | peroxidase, putative                          | A. thaliana | 524 |   |    | 344.7029  | 687.3912  | 687.3915  | -0.0003 | 0 | (36) | 0.53    | 1 | RAETIVR.N                                |
|    | NP_201217 |           | peroxidase, putative                          | A. thaliana | 524 |   |    | 344.7029  | 687.3912  | 687.3915  | -0.0003 | 0 | (39) | 0.26    | 1 | RAETIVR.N                                |
|    | NP_201217 |           | peroxidase, putative                          | A. thaliana | 524 |   |    | 344.7029  | 687.3912  | 687.3915  | -0.0003 | 0 | (32) | 1.1     | 1 | RAETIVR.N                                |
|    | NP_201217 |           | peroxidase, putative                          | A. thaliana | 524 |   |    | 344.7029  | 687.3912  | 687.3915  | -0.0003 | 0 | (37) | 0.37    | 1 | RAETIVR.N                                |
|    | NP_201217 |           | peroxidase, putative                          | A. thaliana | 524 |   |    | 344.7029  | 687.3912  | 687.3915  | -0.0003 | 0 | (36) | 0.43    | 1 | RAETIVR.N                                |
|    | NP_201217 |           | peroxidase, putative                          | A. thaliana | 524 |   |    | 344.7029  | 687.3912  | 687.3915  | -0.0003 | 0 | (32) | 1.1     | 1 | RAETIVR.N                                |
|    | NP_201217 |           | peroxidase, putative                          | A. thaliana | 524 |   |    | 344.7029  | 687.3912  | 687.3915  | -0.0003 | 0 | (39) | 0.26    | 1 | RAETIVR.N                                |
|    | NP_201217 |           | peroxidase, putative                          | A. thaliana | 524 |   |    | 344.7029  | 687.3912  | 687.3915  | -0.0003 | 0 | 39   | 0.26    | 1 | RAETIVR.N                                |
|    | NP_201217 |           | peroxidase, putative                          | A. thaliana | 524 |   |    | 344.7029  | 687.3912  | 687.3915  | -0.0003 | 0 | (39) | 0.26    | 1 | RAETIVR.N                                |
|    | NP_201217 |           | peroxidase, putative                          | A. thaliana | 524 |   |    | 344.7029  | 687.3912  | 687.3915  | -0.0003 | 0 | (38) | 0.26    | 1 | RAETIVR.N                                |
|    | NP_201217 |           | peroxidase, putative                          | A. thaliana | 524 |   |    | 344.7029  | 687.3912  | 687.3915  | -0.0003 | 0 | (36) | 0.52    | 1 | RAETIVR.N                                |
|    | NP_201217 |           | peroxidase, putative                          | A. thaliana | 524 |   |    | 344.7029  | 687.3912  | 687.3915  | -0.0003 | 0 | (33) | 0.96    | 1 | RAETIVR.N                                |
|    | NP_201217 |           | peroxidase, putative                          | A. thaliana | 524 |   |    | 344.7029  | 687.3912  | 687.3915  | -0.0003 | 0 | (34) | 0.69    | 1 | RAETIVR.N                                |
|    | NP_201217 |           | peroxidase, putative                          | A. thaliana | 524 |   |    | 344.7029  | 687.3912  | 687.3915  | -0.0003 | 0 | (38) | 0.27    | 1 | RAETIVR.N                                |
|    | NP_201217 |           | peroxidase, putative                          | A. thaliana | 524 |   |    | 344.7030  | 687.3914  | 687.3915  | -0.0001 | 0 | (24) | 6.8     | 1 | RAETIVR.N                                |
|    | NP_201217 |           | peroxidase, putative                          | A. thaliana | 524 |   |    | 370.2446  | 738.4746  | 738.4752  | -0.0005 | 0 | (21) | 7.9     | 2 | R.IAPGILR.M                              |
|    | NP_201217 |           | peroxidase, putative                          | A. thaliana | 524 |   |    | 370.2447  | 738.4748  | 738.4752  | -0.0003 | 0 | (25) | 2.8     | 2 | R.IAPGILR.M                              |
|    | NP_201217 |           | peroxidase, putative                          | A. thaliana | 524 |   |    | 370.2447  | 738.4748  | 738.4752  | -0.0003 | 0 | 25   | 2.7     | 2 | R.IAPGILR.M                              |
|    | NP_201217 |           | peroxidase, putative                          | A. thaliana | 524 |   |    | 370.2448  | 738.4750  | 738.4752  | -0.0001 | 0 | (22) | 6       | 6 | R.IAPGILR.M                              |
|    | NP_201217 |           | peroxidase, putative                          | A. thaliana | 524 |   |    |           |           |           |         |   |      |         |   |                                          |

|    |           |           |                                    |             |     |    |           |           |           |         |   |      |         |   |                                  |
|----|-----------|-----------|------------------------------------|-------------|-----|----|-----------|-----------|-----------|---------|---|------|---------|---|----------------------------------|
|    | NP_201217 |           | peroxidase, putative               | A. thaliana | 524 |    | 614.3130  | 1226.6114 | 1226.6118 | -0.0003 | 0 | (69) | 0.00014 | 1 | R.IGFYLTTCPR.A                   |
|    | NP_201217 |           | peroxidase, putative               | A. thaliana | 524 |    | 614.3131  | 1226.6116 | 1226.6118 | -0.0001 | 0 | (69) | 0.00014 | 1 | R.IGFYLTTCPR.A                   |
|    | NP_201217 |           | peroxidase, putative               | A. thaliana | 524 |    | 617.7933  | 1233.5720 | 1233.5738 | -0.0018 | 0 | (56) | 0.0028  | 1 | R.NAVNAGFSSDPR.I                 |
|    | NP_201217 |           | peroxidase, putative               | A. thaliana | 524 |    | 617.7938  | 1233.5730 | 1233.5738 | -0.0008 | 0 | 72   | 7e-05   | 1 | R.NAVNAGFSSDPR.I                 |
|    | NP_201217 |           | peroxidase, putative               | A. thaliana | 524 |    | 617.7939  | 1233.5732 | 1233.5738 | -0.0006 | 0 | (65) | 0.00037 | 1 | R.NAVNAGFSSDPR.I                 |
|    | NP_201217 |           | peroxidase, putative               | A. thaliana | 524 |    | 617.7939  | 1233.5732 | 1233.5738 | -0.0006 | 0 | (61) | 0.00083 | 1 | R.NAVNAGFSSDPR.I                 |
|    | NP_201217 |           | peroxidase, putative               | A. thaliana | 524 |    | 617.7940  | 1233.5734 | 1233.5738 | -0.0004 | 0 | (63) | 0.00064 | 1 | R.NAVNAGFSSDPR.I                 |
|    | NP_201217 |           | peroxidase, putative               | A. thaliana | 524 |    | 705.3779  | 1408.7412 | 1408.7422 | -0.0010 | 0 | 79   | 1.2e-05 | 1 | R.VLSASNANNLPGPR.D               |
|    | NP_201217 |           | peroxidase, putative               | A. thaliana | 524 |    | 705.3779  | 1408.7412 | 1408.7422 | -0.0010 | 0 | (78) | 1.7e-05 | 1 | R.VLSASNANNLPGPR.D               |
|    | NP_201217 |           | peroxidase, putative               | A. thaliana | 524 |    | 705.3783  | 1408.7420 | 1408.7422 | -0.0002 | 0 | (76) | 2.7e-05 | 1 | R.VLSASNANNLPGPR.D               |
|    | NP_201217 |           | peroxidase, putative               | A. thaliana | 524 |    | 950.9908  | 1899.9670 | 1899.9690 | -0.0020 | 0 | 71   | 6.9e-05 | 1 | R.TAGPNLNLQGFVIDNAK.T            |
|    | NP_201217 |           | peroxidase, putative               | A. thaliana | 524 |    | 1014.5370 | 2027.0594 | 2027.0623 | -0.0028 | 0 | 106  | 1.7e-08 | 1 | R.DLVLVLGGHTIGTAGGVFR.N          |
|    | NP_201217 |           | peroxidase, putative               | A. thaliana | 524 |    | 676.8956  | 2027.0650 | 2027.0623 | 0.0027  | 0 | (65) | 0.00021 | 1 | R.DLVLVLGGHTIGTAGGVFR.N          |
| 22 | NP_188048 | AT3G14310 | ATPME3; pectin methyltransferase 3 | A. thaliana | 865 | 16 | 374.2214  | 746.4282  | 746.4286  | -0.0004 | 0 | (58) | 2.7     | 1 | R.TIITGSR.N                      |
|    | NP_188048 |           | ATPME3; pectin methyltransferase 3 | A. thaliana | 865 |    | 374.2214  | 746.4282  | 746.4286  | -0.0004 | 0 | 34   | 0.59    | 1 | R.TIITGSR.N                      |
|    | NP_188048 |           | ATPME3; pectin methyltransferase 3 | A. thaliana | 865 |    | 374.2215  | 746.4284  | 746.4286  | -0.0002 | 0 | (23) | 7.9     | 2 | R.TIITGSR.N                      |
|    | NP_188048 |           | ATPME3; pectin methyltransferase 3 | A. thaliana | 865 |    | 386.7392  | 771.4638  | 771.4643  | -0.0004 | 0 | (26) | 4       | 1 | R.VYVHKA                         |
|    | NP_188048 |           | ATPME3; pectin methyltransferase 3 | A. thaliana | 865 |    | 386.7393  | 771.4640  | 771.4643  | -0.0002 | 0 | 33   | 0.72    | 1 | R.VYVHKA                         |
|    | NP_188048 |           | ATPME3; pectin methyltransferase 3 | A. thaliana | 865 |    | 386.7394  | 771.4642  | 771.4643  | -0.0000 | 0 | (18) | 24      | 2 | R.VYVHKA                         |
|    | NP_188048 |           | ATPME3; pectin methyltransferase 3 | A. thaliana | 865 |    | 386.7394  | 771.4642  | 771.4643  | -0.0000 | 0 | (16) | 40      | 1 | R.VYVHKA                         |
|    | NP_188048 |           | ATPME3; pectin methyltransferase 3 | A. thaliana | 865 |    | 394.7105  | 787.4076  | 787.4076  | -0.0011 | 0 | (29) | 2.2     | 1 | R.ENVEVAK.K                      |
|    | NP_188048 |           | ATPME3; pectin methyltransferase 3 | A. thaliana | 865 |    | 394.7109  | 787.4072  | 787.4076  | -0.0003 | 0 | 38   | 0.3     | 1 | R.ENVEVAK.K                      |
|    | NP_188048 |           | ATPME3; pectin methyltransferase 3 | A. thaliana | 865 |    | 394.7109  | 787.4072  | 787.4076  | -0.0003 | 0 | (23) | 9.1     | 1 | R.ENVEVAK.K                      |
|    | NP_188048 |           | ATPME3; pectin methyltransferase 3 | A. thaliana | 865 |    | 394.7111  | 787.4076  | 787.4076  | 0.0001  | 0 | (29) | 2.3     | 1 | R.ENVEVAK.K                      |
|    | NP_188048 |           | ATPME3; pectin methyltransferase 3 | A. thaliana | 865 |    | 394.7111  | 787.4076  | 787.4076  | 0.0001  | 0 | (27) | 3.7     | 1 | R.ENVEVAK.K                      |
|    | NP_188048 |           | ATPME3; pectin methyltransferase 3 | A. thaliana | 865 |    | 397.7349  | 793.4552  | 793.4559  | -0.0006 | 0 | (27) | 2.9     | 1 | K.HQAVLR.V                       |
|    | NP_188048 |           | ATPME3; pectin methyltransferase 3 | A. thaliana | 865 |    | 397.7350  | 793.4554  | 793.4559  | -0.0004 | 0 | (35) | 0.49    | 1 | K.HQAVLR.V                       |
|    | NP_188048 |           | ATPME3; pectin methyltransferase 3 | A. thaliana | 865 |    | 397.7350  | 793.4554  | 793.4559  | -0.0004 | 0 | 40   | 0.15    | 1 | K.HQAVLR.V                       |
|    | NP_188048 |           | ATPME3; pectin methyltransferase 3 | A. thaliana | 865 |    | 397.7350  | 793.4554  | 793.4559  | -0.0004 | 0 | (36) | 0.4     | 1 | K.HQAVLR.V                       |
|    | NP_188048 |           | ATPME3; pectin methyltransferase 3 | A. thaliana | 865 |    | 397.7351  | 793.4556  | 793.4559  | -0.0002 | 0 | (38) | 0.23    | 1 | K.HQAVLR.V                       |
|    | NP_188048 |           | ATPME3; pectin methyltransferase 3 | A. thaliana | 865 |    | 438.7208  | 875.4270  | 875.4283  | -0.0013 | 0 | (29) | 1.9     | 1 | K.NMVTAGQR.T                     |
|    | NP_188048 |           | ATPME3; pectin methyltransferase 3 | A. thaliana | 865 |    | 438.7212  | 875.4278  | 875.4283  | -0.0005 | 0 | (31) | 1.3     | 1 | K.NMVTAGQR.T                     |
|    | NP_188048 |           | ATPME3; pectin methyltransferase 3 | A. thaliana | 865 |    | 438.7214  | 875.4282  | 875.4283  | -0.0001 | 0 | 33   | 0.9     | 1 | K.NMVTAGQR.T                     |
|    | NP_188048 |           | ATPME3; pectin methyltransferase 3 | A. thaliana | 865 |    | 501.2846  | 1000.5546 | 1000.5553 | -0.0006 | 0 | 72   | 7.1e-05 | 1 | K.VITAAEAQK.Y                    |
|    | NP_188048 |           | ATPME3; pectin methyltransferase 3 | A. thaliana | 865 |    | 501.2847  | 1000.5548 | 1000.5553 | -0.0004 | 0 | (67) | 0.00026 | 1 | K.VITAAEAQK.Y                    |
|    | NP_188048 |           | ATPME3; pectin methyltransferase 3 | A. thaliana | 865 |    | 501.2847  | 1000.5548 | 1000.5553 | -0.0004 | 0 | (67) | 0.00026 | 1 | K.VITAAEAQK.Y                    |
|    | NP_188048 |           | ATPME3; pectin methyltransferase 3 | A. thaliana | 865 |    | 501.2849  | 1000.5552 | 1000.5553 | -0.0000 | 0 | (62) | 0.00078 | 1 | K.VITAAEAQK.Y                    |
|    | NP_188048 |           | ATPME3; pectin methyltransferase 3 | A. thaliana | 865 |    | 536.7308  | 1071.4470 | 1071.4478 | -0.0007 | 0 | (28) | 2.1     | 1 | K.NIIMFGDGR.T + 2 Oxidation (M)  |
|    | NP_188048 |           | ATPME3; pectin methyltransferase 3 | A. thaliana | 865 |    | 536.7310  | 1071.4474 | 1071.4478 | -0.0003 | 0 | (36) | 0.29    | 1 | K.NIIMFGDGR.T + 2 Oxidation (M)  |
|    | NP_188048 |           | ATPME3; pectin methyltransferase 3 | A. thaliana | 865 |    | 536.7310  | 1071.4474 | 1071.4478 | -0.0003 | 0 | (39) | 0.14    | 1 | K.NIIMFGDGR.T + 2 Oxidation (M)  |
|    | NP_188048 |           | ATPME3; pectin methyltransferase 3 | A. thaliana | 865 |    | 536.7310  | 1071.4474 | 1071.4478 | -0.0003 | 0 | 40   | 0.12    | 1 | K.NIIMFGDGR.T + 2 Oxidation (M)  |
|    | NP_188048 |           | ATPME3; pectin methyltransferase 3 | A. thaliana | 865 |    | 559.8058  | 1117.5970 | 1117.5979 | -0.0009 | 0 | (70) | 0.00014 | 1 | R.IGATSDLSQV.G                   |
|    | NP_188048 |           | ATPME3; pectin methyltransferase 3 | A. thaliana | 865 |    | 559.8059  | 1117.5972 | 1117.5979 | -0.0007 | 0 | (69) | 0.00015 | 1 | R.IGATSDLSQV.G                   |
|    | NP_188048 |           | ATPME3; pectin methyltransferase 3 | A. thaliana | 865 |    | 559.8060  | 1117.5974 | 1117.5979 | -0.0005 | 0 | (70) | 0.00014 | 1 | R.IGATSDLSQV.G                   |
|    | NP_188048 |           | ATPME3; pectin methyltransferase 3 | A. thaliana | 865 |    | 559.8062  | 1117.5978 | 1117.5979 | -0.0001 | 0 | (46) | 0.036   | 1 | R.IGATSDLSQV.G                   |
|    | NP_188048 |           | ATPME3; pectin methyltransferase 3 | A. thaliana | 865 |    | 559.8062  | 1117.5978 | 1117.5979 | -0.0001 | 0 | (51) | 0.0095  | 1 | R.IGATSDLSQV.G                   |
|    | NP_188048 |           | ATPME3; pectin methyltransferase 3 | A. thaliana | 865 |    | 559.8062  | 1117.5978 | 1117.5979 | -0.0001 | 0 | 72   | 7.8e-05 | 1 | R.IGATSDLSQV.G                   |
|    | NP_188048 |           | ATPME3; pectin methyltransferase 3 | A. thaliana | 865 |    | 600.7790  | 1199.5414 | 1199.5427 | -0.0013 | 1 | 24   | 5       | 1 | K.KNIMFMGDGR.T + 2 Oxidation (M) |
|    | NP_188048 |           | ATPME3; pectin methyltransferase 3 | A. thaliana | 865 |    | 639.8192  | 1277.6238 | 1277.6252 | -0.0013 | 0 | (60) | 0.012   | 1 | R.DITFQNTAGPSK.H                 |
|    | NP_188048 |           | ATPME3; pectin methyltransferase 3 | A. thaliana | 865 |    | 639.8192  | 1277.6238 | 1277.6252 | -0.0013 | 0 | (58) | 0.0021  | 1 | R.DITFQNTAGPSK.H                 |
|    | NP_188048 |           | ATPME3; pectin methyltransferase 3 | A. thaliana | 865 |    | 639.8196  | 1277.6246 | 1277.6252 | -0.0005 | 0 | 64   | 0.00044 | 1 | R.DITFQNTAGPSK.H                 |
|    | NP_188048 |           | ATPME3; pectin methyltransferase 3 | A. thaliana | 865 |    | 639.8198  | 1277.6250 | 1277.6252 | -0.0001 | 0 | (51) | 0.0098  | 1 | R.DITFQNTAGPSK.H                 |
|    | NP_188048 |           | ATPME3; pectin methyltransferase 3 | A. thaliana | 865 |    | 639.8199  | 1277.6252 | 1277.6252 | 0.0001  | 0 | (49) | 0.015   | 1 | R.DITFQNTAGPSK.H                 |
|    | NP_188048 |           | ATPME3; pectin methyltransferase 3 | A. thaliana | 865 |    | 655.8139  | 1309.6132 | 1309.6150 | -0.0018 | 0 | (58) | 0.0018  | 1 | K.KADATVAADGSGTFK.T              |
|    | NP_188048 |           | ATPME3; pectin methyltransferase 3 | A. thaliana | 865 |    | 655.8141  | 1309.6136 | 1309.6150 | -0.0014 | 0 | (63) | 0.00065 | 1 | K.KADATVAADGSGTFK.T              |
|    | NP_188048 |           | ATPME3; pectin methyltransferase 3 | A. thaliana | 865 |    | 655.8145  | 1309.6144 | 1309.6150 | -0.0006 | 0 | (62) | 0.00074 | 1 | K.KADATVAADGSGTFK.T              |
|    | NP_188048 |           | ATPME3; pectin methyltransferase 3 | A. thaliana | 865 |    | 655.8147  | 1309.6148 | 1309.6150 | -0.0002 | 0 | 65   | 0.00037 | 1 | K.KADATVAADGSGTFK.T              |
|    | NP_188048 |           | ATPME3; pectin methyltransferase 3 | A. thaliana | 865 |    | 655.8148  | 1309.6150 | 1309.6150 | 0.0000  | 0 | (44) | 0.047   | 1 | K.KADATVAADGSGTFK.T              |
|    | NP_188048 |           | ATPME3; pectin methyltransferase 3 | A. thaliana | 865 |    | 655.8149  | 1309.6152 | 1309.6150 | 0.0002  | 0 | (41) | 0.094   | 1 | K.KADATVAADGSGTFK.T              |
|    | NP_188048 |           | ATPME3; pectin methyltransferase 3 | A. thaliana | 865 |    | 655.8157  | 1309.6168 | 1309.6150 | 0.0018  | 0 | (24) | 4.5     | 1 | K.KADATVAADGSGTFK.T              |
|    | NP_188048 |           | ATPME3; pectin methyltransferase 3 | A. thaliana | 865 |    | 684.8101  | 1367.6056 | 1367.6066 | -0.0009 | 0 | (56) | 0.0027  | 1 | R.EYSNTGAGGATANKR.V              |
|    | NP_188048 |           | ATPME3; pectin methyltransferase 3 | A. thaliana | 865 |    | 684.8102  | 1367.6058 | 1367.6066 | -0.0007 | 0 | (52) | 0.0058  | 1 | R.EYSNTGAGGATANKR.V              |
|    | NP_188048 |           | ATPME3; pectin methyltransferase 3 | A. thaliana | 865 |    | 684.8103  | 1367.6060 | 1367.6066 | -0.0005 | 0 | (56) | 0.0025  | 1 | R.EYSNTGAGGATANKR.V              |
|    | NP_188048 |           | ATPME3; pectin methyltransferase 3 | A. thaliana | 865 |    | 684.8103  | 1367.6060 | 1367.6066 | -0.0005 | 0 | 63   | 0.00047 | 1 | R.EYSNTGAGGATANKR.V              |
|    | NP_188048 |           | ATPME3; pectin methyltransferase 3 | A. thaliana | 865 |    | 707.3697  | 1412.7248 | 1412.7259 | -0.0011 | 0 | (55) | 0.0038  | 1 | K.TVAAWAAPENSINKR.Y              |
|    | NP_188048 |           | ATPME3; pectin methyltransferase 3 | A. thaliana | 865 |    | 707.3698  | 1412.7250 | 1412.7259 | -0.0009 | 0 | (69) | 0.00015 | 1 | K.TVAAWAAPENSINKR.Y              |
|    | NP_188048 |           | ATPME3; pectin methyltransferase 3 | A. thaliana | 865 |    | 707.3704  | 1412.7262 | 1412.7259 | 0.0003  | 0 | 71   | 0.0001  | 1 | K.TVAAWAAPENSINKR.Y              |
|    | NP_188048 |           | ATPME3; pectin methyltransferase 3 | A. thaliana | 865 |    | 714.3774  | 1426.7402 | 1426.7416 | -0.0014 | 0 | (51) | 0.0087  | 1 | R.TDPNQNTGIVQK.C                 |
|    | NP_188048 |           | ATPME3; pectin methyltransferase 3 | A. thaliana | 865 |    | 714.3776  | 1426.7406 | 1426.7416 | -0.0010 | 0 | 54   | 0.0044  | 1 | R.TDPNQNTGIVQK.C                 |
|    | NP_188048 |           | ATPME3; pectin methyltransferase 3 | A. thaliana | 865 |    | 785.4200  | 1568.8254 | 1568.8270 | -0.0016 | 1 | 60   | 0.00098 | 1 | K.TVAAWAAPENSINKR.Y              |
|    | NP_188048 |           | ATPME3; pectin methyltransferase 3 | A. thaliana | 865 |    | 785.4201  | 1568.8256 | 1568.8270 | -0.0014 | 1 | (52) | 0.0058  | 1 | K.TVAAWAAPENSINKR.Y              |
|    | NP_188048 |           | ATPME3; pectin methyltransferase 3 | A. thaliana | 865 |    | 785.4202  | 1568.8258 | 1568.8270 | -0.0012 | 1 | (49) | 0.012   | 1 | K.TVAAWAAPENSINKR.Y              |
|    | NP_188048 |           | ATPME3; pectin methyltransferase 3 | A. thaliana | 865 |    | 785.4203  | 1568.8260 | 1568.8270 | -0.0010 | 1 | (52) | 0.0054  | 1 | K.TVAAWAAPENSINKR.Y              |
|    | NP_188048 |           | ATPME3; pectin methyltransferase 3 | A. thaliana | 865 |    | 523.9493  | 1568.8261 | 1568.8270 | -0.0010 | 1 | (42) | 0.059   | 1 | K.TVAAWAAPENSINKR.Y              |
|    | NP_188048 |           | ATPME3; pectin methyltransferase 3 | A. thaliana | 865 |    | 523.9493  | 1568.8261 | 1568.8270 | -0.0010 | 1 | (46) | 0.025   | 1 | K.TVAAWAAPENSINKR.Y              |
|    | NP_188048 |           | ATPME3; pectin methyltransferase 3 | A. thaliana | 865 |    | 523.9494  | 1568.8264 | 1568.8270 | -0.0007 | 1 | (44) | 0.035   | 1 | K.TVAAWAAPENSINKR.Y              |
|    | NP_188048 |           | ATPME3; pectin methyltransferase 3 | A. thaliana | 865 |    | 523.9495  | 1568.8267 | 1568.8270 | -0.0004 | 1 | (35) | 0.28    | 1 | K.TVAAWAAPENSINKR.Y              |
|    | NP_188048 |           | ATPME3; pectin methyltransferase 3 | A. thaliana | 865 |    | 1009.5000 | 2016.9854 | 2016.9865 | -0.0011 | 0 | 102  | 4.5e-08 | 2 | R.NVVDGSTTFHSATVAAGVRF.F         |
|    | NP_1880   |           |                                    |             |     |    |           |           |           |         |   |      |         |   |                                  |

|    |           |           |                                                |             |     |    |    |           |           |           |         |   |      |         |   |                                 |
|----|-----------|-----------|------------------------------------------------|-------------|-----|----|----|-----------|-----------|-----------|---------|---|------|---------|---|---------------------------------|
|    | NP_190182 |           | ATEXL3 (EXPANSIN-LIKE A3)                      | A. thaliana | 543 |    |    | 419.1995  | 836.3844  | 836.3851  | -0.0006 | 0 | (26) | 2.8     | 1 | R.VPCNYGKR                      |
|    | NP_190182 |           | ATEXL3 (EXPANSIN-LIKE A3)                      | A. thaliana | 543 |    |    | 419.1996  | 836.3846  | 836.3851  | -0.0004 | 0 | (21) | 8.6     | 1 | R.VPCNYGKR                      |
|    | NP_190182 |           | ATEXL3 (EXPANSIN-LIKE A3)                      | A. thaliana | 543 |    |    | 419.1996  | 836.3846  | 836.3851  | -0.0004 | 0 | 31   | 0.87    | 1 | R.VPCNYGKR                      |
|    | NP_190182 |           | ATEXL3 (EXPANSIN-LIKE A3)                      | A. thaliana | 543 |    |    | 419.1996  | 836.3846  | 836.3851  | -0.0004 | 0 | (25) | 3.6     | 1 | R.VPCNYGKR                      |
|    | NP_190182 |           | ATEXL3 (EXPANSIN-LIKE A3)                      | A. thaliana | 543 |    |    | 419.1996  | 836.3846  | 836.3851  | -0.0004 | 0 | (29) | 1.4     | 1 | R.VPCNYGKR                      |
|    | NP_190182 |           | ATEXL3 (EXPANSIN-LIKE A3)                      | A. thaliana | 543 |    |    | 419.1996  | 836.3846  | 836.3851  | -0.0004 | 0 | (25) | 4.1     | 1 | R.VPCNYGKR                      |
|    | NP_190182 |           | ATEXL3 (EXPANSIN-LIKE A3)                      | A. thaliana | 543 |    |    | 419.1996  | 836.3846  | 836.3851  | -0.0004 | 0 | (24) | 4.3     | 1 | R.VPCNYGKR                      |
|    | NP_190182 |           | ATEXL3 (EXPANSIN-LIKE A3)                      | A. thaliana | 543 |    |    | 419.1997  | 836.3848  | 836.3851  | -0.0002 | 0 | (23) | 5.7     | 1 | R.VPCNYGKR                      |
|    | NP_190182 |           | ATEXL3 (EXPANSIN-LIKE A3)                      | A. thaliana | 543 |    |    | 473.7891  | 945.5636  | 945.5647  | -0.0011 | 0 | 39   | 0.22    | 1 | K.KPNYLAIK.L                    |
|    | NP_190182 |           | ATEXL3 (EXPANSIN-LIKE A3)                      | A. thaliana | 543 |    |    | 473.7895  | 945.5644  | 945.5647  | -0.0003 | 0 | (28) | 3.3     | 1 | K.KPNYLAIK.L                    |
|    | NP_190182 |           | ATEXL3 (EXPANSIN-LIKE A3)                      | A. thaliana | 543 |    |    | 480.7786  | 959.5426  | 959.5440  | -0.0014 | 0 | (43) | 0.066   | 1 | K.VPTGALQKF.F                   |
|    | NP_190182 |           | ATEXL3 (EXPANSIN-LIKE A3)                      | A. thaliana | 543 |    |    | 480.7792  | 959.5438  | 959.5440  | -0.0002 | 0 | 45   | 0.043   | 1 | K.VPTGALQKF.F                   |
|    | NP_190182 |           | ATEXL3 (EXPANSIN-LIKE A3)                      | A. thaliana | 543 |    |    | 480.7792  | 959.5438  | 959.5440  | -0.0002 | 0 | (43) | 0.071   | 1 | K.VPTGALQKF.F                   |
|    | NP_190182 |           | ATEXL3 (EXPANSIN-LIKE A3)                      | A. thaliana | 543 |    |    | 497.2500  | 992.4854  | 992.4862  | -0.0007 | 1 | 28   | 2       | 2 | R.VPCNYGKR.N                    |
|    | NP_190182 |           | ATEXL3 (EXPANSIN-LIKE A3)                      | A. thaliana | 543 |    |    | 522.7525  | 1043.4904 | 1043.4924 | -0.0020 | 0 | (39) | 0.18    | 1 | K.FTVTGGYDQK.T                  |
|    | NP_190182 |           | ATEXL3 (EXPANSIN-LIKE A3)                      | A. thaliana | 543 |    |    | 522.7526  | 1043.4906 | 1043.4924 | -0.0018 | 0 | 41   | 0.1     | 1 | K.FTVTGGYDQK.T                  |
|    | NP_190182 |           | ATEXL3 (EXPANSIN-LIKE A3)                      | A. thaliana | 543 |    |    | 536.2640  | 1070.5134 | 1070.5145 | -0.0011 | 0 | 31   | 1.1     | 1 | R.SHGAWATDK.V                   |
|    | NP_190182 |           | ATEXL3 (EXPANSIN-LIKE A3)                      | A. thaliana | 543 |    |    | 536.2645  | 1070.5144 | 1070.5145 | -0.0001 | 0 | (19) | 15      | 1 | R.SHGAWATDK.V                   |
|    | NP_190182 |           | ATEXL3 (EXPANSIN-LIKE A3)                      | A. thaliana | 543 |    |    | 536.2645  | 1070.5144 | 1070.5145 | -0.0001 | 0 | (30) | 1.3     | 1 | R.SHGAWATDK.V                   |
|    | NP_190182 |           | ATEXL3 (EXPANSIN-LIKE A3)                      | A. thaliana | 543 |    |    | 536.2645  | 1070.5144 | 1070.5145 | -0.0001 | 0 | (28) | 2       | 1 | R.SHGAWATDK.V                   |
|    | NP_190182 |           | ATEXL3 (EXPANSIN-LIKE A3)                      | A. thaliana | 543 |    |    | 557.2931  | 1112.5716 | 1112.5727 | -0.0010 | 0 | (48) | 0.019   | 1 | R.VLPANWNSGR.I                  |
|    | NP_190182 |           | ATEXL3 (EXPANSIN-LIKE A3)                      | A. thaliana | 543 |    |    | 557.2936  | 1112.5726 | 1112.5727 | -0.0000 | 0 | 52   | 0.0076  | 1 | R.VLPANWNSGR.I                  |
|    | NP_190182 |           | ATEXL3 (EXPANSIN-LIKE A3)                      | A. thaliana | 543 |    |    | 557.8181  | 1113.6216 | 1113.6216 | 0.0000  | 0 | (21) | 10      | 2 | R.AMAKPVVGDYK.Y                 |
|    | NP_190182 |           | ATEXL3 (EXPANSIN-LIKE A3)                      | A. thaliana | 543 |    |    | 565.8020  | 1129.5894 | 1129.6165 | -0.0271 | 0 | (22) | 7.2     | 4 | R.AMAKPVVGDYK.Y + Oxidation (M) |
|    | NP_190182 |           | ATEXL3 (EXPANSIN-LIKE A3)                      | A. thaliana | 543 |    |    | 377.5458  | 1129.6156 | 1129.6165 | -0.0010 | 0 | (36) | 0.32    | 2 | R.AMAKPVVGDYK.Y + Oxidation (M) |
|    | NP_190182 |           | ATEXL3 (EXPANSIN-LIKE A3)                      | A. thaliana | 543 |    |    | 565.8152  | 1129.6158 | 1129.6165 | -0.0007 | 0 | (24) | 5.3     | 1 | R.AMAKPVVGDYK.Y + Oxidation (M) |
|    | NP_190182 |           | ATEXL3 (EXPANSIN-LIKE A3)                      | A. thaliana | 543 |    |    | 565.8152  | 1129.6158 | 1129.6165 | -0.0007 | 0 | (30) | 1.3     | 2 | R.AMAKPVVGDYK.Y + Oxidation (M) |
|    | NP_190182 |           | ATEXL3 (EXPANSIN-LIKE A3)                      | A. thaliana | 543 |    |    | 565.8152  | 1129.6158 | 1129.6165 | -0.0007 | 0 | (44) | 0.047   | 1 | R.AMAKPVVGDYK.Y + Oxidation (M) |
|    | NP_190182 |           | ATEXL3 (EXPANSIN-LIKE A3)                      | A. thaliana | 543 |    |    | 377.5460  | 1129.6162 | 1129.6165 | -0.0004 | 0 | (30) | 1.3     | 1 | R.AMAKPVVGDYK.Y + Oxidation (M) |
|    | NP_190182 |           | ATEXL3 (EXPANSIN-LIKE A3)                      | A. thaliana | 543 |    |    | 565.8154  | 1129.6162 | 1129.6165 | -0.0003 | 0 | 47   | 0.023   | 2 | R.AMAKPVVGDYK.Y + Oxidation (M) |
|    | NP_190182 |           | ATEXL3 (EXPANSIN-LIKE A3)                      | A. thaliana | 543 |    |    | 377.5461  | 1129.6165 | 1129.6165 | -0.0001 | 0 | (36) | 0.35    | 2 | R.AMAKPVVGDYK.Y + Oxidation (M) |
|    | NP_190182 |           | ATEXL3 (EXPANSIN-LIKE A3)                      | A. thaliana | 543 |    |    | 603.8087  | 1205.6028 | 1205.6040 | -0.0012 | 0 | 78   | 1.7e-05 | 1 | K.OGVVDEYQVR.V                  |
|    | NP_190182 |           | ATEXL3 (EXPANSIN-LIKE A3)                      | A. thaliana | 543 |    |    | 603.8091  | 1205.6036 | 1205.6040 | -0.0004 | 0 | (66) | 0.0032  | 1 | K.OGVVDEYQVR.V                  |
|    | NP_190182 |           | ATEXL3 (EXPANSIN-LIKE A3)                      | A. thaliana | 543 |    |    | 603.8091  | 1205.6036 | 1205.6040 | -0.0004 | 0 | (63) | 0.00055 | 1 | K.OGVVDEYQVR.V                  |
|    | NP_190182 |           | ATEXL3 (EXPANSIN-LIKE A3)                      | A. thaliana | 543 |    |    | 649.2730  | 1296.5314 | 1296.5340 | -0.0025 | 0 | 55   | 0.0029  | 1 | K.DGAGCGACFOVR.C                |
|    | NP_190182 |           | ATEXL3 (EXPANSIN-LIKE A3)                      | A. thaliana | 543 |    |    | 649.2738  | 1296.5330 | 1296.5340 | -0.0009 | 0 | (52) | 0.0058  | 1 | K.DGAGCGACFOVR.C                |
|    | NP_190182 |           | ATEXL3 (EXPANSIN-LIKE A3)                      | A. thaliana | 543 |    |    | 671.8888  | 2012.0446 | 2012.0480 | -0.0034 | 1 | (42) | 0.045   | 1 | R.SHGAWATDKVPTGALQKF.F          |
|    | NP_190182 |           | ATEXL3 (EXPANSIN-LIKE A3)                      | A. thaliana | 543 |    |    | 1007.0300 | 2012.0454 | 2012.0480 | -0.0025 | 1 | (78) | 1.3e-05 | 1 | R.SHGAWATDKVPTGALQKF.F          |
|    | NP_190182 |           | ATEXL3 (EXPANSIN-LIKE A3)                      | A. thaliana | 543 |    |    | 504.0197  | 2012.0457 | 2012.0480 | 0.0023  | 1 | (12) | 49      | 6 | R.SHGAWATDKVPTGALQKF.F          |
|    | NP_190182 |           | ATEXL3 (EXPANSIN-LIKE A3)                      | A. thaliana | 543 |    |    | 671.8893  | 2012.0461 | 2012.0480 | -0.0019 | 1 | (63) | 0.00334 | 1 | R.SHGAWATDKVPTGALQKF.F          |
|    | NP_190182 |           | ATEXL3 (EXPANSIN-LIKE A3)                      | A. thaliana | 543 |    |    | 1007.0310 | 2012.0474 | 2012.0480 | -0.0005 | 1 | 83   | 3.7e-06 | 1 | R.SHGAWATDKVPTGALQKF.F          |
|    | NP_190182 |           | ATEXL3 (EXPANSIN-LIKE A3)                      | A. thaliana | 543 |    |    | 671.8898  | 2012.0476 | 2012.0480 | -0.0004 | 1 | (47) | 0.013   | 1 | R.SHGAWATDKVPTGALQKF.F          |
| 19 | NP_195553 | AT4G38400 | ATEXL2 (ARABIDOPSIS THALIANA EXPANSIN-LIKE A2) | A. thaliana | 505 | 12 | 36 | 453.7211  | 905.4276  | 905.4277  | -0.0000 | 0 | 29   | 1.6     | 1 | K.NPTLCSK.G                     |
|    | NP_195553 |           | ATEXL2 (ARABIDOPSIS THALIANA EXPANSIN-LIKE A2) | A. thaliana | 505 |    |    | 466.7638  | 931.5126  | 931.5127  | -0.0000 | 0 | (36) | 0.35    | 1 | K.NPNYLAIK.L                    |
|    | NP_195553 |           | ATEXL2 (ARABIDOPSIS THALIANA EXPANSIN-LIKE A2) | A. thaliana | 505 |    |    | 466.7638  | 931.5130  | 931.5127  | 0.0004  | 0 | 40   | 0.14    | 1 | K.NPNYLAIK.L                    |
|    | NP_195553 |           | ATEXL2 (ARABIDOPSIS THALIANA EXPANSIN-LIKE A2) | A. thaliana | 505 |    |    | 476.7129  | 951.4112  | 951.4120  | -0.0008 | 0 | (28) | 1.9     | 1 | R.VPCDYGNK.K                    |
|    | NP_195553 |           | ATEXL2 (ARABIDOPSIS THALIANA EXPANSIN-LIKE A2) | A. thaliana | 505 |    |    | 476.7130  | 951.4114  | 951.4120  | -0.0006 | 0 | 35   | 0.39    | 1 | R.VPCDYGNK.K                    |
|    | NP_195553 |           | ATEXL2 (ARABIDOPSIS THALIANA EXPANSIN-LIKE A2) | A. thaliana | 505 |    |    | 528.7712  | 1055.5278 | 1055.5288 | -0.0009 | 0 | (33) | 0.63    | 1 | R.FVVATYDQK.M                   |
|    | NP_195553 |           | ATEXL2 (ARABIDOPSIS THALIANA EXPANSIN-LIKE A2) | A. thaliana | 505 |    |    | 528.7714  | 1055.5282 | 1055.5288 | -0.0005 | 0 | (32) | 0.77    | 1 | R.FVVATYDQK.M                   |
|    | NP_195553 |           | ATEXL2 (ARABIDOPSIS THALIANA EXPANSIN-LIKE A2) | A. thaliana | 505 |    |    | 528.7714  | 1055.5282 | 1055.5288 | -0.0005 | 0 | 36   | 0.29    | 1 | R.FVVATYDQK.M                   |
|    | NP_195553 |           | ATEXL2 (ARABIDOPSIS THALIANA EXPANSIN-LIKE A2) | A. thaliana | 505 |    |    | 528.7717  | 1055.5288 | 1055.5288 | 0.0001  | 0 | (33) | 0.64    | 1 | R.FVVATYDQK.M                   |
|    | NP_195553 |           | ATEXL2 (ARABIDOPSIS THALIANA EXPANSIN-LIKE A2) | A. thaliana | 505 |    |    | 540.7607  | 1079.5068 | 1079.5070 | -0.0001 | 1 | (15) | 45      | 2 | R.VPCDYGNK.K                    |
|    | NP_195553 |           | ATEXL2 (ARABIDOPSIS THALIANA EXPANSIN-LIKE A2) | A. thaliana | 505 |    |    | 540.7607  | 1079.5068 | 1079.5070 | -0.0001 | 1 | 49   | 0.016   | 1 | R.VPCDYGNK.K                    |
|    | NP_195553 |           | ATEXL2 (ARABIDOPSIS THALIANA EXPANSIN-LIKE A2) | A. thaliana | 505 |    |    | 540.7608  | 1079.5070 | 1079.5070 | 0.0001  | 1 | (33) | 0.65    | 1 | R.VPCDYGNK.K                    |
|    | NP_195553 |           | ATEXL2 (ARABIDOPSIS THALIANA EXPANSIN-LIKE A2) | A. thaliana | 505 |    |    | 540.7608  | 1079.5070 | 1079.5070 | 0.0001  | 1 | (35) | 0.43    | 1 | R.VPCDYGNK.K                    |
|    | NP_195553 |           | ATEXL2 (ARABIDOPSIS THALIANA EXPANSIN-LIKE A2) | A. thaliana | 505 |    |    | 360.8431  | 1079.5075 | 1079.5070 | 0.0005  | 1 | (22) | 8.6     | 1 | R.VPCDYGNK.K                    |
|    | NP_195553 |           | ATEXL2 (ARABIDOPSIS THALIANA EXPANSIN-LIKE A2) | A. thaliana | 505 |    |    | 542.7933  | 1083.5720 | 1083.5713 | 0.0008  | 0 | 25   | 3.2     | 1 | R.VLPANWEAG.S                   |
|    | NP_195553 |           | ATEXL2 (ARABIDOPSIS THALIANA EXPANSIN-LIKE A2) | A. thaliana | 505 |    |    | 550.2796  | 1098.5446 | 1098.5458 | -0.0012 | 0 | 42   | 0.073   | 1 | R.SHGAWVTDK.V                   |
|    | NP_195553 |           | ATEXL2 (ARABIDOPSIS THALIANA EXPANSIN-LIKE A2) | A. thaliana | 505 |    |    | 554.7635  | 1107.5124 | 1107.5131 | -0.0007 | 1 | (30) | 1.4     | 1 | R.RVPCDYGNK.K                   |
|    | NP_195553 |           | ATEXL2 (ARABIDOPSIS THALIANA EXPANSIN-LIKE A2) | A. thaliana | 505 |    |    | 554.7639  | 1107.5132 | 1107.5131 | 0.0001  | 1 | (32) | 0.7     | 1 | R.RVPCDYGNK.K                   |
|    | NP_195553 |           | ATEXL2 (ARABIDOPSIS THALIANA EXPANSIN-LIKE A2) | A. thaliana | 505 |    |    | 554.7642  | 1107.5138 | 1107.5131 | 0.0007  | 1 | 35   | 0.38    | 1 | R.RVPCDYGNK.K                   |
|    | NP_195553 |           | ATEXL2 (ARABIDOPSIS THALIANA EXPANSIN-LIKE A2) | A. thaliana | 505 |    |    | 372.2059  | 1113.5959 | 1113.5965 | -0.0006 | 0 | (29) | 1.4     | 1 | R.AMAKPVVGADR.D                 |
|    | NP_195553 |           | ATEXL2 (ARABIDOPSIS THALIANA EXPANSIN-LIKE A2) | A. thaliana | 505 |    |    | 557.8054  | 1113.5962 | 1113.5965 | -0.0002 | 0 | (29) | 1.6     | 1 | R.AMAKPVVGADR.D                 |
|    | NP_195553 |           | ATEXL2 (ARABIDOPSIS THALIANA EXPANSIN-LIKE A2) | A. thaliana | 505 |    |    | 557.8054  | 1113.5962 | 1113.5965 | -0.0002 | 0 | (27) | 2.4     | 1 | R.AMAKPVVGADR.D                 |
|    | NP_195553 |           | ATEXL2 (ARABIDOPSIS THALIANA EXPANSIN-LIKE A2) | A. thaliana | 505 |    |    | 557.8055  | 1113.5964 | 1113.5965 | -0.0000 | 0 | (44) | 0.047   | 1 | R.AMAKPVVGADR.D                 |
|    | NP_195553 |           | ATEXL2 (ARABIDOPSIS THALIANA EXPANSIN-LIKE A2) | A. thaliana | 505 |    |    | 557.8055  | 1113.5964 | 1113.5965 | -0.0000 | 0 | 57   | 0.0028  | 1 | R.AMAKPVVGADR.D                 |
|    | NP_195553 |           | ATEXL2 (ARABIDOPSIS THALIANA EXPANSIN-LIKE A2) | A. thaliana | 505 |    |    | 585.8026  | 1129.5906 | 1129.5914 | -0.0007 | 0 | (48) | 0.018   | 1 | R.AMAKPVVGADR.D + Oxidation (M) |
|    | NP_195553 |           | ATEXL2 (ARABIDOPSIS THALIANA EXPANSIN-LIKE A2) | A. thaliana | 505 |    |    | 585.8026  | 1129.5906 | 1129.5914 | -0.0007 | 0 | (49) | 0.014   | 1 | R.AMAKPVVGADR.D + Oxidation (M) |
|    | NP_195553 |           | ATEXL2 (ARABIDOPSIS THALIANA EXPANSIN-LIKE A2) | A. thaliana | 505 |    |    | 585.8027  | 1129.5908 | 1129.5914 | -0.0005 | 0 | (35) | 0.39    | 1 | R.AMAKPVVGADR.D + Oxidation (M) |
|    | NP_195553 |           | ATEXL2 (ARABIDOPSIS THALIANA EXPANSIN-LIKE A2) | A. thaliana | 505 |    |    | 377.5377  | 1129.5913 | 1129.5914 | -0.0001 | 0 | (44) | 0.046   | 1 | R.AMAKPVVGADR.D + Oxidation (M) |
|    | NP_195553 |           | ATEXL2 (ARABIDOPSIS THALIANA EXPANSIN-LIKE A2) | A. thaliana | 505 |    |    | 377.5377  | 1129.5913 | 1129.5914 | -0.0001 | 0 | (46) | 0.032   | 1 | R.AMAKPVVGADR.D + Oxidation (M) |
|    | NP_195553 |           | ATEXL2 (ARABIDOPSIS THALIANA EXPANSIN-LIKE A2) | A. thaliana | 505 |    |    | 565.8032  | 1129.5918 | 1129.5914 | 0.0005  | 0 | (63) | 0.0057  | 1 | R.AMAKPVVGADR.D + Oxidation (M) |
|    | NP_195553 |           | ATEXL2 (ARABIDOPSIS THALIANA EXPANSIN-LIKE A2) | A. thaliana | 505 |    |    | 580.8292  | 1159.6438 | 1159.6449 | -0.0010 | 0 | 53   | 0.0068  | 1 | K.GTTVVTDLNT.K                  |
|    | NP_195553 |           | ATEXL2 (ARABIDOPSIS THALIANA EXPANSIN-LIKE A2) | A. thaliana | 505 |    |    | 580.8294  | 1159.6442 | 1159.6449 | -0.0006 | 0 | (48) | 0.019   | 1 | K.GTTVVTDLNT.K                  |
|    | NP_195553 |           | ATEXL2 (ARABIDOPSIS THALIANA EXPANSIN-LIKE A2) | A. thaliana | 505 |    |    | 580.8298  | 1159.6450 | 1159.6449 | 0.0002  | 0 | (60) | 0.014   | 1 | K.GTTVVTDLNT.K                  |
|    | NP_195553 |           | ATEXL2 (ARABIDOPSIS THALIANA EXPANSIN-LIKE A2) | A. thaliana | 505 |    |    | 597.7833  | 1193.5520 |           |         |   |      |         |   |                                 |

|    |           |            |                                                                       |             |     |   |    |          |           |           |         |   |      |         |   |                                       |
|----|-----------|------------|-----------------------------------------------------------------------|-------------|-----|---|----|----------|-----------|-----------|---------|---|------|---------|---|---------------------------------------|
|    | NP 195553 |            | ATEXLA2 (ARABIDOPSIS THALIANA EXPANSIN-LIKE A2)                       | A. thaliana | 505 |   |    | 528.6359 | 1582.8659 | 1582.8665 | -0.0006 | 1 | (24) | 3.3     | 1 | R.AMAKPVVGDARDLLK.Q                   |
|    | NP 195553 |            | ATEXLA2 (ARABIDOPSIS THALIANA EXPANSIN-LIKE A2)                       | A. thaliana | 505 |   |    | 533.9669 | 1598.8789 | 1598.8814 | -0.0025 | 1 | (27) | 2       | 1 | R.AMAKPVVGDARDLLK.Q + Oxidation (M)   |
|    | NP 195553 |            | ATEXLA2 (ARABIDOPSIS THALIANA EXPANSIN-LIKE A2)                       | A. thaliana | 505 |   |    | 533.9676 | 1598.8810 | 1598.8814 | -0.0004 | 1 | (16) | 22      | 1 | R.AMAKPVVGDARDLLK.Q + Oxidation (M)   |
| 19 | NP 190183 | AT3G045970 | ATEXLA1 (ARABIDOPSIS THALIANA EXPANSIN-LIKE A1)                       | A. thaliana | 381 | 9 | 31 | 476.7129 | 951.4112  | 951.4120  | -0.0008 | 0 | (28) | 1.9     | 1 | R.VPCDYGNK.N                          |
|    | NP 190183 |            | ATEXLA1 (ARABIDOPSIS THALIANA EXPANSIN-LIKE A1)                       | A. thaliana | 381 |   |    | 476.7130 | 951.4114  | 951.4120  | -0.0006 | 0 | 35   | 0.39    | 1 | R.VPCDYGNK.N                          |
|    | NP 190183 |            | ATEXLA1 (ARABIDOPSIS THALIANA EXPANSIN-LIKE A1)                       | A. thaliana | 381 |   |    | 494.7471 | 987.4796  | 987.5502  | -0.0705 | 0 | (29) | 1.6     | 1 | K.VPTGAQIFR.F                         |
|    | NP 190183 |            | ATEXLA1 (ARABIDOPSIS THALIANA EXPANSIN-LIKE A1)                       | A. thaliana | 381 |   |    | 494.7478 | 987.4810  | 987.5502  | -0.0691 | 0 | (31) | 1.2     | 1 | K.VPTGAQIFR.F                         |
|    | NP 190183 |            | ATEXLA1 (ARABIDOPSIS THALIANA EXPANSIN-LIKE A1)                       | A. thaliana | 381 |   |    | 494.7480 | 987.4814  | 987.5502  | -0.0687 | 0 | (37) | 0.24    | 1 | K.VPTGAQIFR.F                         |
|    | NP 190183 |            | ATEXLA1 (ARABIDOPSIS THALIANA EXPANSIN-LIKE A1)                       | A. thaliana | 381 |   |    | 494.7821 | 987.5496  | 987.5502  | -0.0005 | 0 | 50   | 0.014   | 1 | K.VPTGAQIFR.F                         |
|    | NP 190183 |            | ATEXLA1 (ARABIDOPSIS THALIANA EXPANSIN-LIKE A1)                       | A. thaliana | 381 |   |    | 502.7921 | 1003.5696 | 1003.5702 | -0.0005 | 0 | 25   | 4.6     | 7 | K.KPNVLEIK.L                          |
|    | NP 190183 |            | ATEXLA1 (ARABIDOPSIS THALIANA EXPANSIN-LIKE A1)                       | A. thaliana | 381 |   |    | 502.7922 | 1003.5698 | 1003.5702 | -0.0003 | 0 | (24) | 5.5     | 5 | K.KPNVLEIK.L                          |
|    | NP 190183 |            | ATEXLA1 (ARABIDOPSIS THALIANA EXPANSIN-LIKE A1)                       | A. thaliana | 381 |   |    | 521.7634 | 1041.5122 | 1041.5131 | -0.0009 | 0 | (44) | 0.041   | 1 | R.FVVTGCGYDGM.M                       |
|    | NP 190183 |            | ATEXLA1 (ARABIDOPSIS THALIANA EXPANSIN-LIKE A1)                       | A. thaliana | 381 |   |    | 521.7635 | 1041.5128 | 1041.5131 | -0.0007 | 0 | (41) | 0.085   | 1 | R.FVVTGCGYDGM.M                       |
|    | NP 190183 |            | ATEXLA1 (ARABIDOPSIS THALIANA EXPANSIN-LIKE A1)                       | A. thaliana | 381 |   |    | 521.7637 | 1041.5128 | 1041.5131 | -0.0003 | 0 | 54   | 0.0045  | 1 | R.FVVTGCGYDGM.M                       |
|    | NP 190183 |            | ATEXLA1 (ARABIDOPSIS THALIANA EXPANSIN-LIKE A1)                       | A. thaliana | 381 |   |    | 521.7638 | 1041.5130 | 1041.5131 | -0.0001 | 0 | (49) | 0.014   | 1 | R.FVVTGCGYDGM.M                       |
|    | NP 190183 |            | ATEXLA1 (ARABIDOPSIS THALIANA EXPANSIN-LIKE A1)                       | A. thaliana | 381 |   |    | 550.2786 | 1098.5446 | 1098.5458 | -0.0012 | 0 | 42   | 0.073   | 1 | R.SHGVAWYTDK.V                        |
|    | NP 190183 |            | ATEXLA1 (ARABIDOPSIS THALIANA EXPANSIN-LIKE A1)                       | A. thaliana | 381 |   |    | 550.8101 | 1099.6056 | 1099.6059 | -0.0003 | 0 | 36   | 0.31    | 1 | R.AMAKPVVGDADK.D                      |
|    | NP 190183 |            | ATEXLA1 (ARABIDOPSIS THALIANA EXPANSIN-LIKE A1)                       | A. thaliana | 381 |   |    | 602.8336 | 1203.6526 | 1203.6533 | -0.0007 | 0 | 47   | 0.022   | 1 | K.GTIVMTDLNK.S                        |
|    | NP 190183 |            | ATEXLA1 (ARABIDOPSIS THALIANA EXPANSIN-LIKE A1)                       | A. thaliana | 381 |   |    | 602.8337 | 1203.6528 | 1203.6533 | -0.0005 | 0 | (46) | 0.032   | 1 | K.GTIVMTDLNK.S                        |
|    | NP 190183 |            | ATEXLA1 (ARABIDOPSIS THALIANA EXPANSIN-LIKE A1)                       | A. thaliana | 381 |   |    | 610.8310 | 1219.6474 | 1219.6482 | -0.0008 | 0 | (47) | 0.022   | 1 | K.GTIVMTDLNK.S + Oxidation (M)        |
|    | NP 190183 |            | ATEXLA1 (ARABIDOPSIS THALIANA EXPANSIN-LIKE A1)                       | A. thaliana | 381 |   |    | 649.2744 | 1296.5342 | 1296.5340 | 0.0003  | 0 | 52   | 0.007   | 1 | K.DGAGCGACFOVR.C                      |
|    | NP 190183 |            | ATEXLA1 (ARABIDOPSIS THALIANA EXPANSIN-LIKE A1)                       | A. thaliana | 381 |   |    | 649.2744 | 1296.5342 | 1296.5340 | 0.0003  | 0 | (49) | 0.011   | 1 | K.DGAGCGACFOVR.C                      |
|    | NP 190183 |            | ATEXLA1 (ARABIDOPSIS THALIANA EXPANSIN-LIKE A1)                       | A. thaliana | 381 |   |    | 649.2745 | 1296.5344 | 1296.5340 | 0.0005  | 0 | (50) | 0.011   | 1 | K.DGAGCGACFOVR.C                      |
|    | NP 190183 |            | ATEXLA1 (ARABIDOPSIS THALIANA EXPANSIN-LIKE A1)                       | A. thaliana | 381 |   |    | 523.9725 | 1568.8957 | 1568.8960 | -0.0003 | 1 | (35) | 0.3     | 1 | R.AMAKPVVGDADKLLK.Q                   |
|    | NP 190183 |            | ATEXLA1 (ARABIDOPSIS THALIANA EXPANSIN-LIKE A1)                       | A. thaliana | 381 |   |    | 523.9725 | 1568.8957 | 1568.8960 | -0.0003 | 1 | 41   | 0.075   | 1 | R.AMAKPVVGDADKLLK.Q                   |
|    | NP 190183 |            | ATEXLA1 (ARABIDOPSIS THALIANA EXPANSIN-LIKE A1)                       | A. thaliana | 381 |   |    | 523.9725 | 1568.8957 | 1568.8960 | -0.0003 | 1 | (40) | 0.1     | 1 | R.AMAKPVVGDADKLLK.Q                   |
| 23 | NP 172267 | AT1G07890  | APXI (ASCORBATE PEROXIDASE 1)                                         | A. thaliana | 364 | 8 | 42 | 388.2133 | 774.4120  | 774.4123  | -0.0003 | 0 | 26   | 4.7     | 1 | K.ELLSGEK.E                           |
|    | NP 172267 |            | APXI (ASCORBATE PEROXIDASE 1)                                         | A. thaliana | 364 |   |    | 470.2210 | 938.4274  | 938.4280  | -0.0006 | 0 | 65   | 0.0038  | 1 | R.TGGPFGTMR.F + Oxidation (M)         |
|    | NP 172267 |            | APXI (ASCORBATE PEROXIDASE 1)                                         | A. thaliana | 364 |   |    | 470.2212 | 938.4278  | 938.4280  | -0.0002 | 0 | (59) | 0.0015  | 1 | R.TGGPFGTMR.F + Oxidation (M)         |
|    | NP 172267 |            | APXI (ASCORBATE PEROXIDASE 1)                                         | A. thaliana | 364 |   |    | 470.2212 | 938.4278  | 938.4280  | -0.0002 | 0 | (50) | 0.012   | 1 | R.TGGPFGTMR.F + Oxidation (M)         |
|    | NP 172267 |            | APXI (ASCORBATE PEROXIDASE 1)                                         | A. thaliana | 364 |   |    | 470.2213 | 938.4280  | 938.4280  | 0.0000  | 0 | (65) | 0.0037  | 1 | R.TGGPFGTMR.F + Oxidation (M)         |
|    | NP 172267 |            | APXI (ASCORBATE PEROXIDASE 1)                                         | A. thaliana | 364 |   |    | 488.7383 | 975.4620  | 975.4630  | -0.0009 | 0 | (17) | 28      | 1 | K.NCAPIMVRL + Oxidation (M)           |
|    | NP 172267 |            | APXI (ASCORBATE PEROXIDASE 1)                                         | A. thaliana | 364 |   |    | 488.7384 | 975.4622  | 975.4630  | -0.0007 | 0 | (19) | 19      | 5 | K.NCAPIMVRL + Oxidation (M)           |
|    | NP 172267 |            | APXI (ASCORBATE PEROXIDASE 1)                                         | A. thaliana | 364 |   |    | 488.7389 | 975.4632  | 975.4630  | 0.0003  | 0 | 19   | 18      | 1 | K.NCAPIMVRL + Oxidation (M)           |
|    | NP 172267 |            | APXI (ASCORBATE PEROXIDASE 1)                                         | A. thaliana | 364 |   |    | 551.3109 | 1100.6072 | 1100.6077 | -0.0005 | 0 | (44) | 0.053   | 1 | K.ELGLQLVSDKA                         |
|    | NP 172267 |            | APXI (ASCORBATE PEROXIDASE 1)                                         | A. thaliana | 364 |   |    | 551.3109 | 1100.6072 | 1100.6077 | -0.0005 | 0 | 46   | 0.029   | 1 | K.ELGLQLVSDKA                         |
|    | NP 172267 |            | APXI (ASCORBATE PEROXIDASE 1)                                         | A. thaliana | 364 |   |    | 417.2103 | 1248.6091 | 1248.6098 | -0.0008 | 0 | (14) | 46      | 6 | R.EDKQPPPPGRL                         |
|    | NP 172267 |            | APXI (ASCORBATE PEROXIDASE 1)                                         | A. thaliana | 364 |   |    | 625.3120 | 1248.6098 | 1248.6098 | -0.0004 | 0 | (29) | 1.6     | 2 | R.EDKQPPPPGRL                         |
|    | NP 172267 |            | APXI (ASCORBATE PEROXIDASE 1)                                         | A. thaliana | 364 |   |    | 625.3121 | 1248.6098 | 1248.6098 | -0.0002 | 0 | 32   | 0.74    | 2 | R.EDKQPPPPGRL                         |
|    | NP 172267 |            | APXI (ASCORBATE PEROXIDASE 1)                                         | A. thaliana | 364 |   |    | 417.2105 | 1248.6097 | 1248.6098 | -0.0002 | 0 | (12) | 76      | 7 | R.EDKQPPPPGRL                         |
|    | NP 172267 |            | APXI (ASCORBATE PEROXIDASE 1)                                         | A. thaliana | 364 |   |    | 417.2108 | 1248.6100 | 1248.6098 | 0.0001  | 0 | (15) | 41      | 6 | R.EDKQPPPPGRL                         |
|    | NP 172267 |            | APXI (ASCORBATE PEROXIDASE 1)                                         | A. thaliana | 364 |   |    | 625.3123 | 1248.6100 | 1248.6098 | 0.0002  | 0 | (24) | 5.2     | 2 | R.EDKQPPPPGRL                         |
|    | NP 172267 |            | APXI (ASCORBATE PEROXIDASE 1)                                         | A. thaliana | 364 |   |    | 672.3275 | 1342.6404 | 1342.6405 | -0.0001 | 1 | 35   | 0.31    | 1 | K.NYVTSDEYK.A                         |
|    | NP 172267 |            | APXI (ASCORBATE PEROXIDASE 1)                                         | A. thaliana | 364 |   |    | 806.4583 | 1610.9020 | 1610.9032 | -0.0011 | 0 | (41) | 0.068   | 1 | K.ALLDDPVFRVLEK.Y                     |
|    | NP 172267 |            | APXI (ASCORBATE PEROXIDASE 1)                                         | A. thaliana | 364 |   |    | 937.5750 | 1610.9032 | 1610.9032 | -0.0000 | 0 | (10) | 84      | 9 | K.ALLDDPVFRVLEK.Y                     |
|    | NP 172267 |            | APXI (ASCORBATE PEROXIDASE 1)                                         | A. thaliana | 364 |   |    | 806.4592 | 1610.9038 | 1610.9032 | 0.0007  | 0 | 49   | 0.012   | 1 | K.ALLDDPVFRVLEK.Y                     |
|    | NP 172267 |            | APXI (ASCORBATE PEROXIDASE 1)                                         | A. thaliana | 364 |   |    | 636.3218 | 1905.9436 | 1905.9445 | -0.0010 | 0 | 63   | 0.0038  | 1 | R.FDAEQAHGANGSHIAL.RL                 |
|    | NP 172267 |            | APXI (ASCORBATE PEROXIDASE 1)                                         | A. thaliana | 364 |   |    | 477.4932 | 1905.9437 | 1905.9445 | -0.0008 | 0 | (13) | 40      | 6 | R.FDAEQAHGANGSHIAL.RL                 |
|    | NP 172267 |            | APXI (ASCORBATE PEROXIDASE 1)                                         | A. thaliana | 364 |   |    | 477.4932 | 1905.9437 | 1905.9445 | -0.0008 | 0 | (14) | 28      | 1 | R.FDAEQAHGANGSHIAL.RL                 |
|    | NP 172267 |            | APXI (ASCORBATE PEROXIDASE 1)                                         | A. thaliana | 364 |   |    | 636.3220 | 1905.9442 | 1905.9445 | -0.0004 | 0 | (52) | 0.005   | 1 | R.FDAEQAHGANGSHIAL.RL                 |
|    | NP 172267 |            | APXI (ASCORBATE PEROXIDASE 1)                                         | A. thaliana | 364 |   |    | 694.2906 | 2079.8500 | 2079.8520 | -0.0020 | 0 | 28   | 2.3     | 1 | K.YAEDAEFDADYAEAHMK.L + Oxidation (M) |
| 24 | NP 171792 | AT1G02930  | ATGSTF6 (Early Responsive to dehydration 11); glutathione transferase | A. thaliana | 288 | 7 | 24 | 326.1766 | 650.3386  | 650.3388  | -0.0003 | 0 | (11) | 1.1e+02 | 1 | K.IFESR.A                             |
|    | NP 171792 |            | ATGSTF6 (Early Responsive to dehydration 11); glutathione transferase | A. thaliana | 288 |   |    | 326.1766 | 650.3386  | 650.3388  | -0.0001 | 0 | (22) | 8.4     | 1 | K.IFESR.A                             |
|    | NP 171792 |            | ATGSTF6 (Early Responsive to dehydration 11); glutathione transferase | A. thaliana | 288 |   |    | 326.1766 | 650.3386  | 650.3388  | -0.0001 | 0 | (16) | 34      | 1 | K.IFESR.A                             |
|    | NP 171792 |            | ATGSTF6 (Early Responsive to dehydration 11); glutathione transferase | A. thaliana | 288 |   |    | 326.1766 | 650.3386  | 650.3388  | -0.0001 | 0 | 23   | 6.5     | 1 | K.IFESR.A                             |
|    | NP 171792 |            | ATGSTF6 (Early Responsive to dehydration 11); glutathione transferase | A. thaliana | 288 |   |    | 326.1766 | 650.3386  | 650.3388  | -0.0001 | 0 | (23) | 6.9     | 1 | K.IFESR.A                             |
|    | NP 171792 |            | ATGSTF6 (Early Responsive to dehydration 11); glutathione transferase | A. thaliana | 288 |   |    | 452.2479 | 902.4812  | 902.4821  | -0.0009 | 0 | (40) | 0.15    | 1 | K.GNNLLSTGK.D                         |
|    | NP 171792 |            | ATGSTF6 (Early Responsive to dehydration 11); glutathione transferase | A. thaliana | 288 |   |    | 452.2482 | 902.4818  | 902.4821  | -0.0003 | 0 | 43   | 0.069   | 1 | K.GNNLLSTGK.D                         |
|    | NP 171792 |            | ATGSTF6 (Early Responsive to dehydration 11); glutathione transferase | A. thaliana | 288 |   |    | 461.7892 | 921.5638  | 921.5647  | -0.0009 | 0 | (45) | 0.041   | 1 | R.VLIAHEK.N                           |
|    | NP 171792 |            | ATGSTF6 (Early Responsive to dehydration 11); glutathione transferase | A. thaliana | 288 |   |    | 461.7894 | 921.5642  | 921.5647  | -0.0005 | 0 | (35) | 0.37    | 1 | R.VLIAHEK.N                           |
|    | NP 171792 |            | ATGSTF6 (Early Responsive to dehydration 11); glutathione transferase | A. thaliana | 288 |   |    | 461.7894 | 921.5642  | 921.5647  | -0.0005 | 0 | 46   | 0.033   | 1 | R.VLIAHEK.N                           |
|    | NP 171792 |            | ATGSTF6 (Early Responsive to dehydration 11); glutathione transferase | A. thaliana | 288 |   |    | 344.1818 | 1029.5236 | 1029.5243 | -0.0008 | 0 | (18) | 24      | 5 | K.VLDVYEHRL                           |
|    | NP 171792 |            | ATGSTF6 (Early Responsive to dehydration 11); glutathione transferase | A. thaliana | 288 |   |    | 515.7692 | 1029.5238 | 1029.5243 | -0.0005 | 0 | (42) | 0.096   | 1 | K.VLDVYEHRL                           |
|    | NP 171792 |            | ATGSTF6 (Early Responsive to dehydration 11); glutathione transferase | A. thaliana | 288 |   |    | 515.7692 | 1029.5238 | 1029.5243 | -0.0005 | 0 | (47) | 0.029   | 1 | K.VLDVYEHRL                           |
|    | NP 171792 |            | ATGSTF6 (Early Responsive to dehydration 11); glutathione transferase | A. thaliana | 288 |   |    | 515.7692 | 1029.5238 | 1029.5243 | -0.0005 | 0 | 56   | 0.0031  | 1 | K.VLDVYEHRL                           |
|    | NP 171792 |            | ATGSTF6 (Early Responsive to dehydration 11); glutathione transferase | A. thaliana | 288 |   |    | 515.7692 | 1029.5238 | 1029.5243 | -0.0005 | 0 | (45) | 0.042   | 1 | K.VLDVYEHRL                           |
|    | NP 171792 |            | ATGSTF6 (Early Responsive to dehydration 11); glutathione transferase | A. thaliana | 288 |   |    | 515.7693 | 1029.5240 | 1029.5243 | -0.0003 | 0 | (50) | 0.015   | 1 | K.VLDVYEHRL                           |
|    | NP 171792 |            | ATGSTF6 (Early Responsive to dehydration 11); glutathione transferase | A. thaliana | 288 |   |    | 344.1821 | 1029.5245 | 1029.5243 | 0.0001  | 0 | (17) | 30      | 6 | K.VLDVYEHRL                           |
|    | NP 171792 |            | ATGSTF6 (Early Responsive to dehydration 11); glutathione transferase | A. thaliana | 288 |   |    | 517.2552 | 1032.4958 | 1032.4975 | -0.0016 | 0 | (35) | 0.39    | 1 | K.TVVEEAK.L                           |
|    | NP 171792 |            | ATGSTF6 (Early Responsive to dehydration 11); glutathione transferase | A. thaliana | 288 |   |    | 517.2558 | 1032.4970 | 1032.4975 | -0.0004 | 0 | (39) | 0.16    | 1 | K.TVVEEAK.L                           |
|    | NP 171792 |            | ATGSTF6 (Early Responsive to dehydration 11); glutathione transferase | A. thaliana | 288 |   |    | 517.2559 | 1032.4972 | 1032.4975 | -0.0003 | 0 | (28) | 1.9     | 1 | K.TVVEEAK.L                           |
|    | NP 171792 |            | ATGSTF6 (Early Responsive to dehydration 11); glutathione transferase | A. thaliana | 288 |   |    | 517.2559 | 1032.4972 | 1032.4975 | -0.0003 | 0 | 42   | 0.088   | 1 | K.TVVEEAK.L                           |
|    | NP 171792 |            | ATGSTF6 (Early Responsive to dehydration 11); glutathione transferase | A. thaliana | 288 |   |    | 360.2291 | 1077.6655 | 1077.6658 | -0.0004 | 1 | 25   | 7.4     | 1 | R.RVLIAHEK.N                          |
|    | NP 171792 |            | ATGSTF6 (Early Responsive to dehydration 11); glutathione transferase | A. thaliana | 288 |   |    | 539.8401 | 1077.6656 | 1077.6658 | -0.0002 | 1 | (20) | 22      | 5 | R.RVLIAHEK.N                          |
|    | NP 171792 |            | ATGSTF6 (Early Responsive to dehydration 11); glutathione transferase | A. thaliana | 288 |   |    | 539      |           |           |         |   |      |         |   |                                       |

|    |           |           |                                                                       |             |     |   |    |            |           |           |         |   |      |         |    |                                  |
|----|-----------|-----------|-----------------------------------------------------------------------|-------------|-----|---|----|------------|-----------|-----------|---------|---|------|---------|----|----------------------------------|
|    | NP_171792 |           | ATGSTF6 (Early Responsive to dehydration 11); glutathione transferase | A. thaliana | 288 |   |    | 572.2987   | 1142.5828 | 1142.5833 | -0.0004 | 0 | (21) | 8.6     | 2  | K.VFGHPASTATR.R                  |
|    | NP_171792 |           | ATGSTF6 (Early Responsive to dehydration 11); glutathione transferase | A. thaliana | 288 |   |    | 572.2987   | 1142.5828 | 1142.5833 | -0.0004 | 0 | (45) | 0.042   | 1  | K.VFGHPASTATR.R                  |
|    | NP_171792 |           | ATGSTF6 (Early Responsive to dehydration 11); glutathione transferase | A. thaliana | 288 |   |    | 572.2988   | 1142.5830 | 1142.5833 | -0.0002 | 0 | (26) | 2.8     | 1  | K.VFGHPASTATR.R                  |
|    | NP_171792 |           | ATGSTF6 (Early Responsive to dehydration 11); glutathione transferase | A. thaliana | 288 |   |    | 381.8683   | 1142.5831 | 1142.5833 | -0.0002 | 0 | (23) | 6.2     | 1  | K.VFGHPASTATR.R                  |
|    | NP_171792 |           | ATGSTF6 (Early Responsive to dehydration 11); glutathione transferase | A. thaliana | 288 |   |    | 381.8683   | 1142.5831 | 1142.5833 | -0.0002 | 0 | (31) | 0.95    | 1  | K.VFGHPASTATR.R                  |
| 25 | CAA61411  | AT4G11650 | osmotin                                                               | A. thaliana | 135 | 3 | 9  | 387.7213   | 773.4283  | 773.4283  | -0.0003 | 0 | 40   | 0.19    | 1  | R.LDVAAGTK.M                     |
|    | CAA61411  |           | osmotin                                                               | A. thaliana | 135 |   |    | 387.7213   | 773.4280  | 773.4283  | -0.0003 | 0 | (39) | 0.24    | 1  | R.LDVAAGTK.M                     |
|    | CAA61411  |           | osmotin                                                               | A. thaliana | 135 |   |    | 387.7214   | 773.4282  | 773.4283  | -0.0001 | 0 | (32) | 1.3     | 1  | R.LDVAAGTK.M                     |
|    | CAA61411  |           | osmotin                                                               | A. thaliana | 135 |   |    | 387.7215   | 773.4284  | 773.4283  | 0.0001  | 0 | (34) | 0.78    | 1  | R.LDVAAGTK.M                     |
|    | CAA61411  |           | osmotin                                                               | A. thaliana | 135 |   |    | 389.2072   | 776.3998  | 776.4003  | -0.0005 | 0 | (22) | 11      | 1  | R.VVFCPR.S                       |
|    | CAA61411  |           | osmotin                                                               | A. thaliana | 135 |   |    | 389.2074   | 776.4002  | 776.4003  | -0.0001 | 0 | 25   | 5.5     | 1  | R.VVFCPR.S                       |
|    | CAA61411  |           | osmotin                                                               | A. thaliana | 135 |   |    | 579.2350   | 1156.4554 | 1156.4567 | -0.0013 | 0 | (47) | 0.024   | 1  | R.TNCFDSSGR.G                    |
|    | CAA61411  |           | osmotin                                                               | A. thaliana | 135 |   |    | 579.2353   | 1156.4560 | 1156.4567 | -0.0007 | 0 | (49) | 0.015   | 1  | R.TNCFDSSGR.G                    |
|    | CAA61411  |           | osmotin                                                               | A. thaliana | 135 |   |    | 579.2354   | 1156.4562 | 1156.4567 | -0.0005 | 0 | (55) | 0.0034  | 1  | R.TNCFDSSGR.G                    |
|    | CAA61411  |           | osmotin                                                               | A. thaliana | 135 |   |    | 579.2354   | 1156.4562 | 1156.4567 | -0.0005 | 0 | (53) | 0.0032  | 1  | R.TNCFDSSGR.G                    |
|    | CAA61411  |           | osmotin                                                               | A. thaliana | 135 |   |    | 579.2356   | 1156.4566 | 1156.4567 | -0.0001 | 0 | 70   | 0.00013 | 1  | R.TNCFDSSGR.G                    |
| 26 | NP_195585 | AT4G38740 | ROCI (rotamase CyP 1); peptidyl-prolyl cis-trans isomerase            | A. thaliana | 340 | 8 | 43 | 369.1823   | 736.3500  | 736.3504  | -0.0003 | 0 | 26   | 5       | 1  | R.TAENFRA                        |
|    | NP_195585 |           | ROCI (rotamase CyP 1); peptidyl-prolyl cis-trans isomerase            | A. thaliana | 340 |   |    | 369.1823   | 736.3500  | 736.3504  | -0.0003 | 0 | (21) | 18      | 3  | R.TAENFRA                        |
|    | NP_195585 |           | ROCI (rotamase CyP 1); peptidyl-prolyl cis-trans isomerase            | A. thaliana | 340 |   |    | 369.1824   | 736.3502  | 736.3504  | -0.0001 | 0 | (25) | 7.3     | 1  | R.TAENFRA                        |
|    | NP_195585 |           | ROCI (rotamase CyP 1); peptidyl-prolyl cis-trans isomerase            | A. thaliana | 340 |   |    | 369.1824   | 736.3502  | 736.3504  | -0.0001 | 0 | (24) | 8.5     | 1  | R.TAENFRA                        |
|    | NP_195585 |           | ROCI (rotamase CyP 1); peptidyl-prolyl cis-trans isomerase            | A. thaliana | 340 |   |    | 369.1826   | 736.3506  | 736.3504  | 0.0003  | 0 | (21) | 16      | 2  | R.TAENFRA                        |
|    | NP_195585 |           | ROCI (rotamase CyP 1); peptidyl-prolyl cis-trans isomerase            | A. thaliana | 340 |   |    | 543.2301   | 1084.4458 | 1084.4461 | -0.0005 | 0 | (39) | 0.15    | 1  | K.FEDENFER.K                     |
|    | NP_195585 |           | ROCI (rotamase CyP 1); peptidyl-prolyl cis-trans isomerase            | A. thaliana | 340 |   |    | 543.2302   | 1084.4458 | 1084.4461 | -0.0003 | 0 | 45   | 0.038   | 1  | K.FEDENFER.K                     |
|    | NP_195585 |           | ROCI (rotamase CyP 1); peptidyl-prolyl cis-trans isomerase            | A. thaliana | 340 |   |    | 543.2302   | 1084.4458 | 1084.4461 | -0.0003 | 0 | (42) | 0.08    | 1  | K.FEDENFER.K                     |
|    | NP_195585 |           | ROCI (rotamase CyP 1); peptidyl-prolyl cis-trans isomerase            | A. thaliana | 340 |   |    | 543.2303   | 1084.4460 | 1084.4461 | -0.0001 | 0 | (43) | 0.053   | 1  | K.FEDENFER.K                     |
|    | NP_195585 |           | ROCI (rotamase CyP 1); peptidyl-prolyl cis-trans isomerase            | A. thaliana | 340 |   |    | 556.2881   | 1110.5616 | 1110.5631 | -0.0014 | 0 | 55   | 0.0033  | 1  | R.VMELYTDK.T                     |
|    | NP_195585 |           | ROCI (rotamase CyP 1); peptidyl-prolyl cis-trans isomerase            | A. thaliana | 340 |   |    | 564.2858   | 1126.5570 | 1126.5580 | -0.0010 | 0 | (44) | 0.046   | 1  | R.VMELYTDK.T + Oxidation (M)     |
|    | NP_195585 |           | ROCI (rotamase CyP 1); peptidyl-prolyl cis-trans isomerase            | A. thaliana | 340 |   |    | 564.2859   | 1126.5572 | 1126.5580 | -0.0008 | 0 | (49) | 0.015   | 1  | R.VMELYTDK.T + Oxidation (M)     |
|    | NP_195585 |           | ROCI (rotamase CyP 1); peptidyl-prolyl cis-trans isomerase            | A. thaliana | 340 |   |    | 564.2860   | 1126.5574 | 1126.5580 | -0.0006 | 0 | (54) | 0.0044  | 1  | R.VMELYTDK.T + Oxidation (M)     |
|    | NP_195585 |           | ROCI (rotamase CyP 1); peptidyl-prolyl cis-trans isomerase            | A. thaliana | 340 |   |    | 564.2862   | 1126.5578 | 1126.5580 | -0.0002 | 0 | (49) | 0.015   | 1  | R.VMELYTDK.T + Oxidation (M)     |
|    | NP_195585 |           | ROCI (rotamase CyP 1); peptidyl-prolyl cis-trans isomerase            | A. thaliana | 340 |   |    | 564.2878   | 1126.5510 | 1126.5580 | 0.0030  | 0 | (28) | 1.8     | 1  | R.VMELYTDK.T + Oxidation (M)     |
|    | NP_195585 |           | ROCI (rotamase CyP 1); peptidyl-prolyl cis-trans isomerase            | A. thaliana | 340 |   |    | 599.3402   | 1196.6658 | 1196.6666 | -0.0008 | 0 | (22) | 7.6     | 1  | K.GVGTGKPLHF.K                   |
|    | NP_195585 |           | ROCI (rotamase CyP 1); peptidyl-prolyl cis-trans isomerase            | A. thaliana | 340 |   |    | 599.3402   | 1196.6658 | 1196.6666 | -0.0008 | 0 | (32) | 2.4     | 1  | K.GVGTGKPLHF.K                   |
|    | NP_195585 |           | ROCI (rotamase CyP 1); peptidyl-prolyl cis-trans isomerase            | A. thaliana | 340 |   |    | 599.3404   | 1196.6662 | 1196.6666 | -0.0004 | 0 | 34   | 0.42    | 1  | K.GVGTGKPLHF.K                   |
|    | NP_195585 |           | ROCI (rotamase CyP 1); peptidyl-prolyl cis-trans isomerase            | A. thaliana | 340 |   |    | 607.2779   | 1212.5412 | 1212.5411 | 0.0002  | 1 | 22   | 7       | 1  | K.FEDENFER.K                     |
|    | NP_195585 |           | ROCI (rotamase CyP 1); peptidyl-prolyl cis-trans isomerase            | A. thaliana | 340 |   |    | 741.3865   | 1480.7584 | 1480.7596 | -0.0011 | 1 | 26   | 3.6     | 1  | R.VMELYTDK.TPR.T + Oxidation (M) |
|    | NP_195585 |           | ROCI (rotamase CyP 1); peptidyl-prolyl cis-trans isomerase            | A. thaliana | 340 |   |    | 812.9559   | 1623.8972 | 1623.8985 | -0.0012 | 0 | 95   | 2.5e-07 | 1  | K.HVVFQGVVGLDVK.A                |
|    | NP_195585 |           | ROCI (rotamase CyP 1); peptidyl-prolyl cis-trans isomerase            | A. thaliana | 340 |   |    | 542.3071   | 1023.8995 | 1023.8995 | 0.0010  | 0 | (30) | 0.83    | 1  | K.HVVFQGVVGLDVK.A                |
|    | NP_195585 |           | ROCI (rotamase CyP 1); peptidyl-prolyl cis-trans isomerase            | A. thaliana | 340 |   |    | 11037.0350 | 2072.0554 | 2072.0572 | -0.0018 | 0 | 37   | 0.18    | 1  | K.VSSSSGKTPVAVDCQGL.S.           |
|    | NP_195585 |           | ROCI (rotamase CyP 1); peptidyl-prolyl cis-trans isomerase            | A. thaliana | 340 |   |    | 691.6927   | 2072.0563 | 2072.0572 | -0.0010 | 0 | (20) | 7.3     | 1  | K.VSSSSGKTPVAVDCQGL.S.           |
| 27 | NP_190864 | AT3G52960 | peroxiredoxin type 2                                                  | A. thaliana | 120 | 4 | 16 | 435.7449   | 869.4752  | 869.4766  | -0.0007 | 0 | (13) | 57      | 1  | K.HVPGFVSK.A                     |
|    | NP_190864 |           | peroxiredoxin type 2                                                  | A. thaliana | 120 |   |    | 435.7451   | 869.4756  | 869.4760  | -0.0003 | 0 | (10) | 1e+02   | 2  | K.HVPGFVSK.A                     |
|    | NP_190864 |           | peroxiredoxin type 2                                                  | A. thaliana | 120 |   |    | 435.7451   | 869.4756  | 869.4760  | -0.0003 | 0 | 16   | 30      | 2  | K.HVPGFVSK.A                     |
|    | NP_190864 |           | peroxiredoxin type 2                                                  | A. thaliana | 120 |   |    | 470.7819   | 939.5492  | 939.5502  | -0.0009 | 0 | (21) | 7.4     | 1  | R.DPKPVLGVR.S                    |
|    | NP_190864 |           | peroxiredoxin type 2                                                  | A. thaliana | 120 |   |    | 470.7822   | 939.5498  | 939.5502  | -0.0003 | 0 | (15) | 35      | 9  | R.DPKPVLGVR.S                    |
|    | NP_190864 |           | peroxiredoxin type 2                                                  | A. thaliana | 120 |   |    | 470.7822   | 939.5498  | 939.5502  | -0.0003 | 0 | 22   | 7       | 1  | R.DPKPVLGVR.S                    |
|    | NP_190864 |           | peroxiredoxin type 2                                                  | A. thaliana | 120 |   |    | 532.3029   | 1062.5912 | 1062.5921 | -0.0009 | 0 | (37) | 0.22    | 1  | K.TVTVSSLTAG.K                   |
|    | NP_190864 |           | peroxiredoxin type 2                                                  | A. thaliana | 120 |   |    | 532.3029   | 1062.5912 | 1062.5921 | -0.0009 | 0 | 52   | 0.0082  | 1  | K.TVTVSSLTAG.K                   |
|    | NP_190864 |           | peroxiredoxin type 2                                                  | A. thaliana | 120 |   |    | 532.3035   | 1062.5924 | 1062.5921 | 0.0003  | 0 | (49) | 0.016   | 1  | K.TVTVSSLTAG.K                   |
|    | NP_190864 |           | peroxiredoxin type 2                                                  | A. thaliana | 120 |   |    | 582.3187   | 1162.6228 | 1162.6234 | -0.0005 | 0 | 31   | 1       | 2  | R.VAILADGVVK.V                   |
| 13 | AAM67072  | AT1G75750 | GAST1-like protein                                                    | A. thaliana | 438 | 7 | 46 | 524.1934   | 1046.3722 | 1046.3732 | -0.0010 | 0 | (20) | 18      | 8  | R.ACGTCYR.C                      |
|    | AAM67072  |           | GAST1-like protein                                                    | A. thaliana | 438 |   |    | 524.1935   | 1046.3724 | 1046.3732 | -0.0008 | 0 | (33) | 0.78    | 1  | R.ACGTCYR.C                      |
|    | AAM67072  |           | GAST1-like protein                                                    | A. thaliana | 438 |   |    | 524.1935   | 1046.3724 | 1046.3732 | -0.0008 | 0 | (35) | 0.55    | 1  | R.ACGTCYR.C                      |
|    | AAM67072  |           | GAST1-like protein                                                    | A. thaliana | 438 |   |    | 524.1936   | 1046.3726 | 1046.3732 | -0.0006 | 0 | (23) | 7.5     | 4  | R.ACGTCYR.C                      |
|    | AAM67072  |           | GAST1-like protein                                                    | A. thaliana | 438 |   |    | 524.1936   | 1046.3726 | 1046.3732 | -0.0006 | 0 | (26) | 4.4     | 5  | R.ACGTCYR.C                      |
|    | AAM67072  |           | GAST1-like protein                                                    | A. thaliana | 438 |   |    | 524.1936   | 1046.3726 | 1046.3732 | -0.0006 | 0 | (34) | 0.6     | 1  | R.ACGTCYR.C                      |
|    | AAM67072  |           | GAST1-like protein                                                    | A. thaliana | 438 |   |    | 524.1936   | 1046.3726 | 1046.3732 | -0.0006 | 0 | (41) | 0.14    | 1  | R.ACGTCYR.C                      |
|    | AAM67072  |           | GAST1-like protein                                                    | A. thaliana | 438 |   |    | 524.1936   | 1046.3726 | 1046.3732 | -0.0006 | 0 | (28) | 2.8     | 2  | R.ACGTCYR.C                      |
|    | AAM67072  |           | GAST1-like protein                                                    | A. thaliana | 438 |   |    | 524.1936   | 1046.3726 | 1046.3732 | -0.0006 | 0 | (33) | 0.86    | 2  | R.ACGTCYR.C                      |
|    | AAM67072  |           | GAST1-like protein                                                    | A. thaliana | 438 |   |    | 524.1936   | 1046.3726 | 1046.3732 | -0.0006 | 0 | (36) | 0.45    | 2  | R.ACGTCYR.C                      |
|    | AAM67072  |           | GAST1-like protein                                                    | A. thaliana | 438 |   |    | 524.1937   | 1046.3728 | 1046.3732 | -0.0004 | 0 | (28) | 2.5     | 2  | R.ACGTCYR.C                      |
|    | AAM67072  |           | GAST1-like protein                                                    | A. thaliana | 438 |   |    | 524.1937   | 1046.3728 | 1046.3732 | -0.0004 | 0 | (19) | 18      | 10 | R.ACGTCYR.C                      |
|    | AAM67072  |           | GAST1-like protein                                                    | A. thaliana | 438 |   |    | 524.1937   | 1046.3728 | 1046.3732 | -0.0004 | 0 | (39) | 0.21    | 2  | R.ACGTCYR.C                      |
|    | AAM67072  |           | GAST1-like protein                                                    | A. thaliana | 438 |   |    | 524.1937   | 1046.3728 | 1046.3732 | -0.0004 | 0 | (36) | 0.36    | 1  | R.ACGTCYR.C                      |
|    | AAM67072  |           | GAST1-like protein                                                    | A. thaliana | 438 |   |    | 524.1937   | 1046.3728 | 1046.3732 | -0.0004 | 0 | (27) | 3       | 4  | R.ACGTCYR.C                      |
|    | AAM67072  |           | GAST1-like protein                                                    | A. thaliana | 438 |   |    | 524.1937   | 1046.3728 | 1046.3732 | -0.0004 | 0 | (32) | 0.94    | 2  | R.ACGTCYR.C                      |
|    | AAM67072  |           | GAST1-like protein                                                    | A. thaliana | 438 |   |    | 524.1937   | 1046.3728 | 1046.3732 | -0.0004 | 0 | (34) | 0.59    | 1  | R.ACGTCYR.C                      |
|    | AAM67072  |           | GAST1-like protein                                                    | A. thaliana | 438 |   |    | 524.1937   | 1046.3728 | 1046.3732 | -0.0004 | 0 | 41   | 0.14    | 1  | R.ACGTCYR.C                      |
|    | AAM67072  |           | GAST1-like protein                                                    | A. thaliana | 438 |   |    | 524.1937   | 1046.3728 | 1046.3732 | -0.0004 | 0 | (34) | 0.58    | 2  | R.ACGTCYR.C                      |
|    | AAM67072  |           | GAST1-like protein                                                    | A. thaliana | 438 |   |    | 524.1937   | 1046.3728 | 1046.3732 | -0.0004 | 0 | (29) | 1.9     | 1  | R.ACGTCYR.C                      |
|    | AAM67072  |           | GAST1-like protein                                                    | A. thaliana | 438 |   |    | 524.1938   | 1046.3730 | 1046.3732 | -0.0002 | 0 | (17) | 30      | 9  | R.ACGTCYR.C                      |
|    | AAM67072  |           | GAST1-like protein                                                    | A. thaliana | 438 |   |    | 524.1938   | 1046.3730 | 1046.3732 | -0.0002 | 0 | (33) | 0.77    | 2  | R.ACGTCYR.C                      |
|    | AAM67072  |           | GAST1-like protein                                                    | A. thaliana | 438 |   |    | 554.7467   | 1107.4788 | 1107.4801 | -0.0013 | 0 | (75) | 4.2e-05 | 1  | K.IDCGSACVAR.C                   |
|    | AAM67072  |           | GAST1-like protein                                                    | A. thaliana | 438 |   |    | 554.7469   | 1107.4792 | 1107.4801 | -0.0009 | 0 | 75   | 4.2e-05 | 1  | K.IDCGSACVAR.C                   |
|    | AAM67072  |           | GAST1-like protein                                                    | A. thaliana | 438 |   |    | 554.7471   | 1107.4796 | 1107.4801 | -0.0005 | 0 | (73) | 5.7e-05 | 1  | K.IDCGSACVAR.C                   |
|    | AAM67072  |           | GAST1-like protein                                                    | A. thaliana | 438 |   |    | 554.7471   | 1107.4796 | 1107.4801 | -0.0005 | 0 | (74) | 4.8e-05 | 1  | K.IDCGSACVAR.C                   |
|    | AAM67072  |           | GAST1-like protein                                                    | A. thaliana | 438 |   |    | 554.7471   | 1107.4796 | 1107.4801 | -0.0005 | 0 | (74) | 4.7e-05 | 1  | K.IDCGSACVAR.C                   |
|    | AAM67072  |           | GAST1-like protein                                                    | A. thaliana | 438 |   |    | 561.7549   | 1121.4952 | 1121.4958 | -0.0005 | 0 | (49) | 0.014   | 1  | K.IDCASACVAR.C                   |

|    |           |           |                                                                             |             |     |    |    |          |           |           |         |   |      |         |   |                                  |
|----|-----------|-----------|-----------------------------------------------------------------------------|-------------|-----|----|----|----------|-----------|-----------|---------|---|------|---------|---|----------------------------------|
|    | AAM67072  |           | GAST1-like protein                                                          | A. thaliana | 438 |    |    | 618.7943 | 1235.5740 | 1235.5751 | -0.0010 | 1 | (63) | 0.0055  | 1 | K.KIDCGSACVAR.C                  |
|    | AAM67072  |           | GAST1-like protein                                                          | A. thaliana | 438 |    |    | 618.7944 | 1235.5742 | 1235.5751 | -0.0008 | 1 | (64) | 0.0051  | 1 | K.KIDCGSACVAR.C                  |
|    | AAM67072  |           | GAST1-like protein                                                          | A. thaliana | 438 |    |    | 412.8654 | 1235.5744 | 1235.5751 | -0.0007 | 1 | (37) | 0.24    | 1 | K.KIDCGSACVAR.C                  |
|    | AAM67072  |           | GAST1-like protein                                                          | A. thaliana | 438 |    |    | 412.8654 | 1235.5744 | 1235.5751 | -0.0007 | 1 | (37) | 0.21    | 1 | K.KIDCGSACVAR.C                  |
|    | AAM67072  |           | GAST1-like protein                                                          | A. thaliana | 438 |    |    | 618.7946 | 1235.5746 | 1235.5751 | -0.0004 | 1 | (27) | 2.3     | 1 | K.KIDCGSACVAR.C                  |
|    | AAM67072  |           | GAST1-like protein                                                          | A. thaliana | 438 |    |    | 618.7946 | 1235.5746 | 1235.5751 | -0.0004 | 1 | (63) | 0.0054  | 1 | K.KIDCGSACVAR.C                  |
|    | AAM67072  |           | GAST1-like protein                                                          | A. thaliana | 438 |    |    | 618.7946 | 1235.5746 | 1235.5751 | -0.0004 | 1 | 56   | 0.0031  | 1 | K.KIDCGSACVAR.C                  |
|    | AAM67072  |           | GAST1-like protein                                                          | A. thaliana | 438 |    |    | 412.8657 | 1235.5753 | 1235.5751 | 0.0002  | 1 | (18) | 19      | 2 | K.KIDCGSACVAR.C                  |
|    | AAM67072  |           | GAST1-like protein                                                          | A. thaliana | 438 |    |    | 412.8657 | 1235.5753 | 1235.5751 | 0.0002  | 1 | (38) | 0.2     | 1 | K.KIDCGSACVAR.C                  |
|    | AAM67072  |           | GAST1-like protein                                                          | A. thaliana | 438 |    |    | 412.8657 | 1235.5753 | 1235.5751 | 0.0002  | 1 | (37) | 0.24    | 1 | K.KIDCGSACVAR.C                  |
|    | AAM67072  |           | GAST1-like protein                                                          | A. thaliana | 438 |    |    | 413.1934 | 1236.5584 | 1236.5380 | 0.0204  | 0 | (18) | 20      | 7 | K.IDCWSACVAR.C                   |
|    | AAM67072  |           | GAST1-like protein                                                          | A. thaliana | 438 |    |    | 413.1935 | 1236.5587 | 1236.5380 | 0.0207  | 0 | 36   | 0.29    | 1 | K.IDCWSACVAR.C                   |
|    | AAM67072  |           | GAST1-like protein                                                          | A. thaliana | 438 |    |    | 413.1935 | 1236.5587 | 1236.5380 | 0.0207  | 0 | (36) | 0.29    | 1 | K.IDCWSACVAR.C                   |
|    | AAM67072  |           | GAST1-like protein                                                          | A. thaliana | 438 |    |    | 413.1938 | 1236.5596 | 1236.5380 | 0.0216  | 0 | (21) | 10      | 5 | K.IDCWSACVAR.C                   |
|    | AAM67072  |           | GAST1-like protein                                                          | A. thaliana | 438 |    |    | 525.8021 | 1249.5896 | 1249.5907 | -0.0011 | 1 | 28   | 1.8     | 1 | K.KIDCASACVAR.C                  |
|    | AAM67072  |           | GAST1-like protein                                                          | A. thaliana | 438 |    |    | 647.3043 | 1282.5940 | 1282.5965 | -0.0025 | 1 | 7    | 2.6e+02 | 8 | K.KIDCASACVAR.C                  |
|    | AAM67072  |           | GAST1-like protein                                                          | A. thaliana | 438 |    |    | 504.2220 | 1509.6442 | 1509.6453 | -0.0011 | 0 | (44) | 0.048   | 1 | K.COCYASLTHGGR.R                 |
|    | AAM67072  |           | GAST1-like protein                                                          | A. thaliana | 438 |    |    | 755.8294 | 1509.6442 | 1509.6453 | -0.0010 | 0 | (67) | 0.0023  | 1 | K.COCYASLTHGGR.R                 |
|    | AAM67072  |           | GAST1-like protein                                                          | A. thaliana | 438 |    |    | 755.8294 | 1509.6442 | 1509.6453 | -0.0010 | 0 | 80   | 0.0012  | 1 | K.COCYASLTHGGR.R                 |
|    | AAM67072  |           | GAST1-like protein                                                          | A. thaliana | 438 |    |    | 755.8295 | 1509.6444 | 1509.6453 | -0.0008 | 0 | (69) | 0.0014  | 1 | K.COCYASLTHGGR.R                 |
|    | AAM67072  |           | GAST1-like protein                                                          | A. thaliana | 438 |    |    | 504.2221 | 1509.6445 | 1509.6453 | -0.0008 | 0 | (62) | 0.0075  | 1 | K.COCYASLTHGGR.R                 |
|    | AAM67072  |           | GAST1-like protein                                                          | A. thaliana | 438 |    |    | 504.2221 | 1509.6445 | 1509.6453 | -0.0008 | 0 | (65) | 0.0038  | 1 | K.COCYASLTHGGR.R                 |
|    | AAM67072  |           | GAST1-like protein                                                          | A. thaliana | 438 |    |    | 755.8298 | 1509.6450 | 1509.6453 | -0.0002 | 0 | (65) | 0.0032  | 1 | K.COCYASLTHGGR.R                 |
|    | AAM67072  |           | GAST1-like protein                                                          | A. thaliana | 438 |    |    | 822.8421 | 1643.6696 | 1643.6708 | -0.0012 | 0 | (47) | 0.02    | 1 | R.CNCPVPGTYGNYDK.C               |
|    | AAM67072  |           | GAST1-like protein                                                          | A. thaliana | 438 |    |    | 822.8423 | 1643.6700 | 1643.6708 | -0.0008 | 0 | 56   | 0.0024  | 1 | R.CNCPVPGTYGNYDK.C               |
|    | AAM67072  |           | GAST1-like protein                                                          | A. thaliana | 438 |    |    | 822.8425 | 1643.6704 | 1643.6708 | -0.0004 | 0 | (15) | 27      | 1 | R.CNCPVPGTYGNYDK.C               |
|    | AAM67072  |           | GAST1-like protein                                                          | A. thaliana | 438 |    |    | 822.8425 | 1643.6704 | 1643.6708 | -0.0004 | 0 | (40) | 0.098   | 1 | R.CNCPVPGTYGNYDK.C               |
| 14 | NP_178321 | AT2G02130 | LCR68/PDF2.3 (Low-molecular-weight cysteine-rich 68); protease inhibitor    | A. thaliana | 117 | 2  | 31 | 786.9957 | 2357.9653 | 2357.9689 | -0.0036 | 0 | (62) | 0.0034  | 1 | K.GPCVSTHNCANVCHNEGFGGGK.C       |
|    | NP_178321 |           | LCR68/PDF2.3 (Low-molecular-weight cysteine-rich 68); protease inhibitor    | A. thaliana | 117 |    |    | 786.9970 | 2357.9662 | 2357.9689 | 0.0003  | 0 | 59   | 0.0083  | 1 | K.GPCVSTHNCANVCHNEGFGGGK.C       |
|    | NP_178321 |           | LCR68/PDF2.3 (Low-molecular-weight cysteine-rich 68); protease inhibitor    | A. thaliana | 117 |    |    | 590.4998 | 2357.9701 | 2357.9689 | 0.0012  | 0 | (12) | 35      | 1 | K.GPCVSTHNCANVCHNEGFGGGK.C       |
|    | NP_178321 |           | LCR68/PDF2.3 (Low-molecular-weight cysteine-rich 68); protease inhibitor    | A. thaliana | 117 |    |    | 659.2899 | 2633.1305 | 2633.1322 | -0.0017 | 1 | (37) | 0.11    | 1 | R.FKGPCVSTHNCANVCHNEGFGGGK.C     |
|    | NP_178321 |           | LCR68/PDF2.3 (Low-molecular-weight cysteine-rich 68); protease inhibitor    | A. thaliana | 117 |    |    | 659.2899 | 2633.1305 | 2633.1322 | -0.0017 | 1 | (38) | 0.086   | 1 | R.FKGPCVSTHNCANVCHNEGFGGGK.C     |
|    | NP_178321 |           | LCR68/PDF2.3 (Low-molecular-weight cysteine-rich 68); protease inhibitor    | A. thaliana | 117 |    |    | 878.7176 | 2633.1310 | 2633.1322 | -0.0013 | 1 | 58   | 0.00076 | 1 | R.FKGPCVSTHNCANVCHNEGFGGGK.C     |
| 14 | NP_178319 | AT2G02100 | LCR69/PDF2.2 (Low-molecular-weight cysteine-rich 69); protease inhibitor    | A. thaliana | 108 | 2  | 41 | 450.2020 | 898.3894  | 898.3902  | -0.0007 | 1 | (18) | 17      | 3 | R.RFCFCTR.H                      |
|    | NP_178319 |           | LCR69/PDF2.2 (Low-molecular-weight cysteine-rich 69); protease inhibitor    | A. thaliana | 108 |    |    | 450.2021 | 898.3896  | 898.3902  | -0.0005 | 1 | (17) | 21      | 4 | R.RFCFCTR.H                      |
|    | NP_178319 |           | LCR69/PDF2.2 (Low-molecular-weight cysteine-rich 69); protease inhibitor    | A. thaliana | 108 |    |    | 450.2023 | 898.3900  | 898.3902  | -0.0001 | 1 | 19   | 15      | 4 | R.RFCFCTR.H                      |
|    | NP_178319 |           | LCR69/PDF2.2 (Low-molecular-weight cysteine-rich 69); protease inhibitor    | A. thaliana | 108 |    |    | 968.0801 | 2901.2185 | 2901.2164 | 0.0021  | 1 | 90   | 5.1e-07 | 1 | R.FKPGTCVSNANVCHNEGFVGGNCR.G     |
|    | NP_178319 |           | LCR69/PDF2.2 (Low-molecular-weight cysteine-rich 69); protease inhibitor    | A. thaliana | 108 |    |    | 726.3120 | 2901.2189 | 2901.2164 | 0.0025  | 1 | (54) | 0.0019  | 1 | R.FKPGTCVSNANVCHNEGFVGGNCR.G     |
| 14 | NP_188456 | AT3G18280 | protease inhibitor/seed storage/lipid transfer protein (LTP) family protein | A. thaliana | 103 | 4  | 31 | 446.2372 | 890.4598  | 890.4610  | -0.0012 | 0 | (58) | 0.40    | 1 | R.FVSTPNAR.K                     |
|    | NP_188456 |           | protease inhibitor/seed storage/lipid transfer protein (LTP) family protein | A. thaliana | 103 |    |    | 446.2375 | 890.4604  | 890.4610  | -0.0006 | 0 | 35   | 0.44    | 1 | R.FVSTPNAR.K                     |
|    | NP_188456 |           | protease inhibitor/seed storage/lipid transfer protein (LTP) family protein | A. thaliana | 103 |    |    | 446.2375 | 890.4604  | 890.4610  | -0.0006 | 0 | (34) | 0.64    | 1 | R.FVSTPNAR.K                     |
|    | NP_188456 |           | protease inhibitor/seed storage/lipid transfer protein (LTP) family protein | A. thaliana | 103 |    |    | 446.2377 | 890.4608  | 890.4610  | -0.0002 | 0 | (28) | 2.2     | 1 | R.FVSTPNAR.K                     |
|    | NP_188456 |           | protease inhibitor/seed storage/lipid transfer protein (LTP) family protein | A. thaliana | 103 |    |    | 485.7792 | 969.5438  | 969.5430  | 0.0009  | 1 | 16   | 29      | 3 | K.SCKLPPR.C                      |
|    | NP_188456 |           | protease inhibitor/seed storage/lipid transfer protein (LTP) family protein | A. thaliana | 103 |    |    | 524.2872 | 1046.5598 | 1046.5621 | -0.0023 | 1 | 36   | 0.44    | 1 | R.RFVSTPNAR.K                    |
|    | NP_188456 |           | protease inhibitor/seed storage/lipid transfer protein (LTP) family protein | A. thaliana | 103 |    |    | 524.2878 | 1046.5610 | 1046.5621 | -0.0011 | 1 | (31) | 1.3     | 1 | R.RFVSTPNAR.K                    |
|    | NP_188456 |           | protease inhibitor/seed storage/lipid transfer protein (LTP) family protein | A. thaliana | 103 |    |    | 524.2878 | 1046.5610 | 1046.5621 | -0.0011 | 1 | (35) | 0.46    | 1 | R.RFVSTPNAR.K                    |
|    | NP_188456 |           | protease inhibitor/seed storage/lipid transfer protein (LTP) family protein | A. thaliana | 103 |    |    | 524.2880 | 1046.5614 | 1046.5621 | -0.0007 | 1 | (32) | 0.96    | 2 | R.RFVSTPNAR.K                    |
|    | NP_188456 |           | protease inhibitor/seed storage/lipid transfer protein (LTP) family protein | A. thaliana | 103 |    |    | 524.2881 | 1046.5616 | 1046.5621 | -0.0005 | 1 | (21) | 13      | 4 | R.RFVSTPNAR.K                    |
|    | NP_188456 |           | protease inhibitor/seed storage/lipid transfer protein (LTP) family protein | A. thaliana | 103 |    |    | 524.2887 | 1046.5628 | 1046.5621 | 0.0007  | 1 | (17) | 31      | 6 | R.RFVSTPNAR.K                    |
|    | NP_188456 |           | protease inhibitor/seed storage/lipid transfer protein (LTP) family protein | A. thaliana | 103 |    |    | 576.2777 | 1725.8113 | 1725.8113 | -0.0000 | 1 | 16   | 22      | 1 | K.LKEORPCLCYMR.N + Oxidation (M) |
| 29 | NP_179235 | AT2G16430 | ATPAP10/PAP10; acid phosphatase/ protein serine/threonine phosphatase       | A. thaliana | 877 | 20 | 53 | 322.1635 | 642.3124  | 642.3125  | -0.0001 | 0 | (19) | 16      | 1 | K.YSAFR.E                        |
|    | NP_179235 |           | ATPAP10/PAP10; acid phosphatase/ protein serine/threonine phosphatase       | A. thaliana | 877 |    |    | 322.1635 | 642.3124  | 642.3125  | -0.0001 | 0 | 23   | 7.5     | 1 | K.YSAFR.E                        |
|    | NP_179235 |           | ATPAP10/PAP10; acid phosphatase/ protein serine/threonine phosphatase       | A. thaliana | 877 |    |    | 322.1635 | 642.3124  | 642.3125  | -0.0001 | 0 | (21) | 10      | 1 | K.YSAFR.E                        |
|    | NP_179235 |           | ATPAP10/PAP10; acid phosphatase/ protein serine/threonine phosphatase       | A. thaliana | 877 |    |    | 322.1635 | 642.3124  | 642.3125  | -0.0001 | 0 | (18) | 22      | 1 | K.YSAFR.E                        |
|    | NP_179235 |           | ATPAP10/PAP10; acid phosphatase/ protein serine/threonine phosphatase       | A. thaliana | 877 |    |    | 403.6825 | 805.3504  | 805.3507  | -0.0003 | 0 | (20) | 17      | 1 | R.WDSWGR.F                       |
|    | NP_179235 |           | ATPAP10/PAP10; acid phosphatase/ protein serine/threonine phosphatase       | A. thaliana | 877 |    |    | 403.6825 | 805.3504  | 805.3507  | -0.0003 | 0 | (19) | 23      | 1 | R.WDSWGR.F                       |
|    | NP_179235 |           | ATPAP10/PAP10; acid phosphatase/ protein serine/threonine phosphatase       | A. thaliana | 877 |    |    | 403.6826 | 805.3506  | 805.3507  | -0.0001 | 0 | 20   | 15      | 1 | R.WDSWGR.F                       |
|    | NP_179235 |           | ATPAP10/PAP10; acid phosphatase/ protein serine/threonine phosphatase       | A. thaliana | 877 |    |    | 415.7074 | 829.4002  | 829.4004  | -0.0001 | 0 | (19) | 27      | 1 | K.MTEPQPK.Y                      |
|    | NP_179235 |           | ATPAP10/PAP10; acid phosphatase/ protein serine/threonine phosphatase       | A. thaliana | 877 |    |    | 415.7074 | 829.4002  | 829.4004  | -0.0001 | 0 | 26   | 5.7     | 1 | K.MTEPQPK.Y                      |
|    | NP_179235 |           | ATPAP10/PAP10; acid phosphatase/ protein serine/threonine phosphatase       | A. thaliana | 877 |    |    | 415.7074 | 829.4002  | 829.4004  | -0.0001 | 0 | (19) | 27      | 1 | K.MTEPQPK.Y                      |
|    | NP_179235 |           | ATPAP10/PAP10; acid phosphatase/ protein serine/threonine phosphatase       | A. thaliana | 877 |    |    | 415.7074 | 829.4002  | 829.4004  | -0.0001 | 0 | (19) | 24      | 1 | K.MTEPQPK.Y                      |
|    | NP_179235 |           | ATPAP10/PAP10; acid phosphatase/ protein serine/threonine phosphatase       | A. thaliana | 877 |    |    | 415.7076 | 829.4006  | 829.4004  | 0.0003  | 0 | (18) | 34      | 1 | K.MTEPQPK.Y                      |
|    | NP_179235 |           | ATPAP10/PAP10; acid phosphatase/ protein serine/threonine phosphatase       | A. thaliana | 877 |    |    | 441.7135 | 881.4124  | 881.4130  | -0.0006 | 0 | (18) | 17      | 1 | R.NLEVDTK.Y                      |
|    | NP_179235 |           | ATPAP10/PAP10; acid phosphatase/ protein serine/threonine phosphatase       | A. thaliana | 877 |    |    | 441.7135 | 881.4124  | 881.4130  | -0.0006 | 0 | (23) | 6.1     | 1 | R.NLEVDTK.Y                      |
|    | NP_179235 |           | ATPAP10/PAP10; acid phosphatase/ protein serine/threonine phosphatase       | A. thaliana | 877 |    |    | 441.7138 | 881.4126  | 881.4130  | -0.0004 | 0 | (21) | 9.5     | 1 | R.NLEVDTK.Y                      |
|    | NP_179235 |           | ATPAP10/PAP10; acid phosphatase/ protein serine/threonine phosphatase       | A. thaliana | 877 |    |    | 441.7138 | 881.4126  | 881.4130  | -0.0004 | 0 | (23) | 6.1     | 1 | R.NLEVDTK.Y                      |
|    | NP_179235 |           | ATPAP10/PAP10; acid phosphatase/ protein serine/threonine phosphatase       | A. thaliana | 877 |    |    | 441.7138 | 881.4126  | 881.4130  | -0.0004 | 0 | 24   | 3.9     | 1 | R.NLEVDTK.Y                      |
|    | NP_179235 |           | ATPAP10/PAP10; acid phosphatase/ protein serine/threonine phosphatase       | A. thaliana | 877 |    |    | 441.7137 | 881.4128  | 881.4130  | -0.0002 | 0 | (20) | 11      | 2 | R.NLEVDTK.Y                      |
|    | NP_179235 |           | ATPAP10/PAP10; acid phosphatase/ protein serine/threonine phosphatase       | A. thaliana | 877 |    |    | 466.7076 | 931.4006  | 931.4010  | -0.0004 | 0 | 34   | 0.54    | 1 | R.MWFYNR.F + Oxidation (M)       |
|    | NP_179235 |           | ATPAP10/PAP10; acid phosphatase/ protein serine/threonine phosphatase       | A. thaliana | 877 |    |    | 466.7076 | 931.4006  | 931.4010  | -0.0004 | 0 | (30) | 1.3     | 1 | R.MWFYNR.F + Oxidation (M)       |
|    | NP_179235 |           | ATPAP10/PAP10; acid phosphatase/ protein serine/threonine phosphatase       | A. thaliana | 877 |    |    | 466.7076 | 931.4006  | 931.4010  | -0.0004 | 0 | (32) | 0.83    | 1 | R.MWFYNR.F + Oxidation (M)       |
|    | NP_179235 |           | ATPAP10/PAP10; acid phosphatase/ protein serine/threonine phosphatase       | A. thaliana | 877 |    |    | 466.7077 | 931.4008  | 931.4010  | -0.0002 | 0 | (34) | 0.56    | 1 | R.MWFYNR.F + Oxidation (M)       |
|    | NP_179235 |           | ATPAP10/PAP10; acid phosphatase/ protein serine/threonine phosphatase       | A. thaliana | 877 |    |    | 582.7756 | 1163.5366 | 1163.5373 | -0.0007 | 0 | (31) | 1.2     | 1 | R.THAYGWHR.N                     |
|    | NP_179235 |           | ATPAP10/PAP10; acid phosphatase/ protein serine/threonine phosphatase       | A. thaliana | 877 |    |    | 388.8529 | 1163.5369 | 1163.5373 | -0.0004 | 0 | (36) | 0.35    | 1 | R.THAYGWHR.N                     |
|    | NP_179235 |           | ATPAP10/PAP10; acid phosphatase/ protein serine/threonine phosphatase       | A. thaliana | 877 |    |    | 582.7759 | 1163.5372 | 1163.5373 | -0.0001 | 0 | (38) | 0.21    | 1 | R.THAYGWHR.N                     |
|    | NP_179235 |           | ATPAP10/PAP10; acid phosphatase/ protein serine/threonine phosphatase       | A. thaliana | 877 |    |    |          |           |           |         |   |      |         |   |                                  |

|           |          |                                                                       |                                             |             |     |    |           |           |           |          |         |      |         |    |                           |           |
|-----------|----------|-----------------------------------------------------------------------|---------------------------------------------|-------------|-----|----|-----------|-----------|-----------|----------|---------|------|---------|----|---------------------------|-----------|
| NP 179235 |          | ATPAP10/PAP10; acid phosphatase/ protein serine/threonine phosphatase | A. thaliana                                 | 877         |     |    | 616.7676  | 1231.5206 | 1231.5218 | -0.0011  | 0       | 42   | 0.083   | 1  | R.NHDGYAVEGDR.M           |           |
| NP 179235 |          | ATPAP10/PAP10; acid phosphatase/ protein serine/threonine phosphatase | A. thaliana                                 | 877         |     |    | 616.7677  | 1231.5208 | 1231.5218 | -0.0009  | 0       | (33) | 0.53    | 1  | R.NHDGYAVEGDR.M           |           |
| NP 179235 |          | ATPAP10/PAP10; acid phosphatase/ protein serine/threonine phosphatase | A. thaliana                                 | 877         |     |    | 616.7678  | 1231.5210 | 1231.5218 | -0.0007  | 0       | (34) | 0.45    | 1  | R.NHDGYAVEGDR.M           |           |
| NP 179235 |          | ATPAP10/PAP10; acid phosphatase/ protein serine/threonine phosphatase | A. thaliana                                 | 877         |     |    | 616.7678  | 1231.5210 | 1231.5218 | -0.0007  | 0       | (35) | 0.42    | 1  | R.NHDGYAVEGDR.M           |           |
| NP 179235 |          | ATPAP10/PAP10; acid phosphatase/ protein serine/threonine phosphatase | A. thaliana                                 | 877         |     |    | 411.5143  | 1231.5211 | 1231.5218 | -0.0007  | 0       | (25) | 3.5     | 2  | R.NHDGYAVEGDR.M           |           |
| NP 179235 |          | ATPAP10/PAP10; acid phosphatase/ protein serine/threonine phosphatase | A. thaliana                                 | 877         |     |    | 616.7679  | 1231.5212 | 1231.5218 | -0.0005  | 0       | (29) | 1.4     | 1  | R.NHDGYAVEGDR.M           |           |
| NP 179235 |          | ATPAP10/PAP10; acid phosphatase/ protein serine/threonine phosphatase | A. thaliana                                 | 877         |     |    | 616.7679  | 1231.5212 | 1231.5218 | -0.0005  | 0       | (40) | 0.11    | 1  | R.NHDGYAVEGDR.M           |           |
| NP 179235 |          | ATPAP10/PAP10; acid phosphatase/ protein serine/threonine phosphatase | A. thaliana                                 | 877         |     |    | 411.5144  | 1231.5214 | 1231.5218 | -0.0004  | 0       | (26) | 2.7     | 2  | R.NHDGYAVEGDR.M           |           |
| NP 179235 |          | ATPAP10/PAP10; acid phosphatase/ protein serine/threonine phosphatase | A. thaliana                                 | 877         |     |    | 616.7680  | 1231.5214 | 1231.5218 | -0.0003  | 0       | (30) | 1.3     | 1  | R.NHDGYAVEGDR.M           |           |
| NP 179235 |          | ATPAP10/PAP10; acid phosphatase/ protein serine/threonine phosphatase | A. thaliana                                 | 877         |     |    | 436.2305  | 1305.6997 | 1305.6717 | -0.0021  | 0       | (10) | 1e+02   | 6  | R.EASF6HAFISIK.N          |           |
| NP 179235 |          | ATPAP10/PAP10; acid phosphatase/ protein serine/threonine phosphatase | A. thaliana                                 | 877         |     |    | 653.8423  | 1305.6700 | 1305.6717 | -0.0017  | 0       | (49) | 0.013   | 1  | R.EASF6HAFISIK.N          |           |
| NP 179235 |          | ATPAP10/PAP10; acid phosphatase/ protein serine/threonine phosphatase | A. thaliana                                 | 877         |     |    | 436.2309  | 1305.6709 | 1305.6717 | -0.0008  | 0       | (7)  | 2.4e+02 | 10 | R.EASF6HAFISIK.N          |           |
| NP 179235 |          | ATPAP10/PAP10; acid phosphatase/ protein serine/threonine phosphatase | A. thaliana                                 | 877         |     |    | 653.8428  | 1305.6710 | 1305.6717 | -0.0007  | 0       | (39) | 0.13    | 1  | R.EASF6HAFISIK.N          |           |
| NP 179235 |          | ATPAP10/PAP10; acid phosphatase/ protein serine/threonine phosphatase | A. thaliana                                 | 877         |     |    | 653.8429  | 1305.6712 | 1305.6717 | -0.0005  | 0       | (50) | 0.011   | 1  | R.EASF6HAFISIK.N          |           |
| NP 179235 |          | ATPAP10/PAP10; acid phosphatase/ protein serine/threonine phosphatase | A. thaliana                                 | 877         |     |    | 653.8433  | 1305.6720 | 1305.6717 | 0.0003   | 0       | (38) | 0.17    | 1  | R.EASF6HAFISIK.N          |           |
| NP 179235 |          | ATPAP10/PAP10; acid phosphatase/ protein serine/threonine phosphatase | A. thaliana                                 | 877         |     |    | 653.8433  | 1305.6720 | 1305.6717 | 0.0003   | 0       | (42) | 0.076   | 1  | R.EASF6HAFISIK.N          |           |
| NP 179235 |          | ATPAP10/PAP10; acid phosphatase/ protein serine/threonine phosphatase | A. thaliana                                 | 877         |     |    | 685.8711  | 1329.7278 | 1329.7292 | -0.0016  | 0       | (55) | 0.0032  | 1  | K.AVIVSWYTOEAK.G          |           |
| NP 179235 |          | ATPAP10/PAP10; acid phosphatase/ protein serine/threonine phosphatase | A. thaliana                                 | 877         |     |    | 685.8716  | 1329.7285 | 1329.7292 | -0.0006  | 0       | (62) | 0.00064 | 1  | K.AVIVSWYTOEAK.G          |           |
| NP 179235 |          | ATPAP10/PAP10; acid phosphatase/ protein serine/threonine phosphatase | A. thaliana                                 | 877         |     |    | 685.8724  | 1329.7302 | 1329.7292 | 0.0010   | 0       | (54) | 0.0044  | 1  | K.AVIVSWYTOEAK.G          |           |
| NP 179235 |          | ATPAP10/PAP10; acid phosphatase/ protein serine/threonine phosphatase | A. thaliana                                 | 877         |     |    | 685.8725  | 1329.7304 | 1329.7292 | 0.0012   | 0       | 83   | 0.00053 | 1  | K.AVIVSWYTOEAK.G          |           |
| NP 179235 |          | ATPAP10/PAP10; acid phosphatase/ protein serine/threonine phosphatase | A. thaliana                                 | 877         |     |    | 724.3635  | 1446.7124 | 1446.7143 | -0.0019  | 0       | (51) | 0.0088  | 1  | K.YVVVLGVGQTER.K          |           |
| NP 179235 |          | ATPAP10/PAP10; acid phosphatase/ protein serine/threonine phosphatase | A. thaliana                                 | 877         |     |    | 724.3640  | 1446.7134 | 1446.7143 | -0.0009  | 0       | 84   | 0.00046 | 1  | K.YVVVLGVGQTER.K          |           |
| NP 179235 |          | ATPAP10/PAP10; acid phosphatase/ protein serine/threonine phosphatase | A. thaliana                                 | 877         |     |    | 744.8533  | 1487.6920 | 1487.6933 | -0.0012  | 0       | (47) | 0.02    | 1  | R.SGSEFPFYWSIK.R          |           |
| NP 179235 |          | ATPAP10/PAP10; acid phosphatase/ protein serine/threonine phosphatase | A. thaliana                                 | 877         |     |    | 744.8534  | 1487.6922 | 1487.6933 | -0.0010  | 0       | 50   | 0.012   | 1  | R.SGSEFPFYWSIK.R          |           |
| NP 179235 |          | ATPAP10/PAP10; acid phosphatase/ protein serine/threonine phosphatase | A. thaliana                                 | 877         |     |    | 744.8535  | 1487.6924 | 1487.6933 | -0.0008  | 0       | (48) | 0.016   | 1  | R.SGSEFPFYWSIK.R          |           |
| NP 179235 |          | ATPAP10/PAP10; acid phosphatase/ protein serine/threonine phosphatase | A. thaliana                                 | 877         |     |    | 774.3140  | 1546.6134 | 1546.6147 | -0.0013  | 0       | (31) | 0.69    | 1  | R.FWHVPDPSFCNS.-          |           |
| NP 179235 |          | ATPAP10/PAP10; acid phosphatase/ protein serine/threonine phosphatase | A. thaliana                                 | 877         |     |    | 774.3143  | 1546.6140 | 1546.6147 | -0.0007  | 0       | 33   | 0.42    | 1  | R.FWHVPDPSFCNS.-          |           |
| NP 179235 |          | ATPAP10/PAP10; acid phosphatase/ protein serine/threonine phosphatase | A. thaliana                                 | 877         |     |    | 774.3144  | 1546.6142 | 1546.6147 | -0.0005  | 0       | (30) | 0.89    | 1  | R.FWHVPDPSFCNS.-          |           |
| NP 179235 |          | ATPAP10/PAP10; acid phosphatase/ protein serine/threonine phosphatase | A. thaliana                                 | 877         |     |    | 533.6071  | 1597.7995 | 1597.8001 | -0.0007  | 0       | 21   | 8       | 1  | K.VDVVFAGHVHVER.S         |           |
| NP 179235 |          | ATPAP10/PAP10; acid phosphatase/ protein serine/threonine phosphatase | A. thaliana                                 | 877         |     |    | 915.0008  | 1827.9870 | 1827.9883 | -0.0012  | 1       | 72   | 6.6e-05 | 1  | K.RGPAYIVLASYSAGK.Y       |           |
| NP 179235 |          | ATPAP10/PAP10; acid phosphatase/ protein serine/threonine phosphatase | A. thaliana                                 | 877         |     |    | 915.0009  | 1827.9872 | 1827.9883 | -0.0010  | 1       | (62) | 0.00066 | 1  | K.RGPAYIVLASYSAGK.Y       |           |
| NP 179235 |          | ATPAP10/PAP10; acid phosphatase/ protein serine/threonine phosphatase | A. thaliana                                 | 877         |     |    | 610.3364  | 1827.9874 | 1827.9883 | -0.0009  | 1       | (33) | 0.54    | 1  | K.RVSNIAVWNGICTPKV.D      |           |
| NP 179235 |          | ATPAP10/PAP10; acid phosphatase/ protein serine/threonine phosphatase | A. thaliana                                 | 877         |     |    | 924.4871  | 1846.9596 | 1846.9611 | -0.0015  | 0       | 70   | 8.1e-05 | 1  | R.VSNIAVWNGICTPKV.D       |           |
| NP 179235 |          | ATPAP10/PAP10; acid phosphatase/ protein serine/threonine phosphatase | A. thaliana                                 | 877         |     |    | 924.4886  | 1846.9626 | 1846.9611 | 0.0015   | 0       | (61) | 0.0006  | 1  | R.VSNIAVWNGICTPKV.D       |           |
| NP 179235 |          | ATPAP10/PAP10; acid phosphatase/ protein serine/threonine phosphatase | A. thaliana                                 | 877         |     |    | 929.4384  | 1856.8622 | 1856.8621 | 0.0002   | 0       | (47) | 0.036   | 1  | K.YTPOYQWLEEFFP.V         |           |
| NP 179235 |          | ATPAP10/PAP10; acid phosphatase/ protein serine/threonine phosphatase | A. thaliana                                 | 877         |     |    | 929.4391  | 1856.8636 | 1856.8621 | 0.0016   | 0       | 56   | 0.0039  | 1  | K.YTPOYQWLEEFFP.V         |           |
| NP 179235 |          | ATPAP10/PAP10; acid phosphatase/ protein serine/threonine phosphatase | A. thaliana                                 | 877         |     |    | 1110.0600 | 2218.1054 | 2218.1117 | -0.0063  | 0       | (64) | 0.00027 | 1  | K.DQSPAPYITIGDGNIEGLATK.M |           |
| NP 179235 |          | ATPAP10/PAP10; acid phosphatase/ protein serine/threonine phosphatase | A. thaliana                                 | 877         |     |    | 1110.0620 | 2218.1094 | 2218.1117 | -0.0023  | 0       | (65) | 0.00023 | 1  | K.DQSPAPYITIGDGNIEGLATK.M |           |
| NP 179235 |          | ATPAP10/PAP10; acid phosphatase/ protein serine/threonine phosphatase | A. thaliana                                 | 877         |     |    | 1110.0630 | 2218.1114 | 2218.1117 | 0.0003   | 0       | (66) | 0.00017 | 1  | K.DQSPAPYITIGDGNIEGLATK.M |           |
| NP 179235 |          | ATPAP10/PAP10; acid phosphatase/ protein serine/threonine phosphatase | A. thaliana                                 | 877         |     |    | 740.3781  | 2218.1125 | 2218.1117 | 0.0007   | 0       | 71   | 4.7e-05 | 1  | K.DQSPAPYITIGDGNIEGLATK.M |           |
| NP 179235 |          | ATPAP10/PAP10; acid phosphatase/ protein serine/threonine phosphatase | A. thaliana                                 | 877         |     |    | 766.3702  | 2296.0888 | 2296.0907 | -0.0019  | 0       | 42   | 0.04    | 1  | R.PPCYGNAPQOIVHTGDVEGK.A  |           |
| NP 179235 |          | ATPAP10/PAP10; acid phosphatase/ protein serine/threonine phosphatase | A. thaliana                                 | 877         |     |    | 766.3702  | 2296.0888 | 2296.0907 | -0.0019  | 0       | (34) | 0.24    | 1  | R.PPCYGNAPQOIVHTGDVEGK.A  |           |
| NP 179235 |          | ATPAP10/PAP10; acid phosphatase/ protein serine/threonine phosphatase | A. thaliana                                 | 877         |     |    | 766.3703  | 2296.0891 | 2296.0907 | -0.0016  | 0       | (31) | 0.47    | 1  | R.PPCYGNAPQOIVHTGDVEGK.A  |           |
| NP 179235 |          | ATPAP10/PAP10; acid phosphatase/ protein serine/threonine phosphatase | A. thaliana                                 | 877         |     |    | 766.3705  | 2296.0897 | 2296.0907 | -0.0010  | 0       | (40) | 0.055   | 1  | R.PPCYGNAPQOIVHTGDVEGK.A  |           |
| NP 179235 |          | ATPAP10/PAP10; acid phosphatase/ protein serine/threonine phosphatase | A. thaliana                                 | 877         |     |    | 870.4169  | 2608.2289 | 2608.2306 | -0.0018  | 1       | (75) | 1.8e-05 | 1  | K.GQAVLFGVDSIADYTPHDNRN.R |           |
| NP 179235 |          | ATPAP10/PAP10; acid phosphatase/ protein serine/threonine phosphatase | A. thaliana                                 | 877         |     |    | 870.4169  | 2608.2289 | 2608.2306 | -0.0018  | 1       | 76   | 1.3e-05 | 1  | K.GQAVLFGVDSIADYTPHDNRN.R |           |
| NP 179235 |          | ATPAP10/PAP10; acid phosphatase/ protein serine/threonine phosphatase | A. thaliana                                 | 877         |     |    | 653.0652  | 2608.2317 | 2608.2306 | 0.0011   | 1       | (62) | 0.0036  | 1  | K.GQAVLFGVDSIADYTPHDNRN.R |           |
| 30        | AAF69828 | AT5G06870                                                             | GP2; polygalacturonase inhibiting protein 2 | A. thaliana | 831 | 16 | 55        | 302.1764  | 602.3382  | 602.3388 | -0.0005 | 0    | (32)    | 2  | 1                         | R.IDLSR.N |
| AAF69828  |          | GP2; polygalacturonase inhibiting protein 2                           | A. thaliana                                 | 831         |     |    | 302.1765  | 602.3384  | 602.3388  | -0.0003  | 0       | (28) | 4.8     | 1  | R.IDLSR.N                 |           |
| AAF69828  |          | GP2; polygalacturonase inhibiting protein 2                           | A. thaliana                                 | 831         |     |    | 302.1765  | 602.3384  | 602.3388  | -0.0003  | 0       | (26) | 6.7     | 1  | R.IDLSR.N                 |           |
| AAF69828  |          | GP2; polygalacturonase inhibiting protein 2                           | A. thaliana                                 | 831         |     |    | 302.1765  | 602.3384  | 602.3388  | -0.0003  | 0       | (25) | 8.4     | 1  | R.IDLSR.N                 |           |
| AAF69828  |          | GP2; polygalacturonase inhibiting protein 2                           | A. thaliana                                 | 831         |     |    | 302.1765  | 602.3384  | 602.3388  | -0.0003  | 0       | 32   | 1.9     | 1  | R.IDLSR.N                 |           |
| AAF69828  |          | GP2; polygalacturonase inhibiting protein 2                           | A. thaliana                                 | 831         |     |    | 302.1766  | 602.3386  | 602.3388  | -0.0001  | 0       | (25) | 8.8     | 1  | R.IDLSR.N                 |           |
| AAF69828  |          | GP2; polygalacturonase inhibiting protein 2                           | A. thaliana                                 | 831         |     |    | 382.2265  | 762.4384  | 762.4388  | -0.0004  | 0       | (31) | 1.3     | 1  | K.NLTLR.L                 |           |
| AAF69828  |          | GP2; polygalacturonase inhibiting protein 2                           | A. thaliana                                 | 831         |     |    | 382.2267  | 762.4388  | 762.4388  | 0.0000   | 0       | (29) | 2       | 1  | K.NLTLR.L                 |           |
| AAF69828  |          | GP2; polygalacturonase inhibiting protein 2                           | A. thaliana                                 | 831         |     |    | 382.2270  | 762.4394  | 762.4388  | 0.0006   | 0       | 32   | 1.1     | 2  | K.NLTLR.L                 |           |
| AAF69828  |          | GP2; polygalacturonase inhibiting protein 2                           | A. thaliana                                 | 831         |     |    | 383.1978  | 764.3810  | 764.3817  | -0.0006  | 0       | (24) | 6.5     | 1  | K.GEYQRF.F                |           |
| AAF69828  |          | GP2; polygalacturonase inhibiting protein 2                           | A. thaliana                                 | 831         |     |    | 383.1980  | 764.3814  | 764.3817  | -0.0002  | 0       | (22) | 9.2     | 2  | K.GEYQRF.F                |           |
| AAF69828  |          | GP2; polygalacturonase inhibiting protein 2                           | A. thaliana                                 | 831         |     |    | 383.1981  | 764.3816  | 764.3817  | -0.0000  | 0       | 27   | 3.4     | 2  | K.GEYQRF.F                |           |
| AAF69828  |          | GP2; polygalacturonase inhibiting protein 2                           | A. thaliana                                 | 831         |     |    | 383.1982  | 764.3818  | 764.3817  | 0.0002   | 0       | (23) | 7.4     | 5  | K.GEYQRF.F                |           |
| AAF69828  |          | GP2; polygalacturonase inhibiting protein 2                           | A. thaliana                                 | 831         |     |    | 383.1983  | 764.3820  | 764.3817  | 0.0004   | 0       | (22) | 8.9     | 3  | K.GEYQRF.F                |           |
| AAF69828  |          | GP2; polygalacturonase inhibiting protein 2                           | A. thaliana                                 | 831         |     |    | 467.2656  | 932.5166  | 932.5179  | -0.0012  | 1       | (23) | 7       | 2  | K.DDKTTLK.I               |           |
| AAF69828  |          | GP2; polygalacturonase inhibiting protein 2                           | A. thaliana                                 | 831         |     |    | 467.2658  | 932.5170  | 932.5179  | -0.0008  | 1       | 27   | 3       | 1  | K.DDKTTLK.I               |           |
| AAF69828  |          | GP2; polygalacturonase inhibiting protein 2                           | A. thaliana                                 | 831         |     |    | 511.7795  | 1021.5444 | 1021.5444 | 0.0001   | 0       | 49   | 0.017   | 1  | K.LEVLELSR.N              |           |
| AAF69828  |          | GP2; polygalacturonase inhibiting protein 2                           | A. thaliana                                 | 831         |     |    | 534.7585  | 1067.5024 | 1067.5036 | -0.0012  | 0       | (27) | 2.1     | 1  | K.SLGNPQFY.R              |           |
| AAF69828  |          | GP2; polygalacturonase inhibiting protein 2                           | A. thaliana                                 | 831         |     |    | 534.7586  | 1067.5026 | 1067.5036 | -0.0010  | 0       | 56   | 0.0028  | 1  | K.SLGNPQFY.R              |           |
| AAF69828  |          | GP2; polygalacturonase inhibiting protein 2                           | A. thaliana                                 | 831         |     |    | 534.7587  | 1067.5028 | 1067.5036 | -0.0008  | 0       | (40) | 0.1     | 1  | K.SLGNPQFY.R              |           |
| AAF69828  |          | GP2; polygalacturonase inhibiting protein 2                           | A. thaliana                                 | 831         |     |    | 534.7587  | 1067.5028 | 1067.5036 | -0.0008  | 0       | (43) | 0.051   | 1  | K.SLGNPQFY.R              |           |
| AAF69828  |          | GP2; polygalacturonase inhibiting protein 2                           | A. thaliana                                 | 831         |     |    | 534.7588  | 1067.5030 | 1067.5036 | -0.0006  | 0       | (41) | 0.077   | 1  | K.SLGNPQFY.R              |           |
| AAF69828  |          | GP2; polygalacturonase inhibiting protein 2                           | A. thaliana                                 | 831         |     |    | 534.7589  | 1067.5032 | 1067.5036 | -0.0004  | 0       | (25) | 3.5     | 1  | K.SLGNPQFY.R              |           |
| AAF69828  |          | GP2; polygalacturonase inhibiting protein 2                           | A. thaliana                                 | 831         |     |    | 534.7590  | 1067.5034 | 1067.5036 | -0.0002  | 0       | (54) | 0.0042  | 1  | K.SLGNPQFY.R              |           |
| AAF69828  |          | GP2; polygalacturonase inhibiting protein 2                           | A. thaliana                                 | 831         |     |    | 565.2707  | 1128.5268 | 1128.5274 | -0.0005  | 0       | (34) | 0.43    | 1  | R.MMFQDLSK.V              |           |
| AAF69828  |          | GP2; polygalacturonase inhibiting protein 2                           | A. thaliana                                 | 831         |     |    | 565.2708  | 1128.5270 | 1128.5274 | -0.0003  | 0       | (37) | 0.23    | 1  | R.MMFQDLSK.V              |           |
| AAF69828  |          | GP2; polygalacturonase inhibiting protein 2                           | A. thaliana                                 | 831         |     |    | 565.2712  | 1128.5278 | 1128.5274 | 0.0005   | 0       | (30) | 1.3     | 1  | R.MMFQDLSK.V              |           |
| AAF69828  |          | GP2; polygalacturonase inhibiting protein 2                           | A. thaliana                                 | 831         |     |    | 573.2677  | 1144.5208 | 1144.5223 | -0.0014  | 0       | (37) | 0.26    | 1  | R.MMFQDLS                 |           |

|          |           |                                               |                                                                             |             |     |           |           |           |           |           |         |         |      |                                     |   |                                   |
|----------|-----------|-----------------------------------------------|-----------------------------------------------------------------------------|-------------|-----|-----------|-----------|-----------|-----------|-----------|---------|---------|------|-------------------------------------|---|-----------------------------------|
| AAF69828 |           | PGIP2; polygalacturonase inhibiting protein 2 | A. thaliana                                                                 | 831         |     | 384.2202  | 1149.6388 | 1149.6393 | -0.0006   | 1         | (24)    | 4.1     | 4    | R.KLEYELSR.N                        |   |                                   |
| AAF69828 |           | PGIP2; polygalacturonase inhibiting protein 2 | A. thaliana                                                                 | 831         |     | 575.8268  | 1149.6390 | 1149.6393 | -0.0003   | 1         | (44)    | 0.049   | 1    | R.KLEYELSR.N                        |   |                                   |
| AAF69828 |           | PGIP2; polygalacturonase inhibiting protein 2 | A. thaliana                                                                 | 831         |     | 575.8269  | 1149.6392 | 1149.6393 | -0.0001   | 1         | (42)    | 0.068   | 1    | R.KLEYELSR.N                        |   |                                   |
| AAF69828 |           | PGIP2; polygalacturonase inhibiting protein 2 | A. thaliana                                                                 | 831         |     | 609.8455  | 1217.6764 | 1217.6768 | -0.0004   | 1         | 63      | 0.00054 | 1    | K.KTTVVWIDSR.N                      |   |                                   |
| AAF69828 |           | PGIP2; polygalacturonase inhibiting protein 2 | A. thaliana                                                                 | 831         |     | 610.3375  | 1218.6604 | 1218.6608 | -0.0004   | 0         | 52      | 0.0079  | 1    | K.LQGDSILFGAAK                      |   |                                   |
| AAF69828 |           | PGIP2; polygalacturonase inhibiting protein 2 | A. thaliana                                                                 | 831         |     | 610.3377  | 1218.6608 | 1218.6608 | 0.0000    | 0         | (48)    | 0.019   | 1    | K.LQGDSILFGAAK                      |   |                                   |
| AAF69828 |           | PGIP2; polygalacturonase inhibiting protein 2 | A. thaliana                                                                 | 831         |     | 610.3378  | 1218.6610 | 1218.6608 | 0.0002    | 0         | (46)    | 0.034   | 1    | K.LQGDSILFGAAK                      |   |                                   |
| AAF69828 |           | PGIP2; polygalacturonase inhibiting protein 2 | A. thaliana                                                                 | 831         |     | 610.3378  | 1218.6610 | 1218.6608 | 0.0002    | 0         | (44)    | 0.043   | 1    | K.LQGDSILFGAAK                      |   |                                   |
| AAF69828 |           | PGIP2; polygalacturonase inhibiting protein 2 | A. thaliana                                                                 | 831         |     | 610.3384  | 1218.6622 | 1218.6608 | 0.0014    | 0         | (43)    | 0.068   | 1    | K.LQGDSILFGAAK                      |   |                                   |
| AAF69828 |           | PGIP2; polygalacturonase inhibiting protein 2 | A. thaliana                                                                 | 831         |     | 610.3403  | 1218.6660 | 1218.6608 | 0.0052    | 0         | (41)    | 0.093   | 1    | K.LQGDSILFGAAK                      |   |                                   |
| AAF69828 |           | PGIP2; polygalacturonase inhibiting protein 2 | A. thaliana                                                                 | 831         |     | 631.7878  | 1261.5610 | 1261.5617 | -0.0007   | 0         | (53)    | 0.0055  | 1    | K.CLOGAPLPSCK-                      |   |                                   |
| AAF69828 |           | PGIP2; polygalacturonase inhibiting protein 2 | A. thaliana                                                                 | 831         |     | 631.7880  | 1261.5614 | 1261.5617 | -0.0003   | 0         | 56      | 0.0032  | 1    | K.CLOGAPLPSCK-                      |   |                                   |
| AAF69828 |           | PGIP2; polygalacturonase inhibiting protein 2 | A. thaliana                                                                 | 831         |     | 646.2899  | 1290.5652 | 1290.5669 | -0.0017   | 0         | (45)    | 0.051   | 1    | R.FDSYSFFHNK.C                      |   |                                   |
| AAF69828 |           | PGIP2; polygalacturonase inhibiting protein 2 | A. thaliana                                                                 | 831         |     | 431.1957  | 1290.5653 | 1290.5669 | -0.0017   | 0         | (24)    | 6.6     | 1    | R.FDSYSFFHNK.C                      |   |                                   |
| AAF69828 |           | PGIP2; polygalacturonase inhibiting protein 2 | A. thaliana                                                                 | 831         |     | 431.1958  | 1290.5656 | 1290.5669 | -0.0014   | 0         | (37)    | 0.29    | 1    | R.FDSYSFFHNK.C                      |   |                                   |
| AAF69828 |           | PGIP2; polygalacturonase inhibiting protein 2 | A. thaliana                                                                 | 831         |     | 646.2902  | 1290.5658 | 1290.5669 | -0.0011   | 0         | (41)    | 0.12    | 1    | R.FDSYSFFHNK.C                      |   |                                   |
| AAF69828 |           | PGIP2; polygalacturonase inhibiting protein 2 | A. thaliana                                                                 | 831         |     | 646.2902  | 1290.5658 | 1290.5669 | -0.0011   | 0         | 48      | 0.025   | 1    | R.FDSYSFFHNK.C                      |   |                                   |
| AAF69828 |           | PGIP2; polygalacturonase inhibiting protein 2 | A. thaliana                                                                 | 831         |     | 646.2904  | 1290.5662 | 1290.5669 | -0.0007   | 0         | (46)    | 0.035   | 1    | R.FDSYSFFHNK.C                      |   |                                   |
| AAF69828 |           | PGIP2; polygalacturonase inhibiting protein 2 | A. thaliana                                                                 | 831         |     | 646.2910  | 1290.5674 | 1290.5669 | 0.0005    | 0         | (43)    | 0.076   | 1    | R.FDSYSFFHNK.C                      |   |                                   |
| AAF69828 |           | PGIP2; polygalacturonase inhibiting protein 2 | A. thaliana                                                                 | 831         |     | 431.1965  | 1290.5677 | 1290.5669 | 0.0007    | 0         | (25)    | 5.4     | 1    | R.FDSYSFFHNK.C                      |   |                                   |
| AAF69828 |           | PGIP2; polygalacturonase inhibiting protein 2 | A. thaliana                                                                 | 831         |     | 769.3978  | 1536.7810 | 1536.7824 | -0.0014   | 0         | 57      | 0.0021  | 1    | K.LTGPPIPEFSTGSGK.V                 |   |                                   |
| AAF69828 |           | PGIP2; polygalacturonase inhibiting protein 2 | A. thaliana                                                                 | 831         |     | 769.3980  | 1536.7814 | 1536.7824 | -0.0010   | 0         | (51)    | 0.009   | 1    | K.LTGPPIPEFSTGSGK.V                 |   |                                   |
| AAF69828 |           | PGIP2; polygalacturonase inhibiting protein 2 | A. thaliana                                                                 | 831         |     | 769.3981  | 1536.7816 | 1536.7824 | -0.0008   | 0         | (46)    | 0.026   | 1    | K.LTGPPIPEFSTGSGK.V                 |   |                                   |
| AAF69828 |           | PGIP2; polygalacturonase inhibiting protein 2 | A. thaliana                                                                 | 831         |     | 769.3984  | 1536.7822 | 1536.7824 | -0.0002   | 0         | (25)    | 3.2     | 1    | K.LTGPPIPEFSTGSGK.V                 |   |                                   |
| AAF69828 |           | PGIP2; polygalacturonase inhibiting protein 2 | A. thaliana                                                                 | 831         |     | 919.5104  | 1837.0062 | 1837.0098 | -0.0035   | 0         | 61      | 0.00071 | 1    | K.VPSLFLSHNQLSGTIFP.K               |   |                                   |
| AAF69828 |           | PGIP2; polygalacturonase inhibiting protein 2 | A. thaliana                                                                 | 831         |     | 613.3430  | 1837.0072 | 1837.0098 | -0.0026   | 0         | (41)    | 0.08    | 1    | K.VPSLFLSHNQLSGTIFP.K               |   |                                   |
| AAF69828 |           | PGIP2; polygalacturonase inhibiting protein 2 | A. thaliana                                                                 | 831         |     | 919.5109  | 1837.0072 | 1837.0098 | -0.0025   | 0         | (52)    | 0.0067  | 1    | K.VPSLFLSHNQLSGTIFP.K               |   |                                   |
| AAF69828 |           | PGIP2; polygalacturonase inhibiting protein 2 | A. thaliana                                                                 | 831         |     | 613.3435  | 1837.0087 | 1837.0098 | -0.0011   | 0         | (36)    | 0.27    | 1    | K.VPSLFLSHNQLSGTIFP.K               |   |                                   |
| AAF69828 |           | PGIP2; polygalacturonase inhibiting protein 2 | A. thaliana                                                                 | 831         |     | 613.3435  | 1837.0087 | 1837.0098 | -0.0011   | 0         | (36)    | 0.23    | 1    | K.VPSLFLSHNQLSGTIFP.K               |   |                                   |
| AAF69828 |           | PGIP2; polygalacturonase inhibiting protein 2 | A. thaliana                                                                 | 831         |     | 919.5127  | 1837.0108 | 1837.0098 | 0.0011    | 0         | (51)    | 0.0083  | 1    | K.VPSLFLSHNQLSGTIFP.K               |   |                                   |
| AAF69828 |           | PGIP2; polygalacturonase inhibiting protein 2 | A. thaliana                                                                 | 831         |     | 1314.1630 | 2626.3114 | 2626.3126 | -0.0011   | 0         | 100     | 5.3e-08 | 1    | K.NLEYDLSFNDLSGIPSSLSLR.K           |   |                                   |
| AAF69828 |           | PGIP2; polygalacturonase inhibiting protein 2 | A. thaliana                                                                 | 831         |     | 1124.2720 | 3369.7942 | 3369.8072 | -0.0130   | 0         | 73      | 1.8e-05 | 1    | R.VTSLIIOGDEISGQIPPEVGDLPYLTSLIFR.K |   |                                   |
| 32       | NP_188456 | AT3G18280                                     | protease inhibitor/seed storage/lipid transfer protein (LTP) family protein | A. thaliana | 128 | 5         | 31        | 446.2376  | 890.4606  | 890.4610  | -0.0004 | 0       | (18) | 26                                  | 4 | R.FVSTPNAR.K                      |
|          | NP_188456 |                                               | protease inhibitor/seed storage/lipid transfer protein (LTP) family protein | A. thaliana | 128 |           |           | 446.2376  | 890.4606  | 890.4610  | -0.0004 | 0       | 31   | 1.1                                 | 1 | R.FVSTPNAR.K                      |
|          | NP_188456 |                                               | protease inhibitor/seed storage/lipid transfer protein (LTP) family protein | A. thaliana | 128 |           |           | 446.2379  | 890.4612  | 890.4610  | 0.0002  | 0       | (24) | 6.5                                 | 1 | R.FVSTPNAR.K                      |
|          | NP_188456 |                                               | protease inhibitor/seed storage/lipid transfer protein (LTP) family protein | A. thaliana | 128 |           |           | 485.7783  | 969.5420  | 969.5430  | -0.0009 | 1       | (16) | 30                                  | 3 | K.SCKLPFR.C                       |
|          | NP_188456 |                                               | protease inhibitor/seed storage/lipid transfer protein (LTP) family protein | A. thaliana | 128 |           |           | 485.7789  | 969.5432  | 969.5430  | 0.0003  | 1       | 19   | 13                                  | 3 | K.SCKLPFR.C                       |
|          | NP_188456 |                                               | protease inhibitor/seed storage/lipid transfer protein (LTP) family protein | A. thaliana | 128 |           |           | 524.2879  | 1046.5612 | 1046.5621 | -0.0009 | 1       | 30   | 1.8                                 | 1 | R.RVSTPNAR.K                      |
|          | NP_188456 |                                               | protease inhibitor/seed storage/lipid transfer protein (LTP) family protein | A. thaliana | 128 |           |           | 524.2880  | 1046.5614 | 1046.5621 | -0.0007 | 1       | (20) | 17                                  | 6 | R.RVSTPNAR.K                      |
|          | NP_188456 |                                               | protease inhibitor/seed storage/lipid transfer protein (LTP) family protein | A. thaliana | 128 |           |           | 524.2880  | 1046.5614 | 1046.5621 | -0.0007 | 1       | (26) | 4.4                                 | 1 | R.RVSTPNAR.K                      |
|          | NP_188456 |                                               | protease inhibitor/seed storage/lipid transfer protein (LTP) family protein | A. thaliana | 128 |           |           | 524.2881  | 1046.5616 | 1046.5621 | -0.0005 | 1       | (19) | 21                                  | 7 | R.RVSTPNAR.K                      |
|          | NP_188456 |                                               | protease inhibitor/seed storage/lipid transfer protein (LTP) family protein | A. thaliana | 128 |           |           | 524.2881  | 1046.5616 | 1046.5621 | -0.0005 | 1       | (29) | 2.2                                 | 1 | R.RVSTPNAR.K                      |
|          | NP_188456 |                                               | protease inhibitor/seed storage/lipid transfer protein (LTP) family protein | A. thaliana | 128 |           |           | 495.8841  | 1484.6305 | 1484.6323 | -0.0018 | 0       | (11) | 72                                  | 7 | K.EORPCLCGYMR.N + Oxidation (M)   |
|          | NP_188456 |                                               | protease inhibitor/seed storage/lipid transfer protein (LTP) family protein | A. thaliana | 128 |           |           | 495.8844  | 1484.6314 | 1484.6323 | -0.0009 | 0       | (17) | 22                                  | 2 | K.EORPCLCGYMR.N + Oxidation (M)   |
|          | NP_188456 |                                               | protease inhibitor/seed storage/lipid transfer protein (LTP) family protein | A. thaliana | 128 |           |           | 743.3230  | 1484.6314 | 1484.6323 | -0.0008 | 0       | (22) | 5.9                                 | 2 | K.EORPCLCGYMR.N + Oxidation (M)   |
|          | NP_188456 |                                               | protease inhibitor/seed storage/lipid transfer protein (LTP) family protein | A. thaliana | 128 |           |           | 495.8845  | 1484.6317 | 1484.6323 | -0.0006 | 0       | (22) | 6.3                                 | 1 | K.EORPCLCGYMR.N + Oxidation (M)   |
|          | NP_188456 |                                               | protease inhibitor/seed storage/lipid transfer protein (LTP) family protein | A. thaliana | 128 |           |           | 743.3232  | 1484.6318 | 1484.6323 | -0.0004 | 0       | (21) | 8.4                                 | 1 | K.EORPCLCGYMR.N + Oxidation (M)   |
|          | NP_188456 |                                               | protease inhibitor/seed storage/lipid transfer protein (LTP) family protein | A. thaliana | 128 |           |           | 743.3232  | 1484.6318 | 1484.6323 | -0.0004 | 0       | 23   | 5.1                                 | 1 | K.EORPCLCGYMR.N + Oxidation (M)   |
|          | NP_188456 |                                               | protease inhibitor/seed storage/lipid transfer protein (LTP) family protein | A. thaliana | 128 |           |           | 495.8846  | 1484.6320 | 1484.6323 | -0.0003 | 0       | (20) | 9.1                                 | 1 | K.EORPCLCGYMR.N + Oxidation (M)   |
|          | NP_188456 |                                               | protease inhibitor/seed storage/lipid transfer protein (LTP) family protein | A. thaliana | 128 |           |           | 863.9124  | 1725.8102 | 1725.8113 | -0.0010 | 1       | (24) | 4.1                                 | 1 | K.LKEORPCLCGYMR.N + Oxidation (M) |
|          | NP_188456 |                                               | protease inhibitor/seed storage/lipid transfer protein (LTP) family protein | A. thaliana | 128 |           |           | 576.2774  | 1725.8104 | 1725.8113 | -0.0009 | 1       | (23) | 5                                   | 1 | K.LKEORPCLCGYMR.N + Oxidation (M) |
|          | NP_188456 |                                               | protease inhibitor/seed storage/lipid transfer protein (LTP) family protein | A. thaliana | 128 |           |           | 576.2775  | 1725.8107 | 1725.8113 | -0.0006 | 1       | 25   | 3                                   | 1 | K.LKEORPCLCGYMR.N + Oxidation (M) |
|          | NP_188456 |                                               | protease inhibitor/seed storage/lipid transfer protein (LTP) family protein | A. thaliana | 128 |           |           | 576.2776  | 1725.8110 | 1725.8113 | -0.0003 | 1       | (9)  | 1.2e+02                             | 5 | K.LKEORPCLCGYMR.N + Oxidation (M) |
